# Supplementary material for: GLI1 facilitates collagen-induced arthritis in mice by collaborative regulation of DNA methyltransferases
Source: eLife. 2023 Nov 6;12:e92142. doi: 10.7554/eLife.92142 (PMC10627516; doi:10.7554/eLife.92142)
Supplement: Figure 4—source data 2. [file elife-92142-fig4-data2.xlsx]

## Sheet: Figure4SourceData1
gene_id	Exonic.gene.sizes	G1	G1_FPKM	G2	G2_FPKM	G3	G3_FPKM	C1	C1_FPKM	C2	C2_FPKM	C3	C3_FPKM	Chr	Start	End	Strand	GeneSymbol	Description	GO_BP	GO_CC	GO_MF	KO	Pathway
ENSMUSG00000000001	3262	3023	65.27	2596	66.04	3934	67.79	2962	66.03	3848	69.96	3476	70.39	3	108014596	108053462	-	Gnai3	guanine nucleotide binding protein (G protein)%2C alpha inhibiting 3 [Source:MGI Symbol%3BAcc:MGI:95773]	GO:0007193:adenylate cyclase-inhibiting G-protein coupled receptor signaling pathway;GO:0008016:regulation of heart contraction;GO:0051048:negative regulation of secretion;GO:0006906:vesicle fusion;GO:0051301:cell division;GO:0007049:cell cycle;	GO:0045121:membrane raft;GO:0000139:Golgi membrane;GO:0005834:heterotrimeric G-protein complex;GO:0005813:centrosome;GO:0042588:zymogen granule;GO:0030496:midbody;	GO:0031821:G-protein coupled serotonin receptor binding;GO:0004871:signal transducer activity;GO:0032794:GTPase activating protein binding;GO:0005525:GTP binding;GO:0046872:metal ion binding;GO:0031683:G-protein beta/gamma-subunit complex binding;GO:0019904:protein domain specific binding;GO:0003924:GTPase activity;	K04630	;ko04015 Rap1 signaling pathway;ko04022 cGMP-PKG signaling pathway;ko04024 cAMP signaling pathway;ko04062 Chemokine signaling pathway;ko04071 Sphingolipid signaling pathway;ko04113 Meiosis - yeast;ko04261 Adrenergic signaling in cardiomyocytes;ko04360 Axon guidance;ko04371 Apelin signaling pathway;ko04540 Gap junction;ko04611 Platelet activation;ko04670 Leukocyte transendothelial migration;ko0471…
ENSMUSG00000000003	902	0	0	0	0	0	0	0	0	0	0	0	0	X	76881507	76897229	-	Pbsn	probasin [Source:MGI Symbol%3BAcc:MGI:1860484]	GO:0006810:transport;	GO:0005576:extracellular region;	GO:0005549:odorant binding;GO:0005215:transporter activity;	-	-
ENSMUSG00000000028	3506	1039	20.87	818	19.36	1313	21.05	948	19.66	1108	18.74	1020	19.22	16	18599197	18630737	-	Cdc45	cell division cycle 45 [Source:MGI Symbol%3BAcc:MGI:1338073]	GO:0006270:DNA replication initiation;GO:0007049:cell cycle;GO:0051301:cell division;	GO:0005634:nucleus;GO:0005813:centrosome;	-	K06628	;ko04110 Cell cycle;ko04111 Cell cycle - yeast;ko04113 Meiosis - yeast;
ENSMUSG00000000031	2460	4	0.11	9	0.3	15	0.34	1	0.03	1	0.02	1	0.03	7	142129266	142131880	-	H19	H19%2C imprinted maternally expressed transcript [Source:MGI Symbol%3BAcc:MGI:95891]	-	-	-	-	-
ENSMUSG00000000037	6397	0	0	0	0	0	0	0	0	0	0	0	0	X	159865521	160041209	+	Scml2	Scm polycomb group protein like 2 [Source:MGI Symbol%3BAcc:MGI:1340042]	-	GO:0031519:PcG protein complex;	-	K11465	-
ENSMUSG00000000049	1594	0	0	0	0	0	0	0	0	0	0	0	0	11	108234180	108305222	+	Apoh	apolipoprotein H [Source:MGI Symbol%3BAcc:MGI:88058]	GO:0016525:negative regulation of angiogenesis;GO:0031639:plasminogen activation;GO:0033033:negative regulation of myeloid cell apoptotic process;GO:0031100:organ regeneration;GO:0051006:positive regulation of lipoprotein lipase activity;GO:0034197:triglyceride transport;GO:0051918:negative regulation of fibrinolysis;GO:0010596:negative regulation of endothelial cell migration;GO:0007597:blood co…	GO:0042627:chylomicron;GO:0034361:very-low-density lipoprotein particle;GO:0034364:high-density lipoprotein particle;GO:0009986:cell surface;GO:0031012:extracellular matrix;	GO:0005543:phospholipid binding;GO:0060230:lipoprotein lipase activator activity;GO:0001948:glycoprotein binding;GO:0008201:heparin binding;	K17305	;ko04979 Cholesterol metabolism;
ENSMUSG00000000056	4806	135	1.98	136	2.35	190	2.22	113	1.71	148	1.83	156	2.14	11	121128079	121146682	+	Narf	nuclear prelamin A recognition factor [Source:MGI Symbol%3BAcc:MGI:1914858]	GO:0016567:protein ubiquitination;GO:0043523:regulation of neuron apoptotic process;	GO:0005638:lamin filament;GO:0005737:cytoplasm;	GO:0005521:lamin binding;GO:0008270:zinc ion binding;GO:0004842:ubiquitin-protein transferase activity;GO:0017022:myosin binding;	-	-
ENSMUSG00000000058	3335	7	0.15	11	0.27	10	0.17	14	0.31	14	0.25	11	0.22	6	17281184	17289114	+	Cav2	caveolin 2 [Source:MGI Symbol%3BAcc:MGI:107571]	GO:0048146:positive regulation of fibroblast proliferation;GO:2000811:negative regulation of anoikis;GO:0061180:mammary gland epithelium development;GO:0009267:cellular response to starvation;GO:0060716:labyrinthine layer blood vessel development;GO:0051899:membrane depolarization;GO:0060056:mammary gland involution;GO:0045019:negative regulation of nitric oxide biosynthetic process;GO:0051450:my…	GO:0031234:extrinsic component of cytoplasmic side of plasma membrane;GO:0043234:protein complex;GO:0009925:basal plasma membrane;GO:0016324:apical plasma membrane;GO:0005938:cell cortex;GO:0002080:acrosomal membrane;GO:0005811:lipid particle;GO:0009986:cell surface;GO:0005578:proteinaceous extracellular matrix;GO:0005768:endosome;GO:0005634:nucleus;GO:0005829:cytosol;GO:0030133:transport vesicle…	GO:0005008:hepatocyte growth factor-activated receptor activity;GO:0042803:protein homodimerization activity;GO:0051219:phosphoprotein binding;GO:0005109:frizzled binding;GO:0005198:structural molecule activity;GO:0050998:nitric-oxide synthase binding;GO:0005113:patched binding;GO:0016504:peptidase activator activity;GO:0005524:ATP binding;GO:0031748:D1 dopamine receptor binding;GO:0005125:cytoki…	K12958	;ko04144 Endocytosis;ko04510 Focal adhesion;ko05020 Prion disease;ko05100 Bacterial invasion of epithelial cells;ko05205 Proteoglycans in cancer;ko05418 Fluid shear stress and atherosclerosis;
ENSMUSG00000000078	4391	254	4.07	205	3.87	286	3.66	459	7.6	625	8.44	535	8.05	13	5911481	5920393	+	Klf6	Kruppel-like factor 6 [Source:MGI Symbol%3BAcc:MGI:1346318]	GO:0045944:positive regulation of transcription from RNA polymerase II promoter;GO:0019221:cytokine-mediated signaling pathway;	GO:0005737:cytoplasm;GO:0005634:nucleus;	GO:0003690:double-stranded DNA binding;GO:0008270:zinc ion binding;GO:0003700:sequence-specific DNA binding transcription factor activity;GO:0046872:metal ion binding;	K09207	-
ENSMUSG00000000085	7731	486	4.43	465	4.99	717	5.21	514	4.83	674	5.17	580	4.96	4	120262478	120387383	+	Scmh1	sex comb on midleg homolog 1 [Source:MGI Symbol%3BAcc:MGI:1352762]	GO:0009952:anterior/posterior pattern specification;GO:0007283:spermatogenesis;GO:0045892:negative regulation of transcription, DNA-templated;GO:0006338:chromatin remodeling;	GO:0010369:chromocenter;GO:0005634:nucleus;	GO:0005515:protein binding;	K11461	-
ENSMUSG00000000088	2101	1318	44.18	1100	43.45	1872	50.08	1314	45.48	1543	43.55	1558	48.98	9	57428557	57439709	+	Cox5a	cytochrome c oxidase subunit 5A [Source:MGI Symbol%3BAcc:MGI:88474]	GO:0055114:oxidation-reduction process;	GO:0005743:mitochondrial inner membrane;	GO:0046872:metal ion binding;GO:0004129:cytochrome-c oxidase activity;	K02264	;ko00190 Oxidative phosphorylation;ko01100 Metabolic pathways;ko04260 Cardiac muscle contraction;ko04714 Thermogenesis;ko04932 Non-alcoholic fatty liver disease;ko05010 Alzheimer disease;ko05012 Parkinson disease;ko05014 Amyotrophic lateral sclerosis;ko05016 Huntington disease;ko05020 Prion disease;ko05022 Pathways of neurodegeneration - multiple diseases;
ENSMUSG00000000093	3626	2	0.04	0	0	0	0	1	0.02	0	0	0	0	11	85723377	85732774	+	Tbx2	T-box 2 [Source:MGI Symbol%3BAcc:MGI:98494]	-	-	-	K10176	;ko04013 MAPK signaling pathway - fly;
ENSMUSG00000000094	3401	0	0	0	0	0	0	0	0	0	0	0	0	11	85777248	85806923	+	Tbx4	T-box 4 [Source:MGI Symbol%3BAcc:MGI:102556]	GO:0030324:lung development;GO:0048705:skeletal system morphogenesis;GO:0001525:angiogenesis;GO:0006355:regulation of transcription, DNA-templated;GO:0002009:morphogenesis of an epithelium;GO:0030326:embryonic limb morphogenesis;	GO:0005634:nucleus;	GO:0003677:DNA binding;GO:0005515:protein binding;GO:0003700:sequence-specific DNA binding transcription factor activity;	K10178	-
ENSMUSG00000000103	3107	0	0	0	0	0	0	0	0	0	0	0	0	Y	2106015	2170409	-	Zfy2	zinc finger protein 2%2C Y-linked [Source:MGI Symbol%3BAcc:MGI:99213]	GO:0006355:regulation of transcription, DNA-templated;	GO:0005634:nucleus;	GO:0003677:DNA binding;GO:0008270:zinc ion binding;	-	-
ENSMUSG00000000120	3446	0	0	0	0	0	0	0	0	0	0	0	0	11	95459644	95478561	-	Ngfr	nerve growth factor receptor (TNFR superfamily%2C member 16) [Source:MGI Symbol%3BAcc:MGI:97323]	GO:0010468:regulation of gene expression;GO:0043524:negative regulation of neuron apoptotic process;GO:0048146:positive regulation of fibroblast proliferation;GO:0031069:hair follicle morphogenesis;GO:0016048:detection of temperature stimulus;GO:0042488:positive regulation of odontogenesis of dentin-containing tooth;GO:0032224:positive regulation of synaptic transmission, cholinergic;GO:0007411:a…	GO:0045334:clathrin-coated endocytic vesicle;GO:0005791:rough endoplasmic reticulum;GO:0032809:neuronal cell body membrane;GO:0045121:membrane raft;GO:0043204:perikaryon;GO:0016021:integral component of membrane;GO:0005794:Golgi apparatus;GO:0009897:external side of plasma membrane;GO:0005635:nuclear envelope;GO:0032590:dendrite membrane;	GO:0070678:preprotein binding;GO:0031625:ubiquitin protein ligase binding;GO:0005035:death receptor activity;GO:0001540:beta-amyloid binding;GO:0048406:nerve growth factor binding;GO:0017137:Rab GTPase binding;GO:0005168:neurotrophin TRKA receptor binding;	K02583	;ko04010 MAPK signaling pathway;ko04014 Ras signaling pathway;ko04015 Rap1 signaling pathway;ko04060 Cytokine-cytokine receptor interaction;ko04151 PI3K-Akt signaling pathway;ko04215 Apoptosis - multiple species;ko04722 Neurotrophin signaling pathway;ko05202 Transcriptional misregulation in cancer;
ENSMUSG00000000125	3076	0	0	0	0	0	0	0	0	0	0	0	0	11	103664976	103708783	+	Wnt3	wingless-type MMTV integration site family%2C member 3 [Source:MGI Symbol%3BAcc:MGI:98955]	-	-	-	K00312	;ko04150 mTOR signaling pathway;ko04310 Wnt signaling pathway;ko04390 Hippo signaling pathway;ko04550 Signaling pathways regulating pluripotency of stem cells;ko04916 Melanogenesis;ko04934 Cushing syndrome;ko05010 Alzheimer disease;ko05022 Pathways of neurodegeneration - multiple diseases;ko05165 Human papillomavirus infection;ko05200 Pathways in cancer;ko05205 Proteoglycans in cancer;ko05206 Mic…
ENSMUSG00000000126	3329	0	0	0	0	0	0	1	0.02	0	0	0	0	11	59197754	59224378	+	Wnt9a	wingless-type MMTV integration site family%2C member 9A [Source:MGI Symbol%3BAcc:MGI:2446084]	GO:0007492:endoderm development;GO:0060070:canonical Wnt signaling pathway;GO:0000122:negative regulation of transcription from RNA polymerase II promoter;GO:0060548:negative regulation of cell death;GO:0045597:positive regulation of cell differentiation;GO:0035115:embryonic forelimb morphogenesis;GO:0045880:positive regulation of smoothened signaling pathway;GO:0008285:negative regulation of cel…	GO:0005615:extracellular space;GO:0005578:proteinaceous extracellular matrix;GO:0005886:plasma membrane;	GO:0001664:G-protein coupled receptor binding;	K01064	;ko04150 mTOR signaling pathway;ko04310 Wnt signaling pathway;ko04390 Hippo signaling pathway;ko04550 Signaling pathways regulating pluripotency of stem cells;ko04916 Melanogenesis;ko04934 Cushing syndrome;ko05010 Alzheimer disease;ko05022 Pathways of neurodegeneration - multiple diseases;ko05165 Human papillomavirus infection;ko05200 Pathways in cancer;ko05205 Proteoglycans in cancer;ko05217 Bas…
ENSMUSG00000000127	4680	256	3.85	199	3.53	323	3.88	234	3.64	359	4.55	291	4.11	17	64170057	64446491	+	Fer	fer (fms/fps related) protein kinase [Source:MGI Symbol%3BAcc:MGI:105917]	GO:0033007:negative regulation of mast cell activation involved in immune response;GO:0042058:regulation of epidermal growth factor receptor signaling pathway;GO:0030838:positive regulation of actin filament polymerization;GO:0034614:cellular response to reactive oxygen species;GO:0001932:regulation of protein phosphorylation;GO:0035426:extracellular matrix-cell signaling;GO:0031532:actin cytoske…	GO:0005856:cytoskeleton;GO:0030054:cell junction;GO:0042995:cell projection;GO:0031234:extrinsic component of cytoplasmic side of plasma membrane;GO:0005737:cytoplasm;GO:0005634:nucleus;GO:0000790:nuclear chromatin;GO:0030027:lamellipodium;GO:0015629:actin cytoskeleton;GO:0005938:cell cortex;GO:0015630:microtubule cytoskeleton;	GO:0005154:epidermal growth factor receptor binding;GO:0008289:lipid binding;GO:0008157:protein phosphatase 1 binding;GO:0005524:ATP binding;GO:0004715:non-membrane spanning protein tyrosine kinase activity;GO:0017137:Rab GTPase binding;GO:0019901:protein kinase binding;GO:0045296:cadherin binding;GO:0045295:gamma-catenin binding;GO:0003779:actin binding;	K08889	;ko04520 Adherens junction;
ENSMUSG00000000131	16920	2292	9.54	1793	8.79	2507	8.33	2092	8.99	2728	9.56	2359	9.21	7	125700887	125799673	-	Xpo6	exportin 6 [Source:MGI Symbol%3BAcc:MGI:2429950]	GO:0006611:protein export from nucleus;	GO:0005737:cytoplasm;GO:0005643:nuclear pore;GO:0005730:nucleolus;GO:0005886:plasma membrane;	GO:0008565:protein transporter activity;GO:0005515:protein binding;	-	-
ENSMUSG00000000134	9261	1742	13.25	1455	13.04	2151	13.06	1504	11.81	1815	11.62	1581	11.28	X	7628799	7641441	+	Tfe3	transcription factor E3 [Source:MGI Symbol%3BAcc:MGI:98511]	GO:0045944:positive regulation of transcription from RNA polymerase II promoter;GO:0006959:humoral immune response;GO:0045785:positive regulation of cell adhesion;GO:0045670:regulation of osteoclast differentiation;	GO:0005667:transcription factor complex;	GO:0044212:transcription regulatory region DNA binding;GO:0003700:sequence-specific DNA binding transcription factor activity;GO:0046982:protein heterodimerization activity;	K09105	;ko04137 Mitophagy - animal;ko05202 Transcriptional misregulation in cancer;ko05211 Renal cell carcinoma;
ENSMUSG00000000142	5506	0	0	0	0	0	0	0	0	0	0	0	0	11	108811175	108841609	+	Axin2	axin 2 [Source:MGI Symbol%3BAcc:MGI:1270862]	GO:0071407:cellular response to organic cyclic compound;GO:0030282:bone mineralization;GO:0001957:intramembranous ossification;GO:0043570:maintenance of DNA repeat elements;GO:0043547:positive regulation of GTPase activity;GO:0045668:negative regulation of osteoblast differentiation;GO:0035414:negative regulation of catenin import into nucleus;GO:0042476:odontogenesis;GO:0010718:positive regulati…	GO:0014069:postsynaptic density;GO:0005881:cytoplasmic microtubule;GO:0016023:cytoplasmic membrane-bounded vesicle;GO:0005886:plasma membrane;GO:0030877:beta-catenin destruction complex;GO:0005634:nucleus;GO:0005813:centrosome;GO:0005938:cell cortex;	GO:0004871:signal transducer activity;GO:0070411:I-SMAD binding;GO:0031625:ubiquitin protein ligase binding;GO:0008013:beta-catenin binding;GO:0070016:armadillo repeat domain binding;GO:0019901:protein kinase binding;GO:0005096:GTPase activator activity;	K04385	;ko04310 Wnt signaling pathway;ko04390 Hippo signaling pathway;ko04550 Signaling pathways regulating pluripotency of stem cells;ko04934 Cushing syndrome;ko05010 Alzheimer disease;ko05022 Pathways of neurodegeneration - multiple diseases;ko05165 Human papillomavirus infection;ko05200 Pathways in cancer;ko05210 Colorectal cancer;ko05213 Endometrial cancer;ko05217 Basal cell carcinoma;ko05224 Breast…
ENSMUSG00000000148	6179	236	2.69	213	2.86	292	2.66	267	3.14	330	3.17	253	2.7	5	140690766	140705134	+	Brat1	BRCA1-associated ATM activator 1 [Source:MGI Symbol%3BAcc:MGI:1891679]	GO:0010212:response to ionizing radiation;	GO:0005634:nucleus;	-	-	-
ENSMUSG00000000149	3416	724	14.93	642	15.6	925	15.22	708	15.07	909	15.78	778	15.04	5	140744163	140816186	-	Gna12	guanine nucleotide binding protein%2C alpha 12 [Source:MGI Symbol%3BAcc:MGI:95767]	GO:0042733:embryonic digit morphogenesis;GO:0007266:Rho protein signal transduction;GO:0008360:regulation of cell shape;GO:0007212:dopamine receptor signaling pathway;GO:0042493:response to drug;GO:0030154:cell differentiation;GO:0007188:adenylate cyclase-modulating G-protein coupled receptor signaling pathway;GO:0001701:in utero embryonic development;GO:0007264:small GTPase mediated signal trans…	GO:0031526:brush border membrane;GO:0005834:heterotrimeric G-protein complex;	GO:0004871:signal transducer activity;GO:0005525:GTP binding;GO:0046872:metal ion binding;GO:0031683:G-protein beta/gamma-subunit complex binding;GO:0003924:GTPase activity;GO:0031752:D5 dopamine receptor binding;GO:0001664:G-protein coupled receptor binding;	K04346	;ko04010 MAPK signaling pathway;ko04022 cGMP-PKG signaling pathway;ko04071 Sphingolipid signaling pathway;ko04072 Phospholipase D signaling pathway;ko04270 Vascular smooth muscle contraction;ko04361 Axon regeneration;ko04730 Long-term depression;ko04810 Regulation of actin cytoskeleton;ko04928 Parathyroid hormone synthesis, secretion and action;ko05130 Pathogenic Escherichia coli infection;ko0516…
ENSMUSG00000000154	1699	0	0	0	0	0	0	0	0	0	0	0	0	7	143027473	143053071	+	Slc22a18	solute carrier family 22 (organic cation transporter)%2C member 18 [Source:MGI Symbol%3BAcc:MGI:1336884]	GO:0034220:ion transmembrane transport;GO:0006855:drug transmembrane transport;GO:0015711:organic anion transport;	GO:0005887:integral component of plasma membrane;GO:0016324:apical plasma membrane;GO:0005635:nuclear envelope;GO:0044444:cytoplasmic part;	GO:0031625:ubiquitin protein ligase binding;GO:0015238:drug transmembrane transporter activity;GO:0008514:organic anion transmembrane transporter activity;GO:0015293:symporter activity;	K08214	-
ENSMUSG00000000157	4324	0	0	0	0	0	0	0	0	0	0	0	0	16	96223488	96244819	-	Itgb2l	integrin beta 2-like [Source:MGI Symbol%3BAcc:MGI:1277979]	GO:0007160:cell-matrix adhesion;GO:0006954:inflammatory response;GO:0007229:integrin-mediated signaling pathway;GO:0007275:multicellular organismal development;	GO:0008305:integrin complex;	GO:0004872:receptor activity;	K06464	;ko04015 Rap1 signaling pathway;ko04145 Phagosome;ko04390 Hippo signaling pathway;ko04514 Cell adhesion molecules;ko04610 Complement and coagulation cascades;ko04613 Neutrophil extracellular trap formation;ko04650 Natural killer cell mediated cytotoxicity;ko04670 Leukocyte transendothelial migration;ko04810 Regulation of actin cytoskeleton;ko05133 Pertussis;ko05134 Legionellosis;ko05140 Leishmani…
ENSMUSG00000000159	2523	0	0	0	0	0	0	0	0	0	0	0	0	16	96162868	96223321	+	Igsf5	immunoglobulin superfamily%2C member 5 [Source:MGI Symbol%3BAcc:MGI:1919308]	GO:0016337:single organismal cell-cell adhesion;	GO:0016021:integral component of membrane;GO:0009986:cell surface;GO:0005923:bicellular tight junction;GO:0005886:plasma membrane;	GO:0030165:PDZ domain binding;	K06786	;ko04530 Tight junction;ko05120 Epithelial cell signaling in Helicobacter pylori infection;
ENSMUSG00000000167	2813	28	0.7	35	1.03	37	0.74	26	0.67	34	0.72	36	0.85	9	50528621	50536300	+	Pih1d2	PIH1 domain containing 2 [Source:MGI Symbol%3BAcc:MGI:1919864]	-	-	-	-	-
ENSMUSG00000000168	4886	2048	29.52	1717	29.16	2375	27.32	2016	30	2440	29.62	2129	28.78	9	50545933	50571080	-	Dlat	dihydrolipoamide S-acetyltransferase (E2 component of pyruvate dehydrogenase complex) [Source:MGI Symbol%3BAcc:MGI:2385311]	GO:0006099:tricarboxylic acid cycle;GO:0006086:acetyl-CoA biosynthetic process from pyruvate;GO:0006006:glucose metabolic process;	GO:0005967:mitochondrial pyruvate dehydrogenase complex;	GO:0004742:dihydrolipoyllysine-residue acetyltransferase activity;	K00627	;ko00010 Glycolysis / Gluconeogenesis;ko00020 Citrate cycle (TCA cycle);ko00620 Pyruvate metabolism;ko01100 Metabolic pathways;ko01110 Biosynthesis of secondary metabolites;ko01120 Microbial metabolism in diverse environments;ko01200 Carbon metabolism;
ENSMUSG00000000171	1231	2624	150.14	2267	152.83	3728	170.23	2803	165.57	3226	155.41	3181	170.69	9	50507657	50515112	-	Sdhd	succinate dehydrogenase complex%2C subunit D%2C integral membrane protein [Source:MGI Symbol%3BAcc:MGI:1914175]	GO:0006810:transport;GO:0006099:tricarboxylic acid cycle;GO:0022900:electron transport chain;	GO:0005749:mitochondrial respiratory chain complex II, succinate dehydrogenase complex (ubiquinone);GO:0016021:integral component of membrane;	GO:0046872:metal ion binding;GO:0000104:succinate dehydrogenase activity;GO:0020037:heme binding;GO:0048039:ubiquinone binding;	K00237	;ko00020 Citrate cycle (TCA cycle);ko00190 Oxidative phosphorylation;ko01100 Metabolic pathways;ko01110 Biosynthesis of secondary metabolites;ko01120 Microbial metabolism in diverse environments;ko01200 Carbon metabolism;ko04714 Thermogenesis;ko04932 Non-alcoholic fatty liver disease;ko05010 Alzheimer disease;ko05012 Parkinson disease;ko05014 Amyotrophic lateral sclerosis;ko05016 Huntington disea…
ENSMUSG00000000182	1814	0	0	0	0	0	0	0	0	0	0	0	0	6	127049865	127058371	+	Fgf23	fibroblast growth factor 23 [Source:MGI Symbol%3BAcc:MGI:1891427]	GO:0046888:negative regulation of hormone secretion;GO:0010980:positive regulation of vitamin D 24-hydroxylase activity;GO:0030643:cellular phosphate ion homeostasis;GO:0090080:positive regulation of MAPKKK cascade by fibroblast growth factor receptor signaling pathway;GO:0070374:positive regulation of ERK1 and ERK2 cascade;GO:0030502:negative regulation of bone mineralization;GO:0010966:regulati…	GO:0005615:extracellular space;	GO:0008083:growth factor activity;GO:0005105:type 1 fibroblast growth factor receptor binding;	K04358	;ko04010 MAPK signaling pathway;ko04014 Ras signaling pathway;ko04015 Rap1 signaling pathway;ko04020 Calcium signaling pathway;ko04151 PI3K-Akt signaling pathway;ko04810 Regulation of actin cytoskeleton;ko05200 Pathways in cancer;ko05218 Melanoma;ko05224 Breast cancer;ko05226 Gastric cancer;
ENSMUSG00000000183	4657	0	0	0	0	0	0	0	0	0	0	0	0	6	126992549	127005150	+	Fgf6	fibroblast growth factor 6 [Source:MGI Symbol%3BAcc:MGI:95520]	GO:0001525:angiogenesis;GO:0008543:fibroblast growth factor receptor signaling pathway;GO:0051781:positive regulation of cell division;GO:0045445:myoblast differentiation;GO:0001502:cartilage condensation;GO:0008284:positive regulation of cell proliferation;	GO:0042383:sarcolemma;GO:0005576:extracellular region;	GO:0008083:growth factor activity;	K04358	;ko04010 MAPK signaling pathway;ko04014 Ras signaling pathway;ko04015 Rap1 signaling pathway;ko04020 Calcium signaling pathway;ko04151 PI3K-Akt signaling pathway;ko04810 Regulation of actin cytoskeleton;ko05200 Pathways in cancer;ko05218 Melanoma;ko05224 Breast cancer;ko05226 Gastric cancer;
ENSMUSG00000000184	9409	76	0.57	70	0.62	109	0.65	82	0.63	81	0.51	69	0.48	6	127102125	127129156	-	Ccnd2	cyclin D2 [Source:MGI Symbol%3BAcc:MGI:88314]	GO:0001541:ovarian follicle development;GO:0032869:cellular response to insulin stimulus;GO:0045471:response to ethanol;GO:0007283:spermatogenesis;GO:0045737:positive regulation of cyclin-dependent protein serine/threonine kinase activity;GO:0051301:cell division;GO:0033574:response to testosterone;GO:0045664:regulation of neuron differentiation;GO:0000082:G1/S transition of mitotic cell cycle;GO…	GO:0000785:chromatin;GO:0031965:nuclear membrane;GO:0005730:nucleolus;GO:0005829:cytosol;GO:0000307:cyclin-dependent protein kinase holoenzyme complex;	GO:0019901:protein kinase binding;	K10151	;ko04068 FoxO signaling pathway;ko04110 Cell cycle;ko04115 p53 signaling pathway;ko04151 PI3K-Akt signaling pathway;ko04218 Cellular senescence;ko04310 Wnt signaling pathway;ko04340 Hedgehog signaling pathway;ko04390 Hippo signaling pathway;ko04510 Focal adhesion;ko04630 JAK-STAT signaling pathway;ko04917 Prolactin signaling pathway;ko05162 Measles;ko05165 Human papillomavirus infection;ko05166 H…
ENSMUSG00000000194	12766	591	3.26	445	2.89	742	3.27	576	3.28	730	3.39	680	3.52	2	31042328	31108787	+	Gpr107	G protein-coupled receptor 107 [Source:MGI Symbol%3BAcc:MGI:2139054]	-	GO:0016021:integral component of membrane;	-	-	-
ENSMUSG00000000197	14715	0	0	0	0	0	0	0	0	0	0	0	0	14	123514046	123864556	-	Nalcn	sodium leak channel%2C non-selective [Source:MGI Symbol%3BAcc:MGI:2444306]	-	-	-	-	-
ENSMUSG00000000202	3187	0	0	2	0.05	0	0	2	0.05	5	0.09	0	0	11	114682043	114686771	-	Btbd17	BTB (POZ) domain containing 17 [Source:MGI Symbol%3BAcc:MGI:1919264]	-	GO:0005576:extracellular region;	-	-	-
ENSMUSG00000000204	3964	1878	33.37	1590	33.29	2191	31.07	1643	30.14	1926	28.81	1788	29.79	11	83066012	83081042	+	Slfn4	schlafen 4 [Source:MGI Symbol%3BAcc:MGI:1329010]	-	-	-	-	-
ENSMUSG00000000214	2364	0	0	0	0	0	0	0	0	0	0	0	0	7	142446489	142484865	-	Th	tyrosine hydroxylase [Source:MGI Symbol%3BAcc:MGI:98735]	GO:0052314:phytoalexin metabolic process;GO:0009414:response to water deprivation;GO:0007601:visual perception;GO:0043434:response to peptide hormone;GO:0051289:protein homotetramerization;GO:0007507:heart development;GO:0042136:neurotransmitter biosynthetic process;GO:0051602:response to electrical stimulus;GO:0021987:cerebral cortex development;GO:0008016:regulation of heart contraction;GO:0009…	GO:0005829:cytosol;GO:0005790:smooth endoplasmic reticulum;GO:0009898:cytoplasmic side of plasma membrane;GO:0033162:melanosome membrane;GO:0043204:perikaryon;GO:0043195:terminal bouton;GO:0005739:mitochondrion;GO:0030425:dendrite;GO:0005634:nucleus;GO:0008021:synaptic vesicle;	GO:0035240:dopamine binding;GO:0004511:tyrosine 3-monooxygenase activity;GO:0034617:tetrahydrobiopterin binding;GO:0019904:protein domain specific binding;GO:0019825:oxygen binding;GO:0008198:ferrous iron binding;GO:0008199:ferric iron binding;GO:0016597:amino acid binding;	K00501	;ko00350 Tyrosine metabolism;ko00790 Folate biosynthesis;ko00950 Isoquinoline alkaloid biosynthesis;ko01100 Metabolic pathways;ko01110 Biosynthesis of secondary metabolites;ko04728 Dopaminergic synapse;ko04917 Prolactin signaling pathway;ko05012 Parkinson disease;ko05030 Cocaine addiction;ko05031 Amphetamine addiction;ko05034 Alcoholism;
ENSMUSG00000000215	1312	0	0	0	0	0	0	0	0	0	0	0	0	7	142232393	142297118	-	Ins2	insulin II [Source:MGI Symbol%3BAcc:MGI:96573]	GO:0055089:fatty acid homeostasis;GO:0032148:activation of protein kinase B activity;GO:0046631:alpha-beta T cell activation;GO:0008284:positive regulation of cell proliferation;GO:0016042:lipid catabolic process;GO:0042177:negative regulation of protein catabolic process;GO:0046326:positive regulation of glucose import;GO:0032460:negative regulation of protein oligomerization;GO:0045861:negative…	GO:0005732:small nucleolar ribonucleoprotein complex;GO:0005615:extracellular space;GO:0030141:secretory granule;GO:0005634:nucleus;	GO:0005159:insulin-like growth factor receptor binding;GO:0002020:protease binding;GO:0005158:insulin receptor binding;GO:0005179:hormone activity;	K04526	;ko04010 MAPK signaling pathway;ko04014 Ras signaling pathway;ko04015 Rap1 signaling pathway;ko04022 cGMP-PKG signaling pathway;ko04066 HIF-1 signaling pathway;ko04068 FoxO signaling pathway;ko04072 Phospholipase D signaling pathway;ko04114 Oocyte meiosis;ko04140 Autophagy - animal;ko04150 mTOR signaling pathway;ko04151 PI3K-Akt signaling pathway;ko04152 AMPK signaling pathway;ko04211 Longevity r…
ENSMUSG00000000216	2991	0	0	0	0	0	0	0	0	0	0	0	0	7	121333702	121367698	+	Scnn1g	sodium channel%2C nonvoltage-gated 1 gamma [Source:MGI Symbol%3BAcc:MGI:104695]	GO:0001666:response to hypoxia;GO:0035313:wound healing, spreading of epidermal cells;GO:0050909:sensory perception of taste;GO:0035725:sodium ion transmembrane transport;	GO:0034706:sodium channel complex;GO:0009897:external side of plasma membrane;GO:0016324:apical plasma membrane;	GO:0050699:WW domain binding;GO:0015280:ligand-gated sodium channel activity;	K04827	;ko04742 Taste transduction;ko04960 Aldosterone-regulated sodium reabsorption;
ENSMUSG00000000223	8553	26	0.21	15	0.15	18	0.12	12	0.1	24	0.17	21	0.16	X	133305300	133357322	+	Drp2	dystrophin related protein 2 [Source:MGI Symbol%3BAcc:MGI:107432]	GO:0050808:synapse organization;	GO:0005856:cytoskeleton;GO:0005737:cytoplasm;GO:0030425:dendrite;GO:0005886:plasma membrane;	GO:0005509:calcium ion binding;GO:0008270:zinc ion binding;	-	-
ENSMUSG00000000244	6234	1	0.01	0	0	0	0	0	0	1	0.01	1	0.01	7	142558783	142573381	+	Tspan32	tetraspanin 32 [Source:MGI Symbol%3BAcc:MGI:1350360]	GO:0042832:defense response to protozoan;GO:0070527:platelet aggregation;GO:0007229:integrin-mediated signaling pathway;GO:0007010:cytoskeleton organization;GO:0008285:negative regulation of cell proliferation;GO:0030886:negative regulation of myeloid dendritic cell activation;GO:0050688:regulation of defense response to virus;	GO:0070442:integrin alphaIIb-beta3 complex;GO:0005622:intracellular;GO:0009986:cell surface;	-	K17359	-
ENSMUSG00000000247	4393	0	0	0	0	2	0.03	0	0	0	0	1	0.02	2	38229293	38259745	+	Lhx2	LIM homeobox protein 2 [Source:MGI Symbol%3BAcc:MGI:96785]	GO:0007411:axon guidance;GO:0007498:mesoderm development;GO:2000678:negative regulation of transcription regulatory region DNA binding;GO:0001843:neural tube closure;GO:0021978:telencephalon regionalization;GO:0045944:positive regulation of transcription from RNA polymerase II promoter;GO:0009953:dorsal/ventral pattern formation;GO:0006355:regulation of transcription, DNA-templated;	GO:0005634:nucleus;	GO:0005515:protein binding;GO:0008270:zinc ion binding;GO:0001076:RNA polymerase II transcription factor binding transcription factor activity;GO:0043565:sequence-specific DNA binding;GO:0003700:sequence-specific DNA binding transcription factor activity;GO:0000988:protein binding transcription factor activity;	K09373	-
ENSMUSG00000000248	2847	0	0	0	0	0	0	0	0	0	0	0	0	6	128911344	128961670	+	Clec2g	C-type lectin domain family 2%2C member g [Source:MGI Symbol%3BAcc:MGI:1918059]	GO:0045671:negative regulation of osteoclast differentiation;	GO:0005615:extracellular space;GO:0005886:plasma membrane;GO:0016021:integral component of membrane;	GO:0030246:carbohydrate binding;GO:0046703:natural killer cell lectin-like receptor binding;	K10072	-
ENSMUSG00000000253	2323	231	7	187	6.68	303	7.33	287	8.98	328	8.37	253	7.19	13	45660920	45707276	+	Gmpr	guanosine monophosphate reductase [Source:MGI Symbol%3BAcc:MGI:1913605]	GO:0009117:nucleotide metabolic process;GO:0055114:oxidation-reduction process;	-	GO:0046872:metal ion binding;GO:0003920:GMP reductase activity;	K00364	;ko00230 Purine metabolism;ko01100 Metabolic pathways;
ENSMUSG00000000263	2414	0	0	0	0	0	0	0	0	0	0	0	0	11	55405064	55499024	-	Glra1	glycine receptor%2C alpha 1 subunit [Source:MGI Symbol%3BAcc:MGI:95747]	GO:0051291:protein heterooligomerization;GO:0001964:startle response;GO:0002087:regulation of respiratory gaseous exchange by neurological system process;GO:0001508:action potential;GO:0060013:righting reflex;GO:0060012:synaptic transmission, glycinergic;GO:0007218:neuropeptide signaling pathway;GO:0051970:negative regulation of transmission of nerve impulse;GO:0006936:muscle contraction;GO:00068…	GO:0045211:postsynaptic membrane;GO:0009897:external side of plasma membrane;GO:0030054:cell junction;GO:0005783:endoplasmic reticulum;GO:0005887:integral component of plasma membrane;GO:0034707:chloride channel complex;	GO:0030977:taurine binding;GO:0005515:protein binding;GO:0016934:extracellular-glycine-gated chloride channel activity;GO:0016594:glycine binding;GO:0022824:transmitter-gated ion channel activity;	K05193	;ko04080 Neuroactive ligand-receptor interaction;
ENSMUSG00000000266	8114	0	0	0	0	0	0	0	0	2	0.01	0	0	X	139565348	139668464	+	Mid2	midline 2 [Source:MGI Symbol%3BAcc:MGI:1344333]	-	GO:0005622:intracellular;	GO:0008270:zinc ion binding;	K10647	-
ENSMUSG00000000275	5754	4110	50.31	3312	47.77	4670	45.62	4106	51.89	5211	53.71	4272	49.04	11	88890202	88911119	+	Trim25	tripartite motif-containing 25 [Source:MGI Symbol%3BAcc:MGI:102749]	GO:0051607:defense response to virus;GO:0045087:innate immune response;	GO:0005737:cytoplasm;	GO:0004842:ubiquitin-protein transferase activity;GO:0008270:zinc ion binding;	K10652	;ko04064 NF-kappa B signaling pathway;ko04622 RIG-I-like receptor signaling pathway;ko05164 Influenza A;
ENSMUSG00000000276	8387	291	2.44	245	2.42	315	2.11	284	2.46	434	3.07	332	2.61	11	88926005	88957676	-	Dgke	diacylglycerol kinase%2C epsilon [Source:MGI Symbol%3BAcc:MGI:1889276]	GO:0035556:intracellular signal transduction;GO:0007205:protein kinase C-activating G-protein coupled receptor signaling pathway;GO:0016310:phosphorylation;	GO:0016021:integral component of membrane;	GO:0046872:metal ion binding;GO:0005524:ATP binding;GO:0004143:diacylglycerol kinase activity;	K00901	;ko00561 Glycerolipid metabolism;ko00564 Glycerophospholipid metabolism;ko01100 Metabolic pathways;ko01110 Biosynthesis of secondary metabolites;ko04070 Phosphatidylinositol signaling system;ko04072 Phospholipase D signaling pathway;ko04361 Axon regeneration;ko05231 Choline metabolism in cancer;
ENSMUSG00000000278	2097	1664	55.89	1391	55.05	2143	57.44	2221	77.02	2613	73.9	2342	73.77	11	88814846	88846291	-	Scpep1	serine carboxypeptidase 1 [Source:MGI Symbol%3BAcc:MGI:1921867]	GO:0042573:retinoic acid metabolic process;GO:0006508:proteolysis;	GO:0005576:extracellular region;GO:0005829:cytosol;	GO:0004185:serine-type carboxypeptidase activity;	K09646	-
ENSMUSG00000000282	4627	618	9.41	525	9.42	772	9.38	630	9.9	841	10.78	665	9.49	11	74721746	74736551	+	Mnt	max binding protein [Source:MGI Symbol%3BAcc:MGI:109150]	GO:0051726:regulation of cell cycle;GO:0006355:regulation of transcription, DNA-templated;GO:0007569:cell aging;GO:0042981:regulation of apoptotic process;	GO:0005634:nucleus;	GO:0003677:DNA binding;GO:0005515:protein binding;GO:0003700:sequence-specific DNA binding transcription factor activity;GO:0003682:chromatin binding;GO:0046983:protein dimerization activity;	K09115	-
ENSMUSG00000000290	3052	4572	105.51	3976	108.11	5485	101.02	4540	108.17	5871	114.08	5131	111.05	10	77366086	77401542	+	Itgb2	integrin beta 2 [Source:MGI Symbol%3BAcc:MGI:96611]	GO:0043542:endothelial cell migration;GO:0030593:neutrophil chemotaxis;GO:0050730:regulation of peptidyl-tyrosine phosphorylation;GO:0007160:cell-matrix adhesion;GO:0030101:natural killer cell activation;GO:0045766:positive regulation of angiogenesis;GO:0002523:leukocyte migration involved in inflammatory response;GO:0050798:activated T cell proliferation;GO:0045123:cellular extravasation;GO:0007…	GO:0045121:membrane raft;GO:0009986:cell surface;GO:0008305:integrin complex;	GO:0050839:cell adhesion molecule binding;GO:0019901:protein kinase binding;GO:0046982:protein heterodimerization activity;GO:0001948:glycoprotein binding;GO:0046872:metal ion binding;GO:0032403:protein complex binding;GO:0004872:receptor activity;	K06464	;ko04015 Rap1 signaling pathway;ko04145 Phagosome;ko04390 Hippo signaling pathway;ko04514 Cell adhesion molecules;ko04610 Complement and coagulation cascades;ko04613 Neutrophil extracellular trap formation;ko04650 Natural killer cell mediated cytotoxicity;ko04670 Leukocyte transendothelial migration;ko04810 Regulation of actin cytoskeleton;ko05133 Pertussis;ko05134 Legionellosis;ko05140 Leishmani…
ENSMUSG00000000295	3508	246	4.94	204	4.83	338	5.42	231	4.79	318	5.38	290	5.46	10	31189379	31204200	+	Hddc2	HD domain containing 2 [Source:MGI Symbol%3BAcc:MGI:1916942]	-	GO:0005739:mitochondrion;	GO:0046872:metal ion binding;GO:0008081:phosphoric diester hydrolase activity;	K07023	-
ENSMUSG00000000296	1323	0	0	0	0	0	0	1	0.05	0	0	0	0	10	31208372	31321954	-	Tpd52l1	tumor protein D52-like 1 [Source:MGI Symbol%3BAcc:MGI:1298386]	GO:0006919:activation of cysteine-type endopeptidase activity involved in apoptotic process;GO:0006309:apoptotic DNA fragmentation;GO:0043406:positive regulation of MAP kinase activity;GO:0046330:positive regulation of JNK cascade;GO:0000086:G2/M transition of mitotic cell cycle;	GO:0005769:early endosome;GO:0048471:perinuclear region of cytoplasm;	GO:0008656:cysteine-type endopeptidase activator activity involved in apoptotic process;GO:0046982:protein heterodimerization activity;GO:0042803:protein homodimerization activity;	-	-
ENSMUSG00000000301	2104	53	1.77	49	1.93	63	1.68	49	1.69	72	2.03	70	2.2	11	59861440	59937315	-	Pemt	phosphatidylethanolamine N-methyltransferase [Source:MGI Symbol%3BAcc:MGI:104535]	GO:0045471:response to ethanol;GO:0008285:negative regulation of cell proliferation;GO:0033273:response to vitamin;GO:0042493:response to drug;GO:0043200:response to amino acid;GO:0046498:S-adenosylhomocysteine metabolic process;GO:0032259:methylation;GO:0050747:positive regulation of lipoprotein metabolic process;GO:0006656:phosphatidylcholine biosynthetic process;GO:0046500:S-adenosylmethionine…	GO:0031526:brush border membrane;GO:0016021:integral component of membrane;GO:0005789:endoplasmic reticulum membrane;GO:0031966:mitochondrial membrane;GO:0042383:sarcolemma;GO:0005740:mitochondrial envelope;	GO:0080101:phosphatidyl-N-dimethylethanolamine N-methyltransferase activity;GO:0000773:phosphatidyl-N-methylethanolamine N-methyltransferase activity;GO:0004608:phosphatidylethanolamine N-methyltransferase activity;GO:0008429:phosphatidylethanolamine binding;	K00551	;ko00564 Glycerophospholipid metabolism;ko01100 Metabolic pathways;ko01110 Biosynthesis of secondary metabolites;
ENSMUSG00000000303	4574	0	0	0	0	2	0.02	0	0	0	0	0	0	8	107329983	107396878	+	Cdh1	cadherin 1 [Source:MGI Symbol%3BAcc:MGI:88354]	GO:0071681:cellular response to indole-3-methanol;GO:0009636:response to toxic substance;GO:0071230:cellular response to amino acid stimulus;GO:0007416:synapse assembly;GO:0042993:positive regulation of transcription factor import into nucleus;GO:0001829:trophectodermal cell differentiation;GO:0031175:neuron projection development;GO:0007156:homophilic cell adhesion via plasma membrane adhesion m…	GO:0009986:cell surface;GO:0016235:aggresome;GO:0043296:apical junction complex;GO:0005925:focal adhesion;GO:0005802:trans-Golgi network;GO:0043679:axon terminus;GO:0016323:basolateral plasma membrane;GO:0015629:actin cytoskeleton;GO:0016342:catenin complex;GO:0009898:cytoplasmic side of plasma membrane;GO:0033268:node of Ranvier;GO:0048471:perinuclear region of cytoplasm;GO:0016021:integral comp…	GO:0030506:ankyrin binding;GO:0008013:beta-catenin binding;GO:0019904:protein domain specific binding;GO:0019903:protein phosphatase binding;GO:0032794:GTPase activating protein binding;GO:0005509:calcium ion binding;GO:0045295:gamma-catenin binding;	K05689	;ko04015 Rap1 signaling pathway;ko04371 Apelin signaling pathway;ko04390 Hippo signaling pathway;ko04514 Cell adhesion molecules;ko04520 Adherens junction;ko05100 Bacterial invasion of epithelial cells;ko05200 Pathways in cancer;ko05213 Endometrial cancer;ko05216 Thyroid cancer;ko05218 Melanoma;ko05219 Bladder cancer;ko05226 Gastric cancer;
ENSMUSG00000000305	7257	0	0	0	0	0	0	0	0	0	0	0	0	2	179084224	179541166	+	Cdh4	cadherin 4 [Source:MGI Symbol%3BAcc:MGI:99218]	GO:0007156:homophilic cell adhesion via plasma membrane adhesion molecules;GO:0007411:axon guidance;GO:0007157:heterophilic cell-cell adhesion via plasma membrane cell adhesion molecules;GO:0045773:positive regulation of axon extension;	GO:0016021:integral component of membrane;GO:0005886:plasma membrane;GO:0005887:integral component of plasma membrane;	GO:0005509:calcium ion binding;	K06797	;ko04514 Cell adhesion molecules;
ENSMUSG00000000308	2496	0	0	0	0	0	0	1	0.03	0	0	0	0	2	121188195	121194218	+	Ckmt1	creatine kinase%2C mitochondrial 1%2C ubiquitous [Source:MGI Symbol%3BAcc:MGI:99441]	GO:0046314:phosphocreatine biosynthetic process;GO:0016310:phosphorylation;GO:0006600:creatine metabolic process;GO:0034641:cellular nitrogen compound metabolic process;	GO:0005739:mitochondrion;GO:0016020:membrane;GO:0005743:mitochondrial inner membrane;	GO:0004111:creatine kinase activity;GO:0005515:protein binding;GO:0000166:nucleotide binding;GO:0005524:ATP binding;	K00933	;ko00330 Arginine and proline metabolism;ko01100 Metabolic pathways;
ENSMUSG00000000317	3719	42	0.8	32	0.71	57	0.86	50	0.98	59	0.94	55	0.98	11	70114954	70120624	-	Bcl6b	B cell CLL/lymphoma 6%2C member B [Source:MGI Symbol%3BAcc:MGI:1278332]	GO:0000122:negative regulation of transcription from RNA polymerase II promoter;	GO:0005634:nucleus;	GO:0008270:zinc ion binding;GO:0003677:DNA binding;GO:0005515:protein binding;	-	-
ENSMUSG00000000318	2899	51	1.24	39	1.12	46	0.89	61	1.53	63	1.29	64	1.46	11	70047023	70061660	+	Clec10a	C-type lectin domain family 10%2C member A [Source:MGI Symbol%3BAcc:MGI:96975]	-	GO:0016021:integral component of membrane;	GO:0030246:carbohydrate binding;	K06721	-
ENSMUSG00000000320	4085	4	0.07	0	0	0	0	0	0	0	0	0	0	11	70132283	70146179	-	Alox12	arachidonate 12-lipoxygenase [Source:MGI Symbol%3BAcc:MGI:87998]	GO:0030307:positive regulation of cell growth;GO:0045603:positive regulation of endothelial cell differentiation;GO:0010628:positive regulation of gene expression;GO:0043066:negative regulation of apoptotic process;GO:0048661:positive regulation of smooth muscle cell proliferation;GO:0043065:positive regulation of apoptotic process;GO:0019395:fatty acid oxidation;GO:0045785:positive regulation of…	GO:0005829:cytosol;GO:0042383:sarcolemma;	GO:0004052:arachidonate 12-lipoxygenase activity;GO:0005506:iron ion binding;GO:0016165:linoleate 13S-lipoxygenase activity;	K00458	;ko00590 Arachidonic acid metabolism;ko01100 Metabolic pathways;ko01523 Antifolate resistance;ko04726 Serotonergic synapse;ko04750 Inflammatory mediator regulation of TRP channels;
ENSMUSG00000000326	2532	900	25.04	781	25.6	1202	26.68	1051	30.18	1267	29.68	1066	27.81	16	18225636	18245602	-	Comt	catechol-O-methyltransferase [Source:MGI Symbol%3BAcc:MGI:88470]	GO:0032496:response to lipopolysaccharide;GO:0042420:dopamine catabolic process;GO:0048662:negative regulation of smooth muscle cell proliferation;GO:0008210:estrogen metabolic process;GO:0007612:learning;GO:0042135:neurotransmitter catabolic process;GO:0050668:positive regulation of homocysteine metabolic process;GO:0007565:female pregnancy;GO:0014070:response to organic cyclic compound;GO:00424…	GO:0016021:integral component of membrane;GO:0005886:plasma membrane;GO:0005739:mitochondrion;	GO:0016206:catechol O-methyltransferase activity;GO:0000287:magnesium ion binding;	K00545	;ko00140 Steroid hormone biosynthesis;ko00350 Tyrosine metabolism;ko00965 Betalain biosynthesis;ko01100 Metabolic pathways;ko04728 Dopaminergic synapse;
ENSMUSG00000000339	1880	972	36.42	875	38.62	1243	37.16	890	34.42	1060	33.44	983	34.54	3	116282612	116301857	-	Rtca	RNA 3'-terminal phosphate cyclase [Source:MGI Symbol%3BAcc:MGI:1913618]	GO:0006396:RNA processing;	GO:0005634:nucleus;	GO:0005524:ATP binding;GO:0003963:RNA-3'-phosphate cyclase activity;	K01974	-
ENSMUSG00000000340	3348	673	14.16	670	16.61	846	14.2	741	16.09	913	16.17	866	17.09	3	116306719	116343630	+	Dbt	dihydrolipoamide branched chain transacylase E2 [Source:MGI Symbol%3BAcc:MGI:105386]	GO:0046949:fatty-acyl-CoA biosynthetic process;	GO:0042645:mitochondrial nucleoid;GO:0015630:microtubule cytoskeleton;	GO:0048037:cofactor binding;GO:0043754:dihydrolipoyllysine-residue (2-methylpropanoyl)transferase activity;	K09699	;ko00280 Valine, leucine and isoleucine degradation;ko00640 Propanoate metabolism;ko01100 Metabolic pathways;ko01110 Biosynthesis of secondary metabolites;
ENSMUSG00000000346	2900	3489	84.74	3006	86.02	4443	86.12	3538	88.71	4136	84.58	3874	88.24	15	100513230	100518642	+	Dazap2	DAZ associated protein 2 [Source:MGI Symbol%3BAcc:MGI:1344344]	-	-	-	-	-
ENSMUSG00000000355	1571	666	29.86	594	31.38	927	33.17	670	31.01	819	30.92	774	32.54	X	37689455	37702303	+	Mcts1	malignant T cell amplified sequence 1 [Source:MGI Symbol%3BAcc:MGI:1916245]	GO:0007049:cell cycle;GO:0006974:cellular response to DNA damage stimulus;GO:0040008:regulation of growth;GO:0006355:regulation of transcription, DNA-templated;	GO:0005737:cytoplasm;	GO:0003723:RNA binding;	K07575	-
ENSMUSG00000000359	2156	0	0	1	0.04	3	0.08	1	0.03	1	0.03	0	0	2	152468871	152477118	+	Rem1	rad and gem related GTP binding protein 1 [Source:MGI Symbol%3BAcc:MGI:1097696]	GO:0007264:small GTPase mediated signal transduction;	GO:0016020:membrane;	GO:0005516:calmodulin binding;GO:0003924:GTPase activity;GO:0005525:GTP binding;	K07847	-
ENSMUSG00000000365	6241	0	0	0	0	0	0	0	0	0	0	0	0	14	56640038	56762489	+	Rnf17	ring finger protein 17 [Source:MGI Symbol%3BAcc:MGI:1353419]	GO:0007275:multicellular organismal development;GO:0007286:spermatid development;	GO:0005737:cytoplasm;GO:0005634:nucleus;	GO:0016788:hydrolase activity, acting on ester bonds;GO:0003676:nucleic acid binding;GO:0008270:zinc ion binding;GO:0042803:protein homodimerization activity;	K18405	-
ENSMUSG00000000374	8128	1069	9.26	892	9.11	1310	9.06	1198	10.72	1492	10.89	1305	10.61	10	78022559	78080475	-	Trappc10	trafficking protein particle complex 10 [Source:MGI Symbol%3BAcc:MGI:1336209]	GO:0016192:vesicle-mediated transport;	GO:0005794:Golgi apparatus;	-	-	-
ENSMUSG00000000378	3666	536	10.3	458	10.37	694	10.64	581	11.52	688	11.13	589	10.61	11	6496887	6546744	+	Ccm2	cerebral cavernous malformation 2 [Source:MGI Symbol%3BAcc:MGI:2384924]	GO:0035264:multicellular organism growth;GO:0048845:venous blood vessel morphogenesis;GO:0001885:endothelial cell development;GO:0001570:vasculogenesis;GO:0048839:inner ear development;GO:0045216:cell-cell junction organization;GO:0001701:in utero embryonic development;GO:0060837:blood vessel endothelial cell differentiation;GO:0060039:pericardium development;GO:0061154:endothelial tube morphogen…	GO:0005737:cytoplasm;GO:0043234:protein complex;	GO:0005515:protein binding;	-	-
ENSMUSG00000000381	1008	0	0	0	0	0	0	0	0	0	0	0	0	11	6585482	6588637	-	Wap	whey acidic protein [Source:MGI Symbol%3BAcc:MGI:98943]	GO:0010466:negative regulation of peptidase activity;	GO:0005576:extracellular region;	GO:0030414:peptidase inhibitor activity;GO:0045735:nutrient reservoir activity;	K17106	;ko04917 Prolactin signaling pathway;
ENSMUSG00000000384	3696	1692	32.24	1434	32.2	2255	34.29	1687	33.19	1973	31.66	1660	29.67	11	6565598	6576067	-	Tbrg4	transforming growth factor beta regulated gene 4 [Source:MGI Symbol%3BAcc:MGI:1100868]	GO:0045333:cellular respiration;GO:0006468:protein phosphorylation;	GO:0005739:mitochondrion;	GO:0004672:protein kinase activity;	-	-
ENSMUSG00000000385	7302	4	0.04	1	0.01	1	0.01	0	0	0	0	1	0.01	16	97365882	97412395	-	Tmprss2	transmembrane protease%2C serine 2 [Source:MGI Symbol%3BAcc:MGI:1354381]	GO:0006508:proteolysis;	GO:0005576:extracellular region;GO:0016021:integral component of membrane;GO:0005886:plasma membrane;	GO:0005044:scavenger receptor activity;GO:0004252:serine-type endopeptidase activity;	K09633	;ko05164 Influenza A;ko05171 Coronavirus disease - COVID-19;ko05202 Transcriptional misregulation in cancer;ko05215 Prostate cancer;
ENSMUSG00000000386	3785	24	0.45	18	0.39	26	0.39	19	0.37	20	0.31	8	0.14	16	97248235	97264107	-	Mx1	MX dynamin-like GTPase 1 [Source:MGI Symbol%3BAcc:MGI:97243]	GO:0046822:regulation of nucleocytoplasmic transport;GO:0051607:defense response to virus;GO:0051726:regulation of cell cycle;GO:0045087:innate immune response;GO:0034340:response to type I interferon;GO:0045071:negative regulation of viral genome replication;	GO:0005643:nuclear pore;GO:0005829:cytosol;GO:0048471:perinuclear region of cytoplasm;	GO:0005515:protein binding;GO:0005525:GTP binding;GO:0003924:GTPase activity;	K14754	;ko05160 Hepatitis C;ko05162 Measles;ko05164 Influenza A;ko05165 Human papillomavirus infection;ko05171 Coronavirus disease - COVID-19;
ENSMUSG00000000392	5662	0	0	1	0.01	1	0.01	1	0.01	3	0.03	4	0.05	2	62331287	62404419	-	Fap	fibroblast activation protein [Source:MGI Symbol%3BAcc:MGI:109608]	GO:0043542:endothelial cell migration;GO:0010716:negative regulation of extracellular matrix disassembly;GO:0006508:proteolysis;	GO:0005615:extracellular space;GO:0030027:lamellipodium;GO:0016020:membrane;GO:0030054:cell junction;GO:0005886:plasma membrane;GO:0016021:integral component of membrane;	GO:0002020:protease binding;GO:0004252:serine-type endopeptidase activity;	K08674	-
ENSMUSG00000000394	1494	0	0	0	0	0	0	0	0	0	0	0	0	2	62304874	62313994	-	Gcg	glucagon [Source:MGI Symbol%3BAcc:MGI:95674]	GO:0033138:positive regulation of peptidyl-serine phosphorylation;GO:0035774:positive regulation of insulin secretion involved in cellular response to glucose stimulus;GO:0010737:protein kinase A signaling;GO:0032092:positive regulation of protein binding;GO:0070374:positive regulation of ERK1 and ERK2 cascade;GO:0032099:negative regulation of appetite;GO:0006508:proteolysis;GO:0007188:adenylate …	GO:0005615:extracellular space;GO:0005737:cytoplasm;GO:0016020:membrane;	GO:0031769:glucagon receptor binding;GO:0004252:serine-type endopeptidase activity;GO:0005179:hormone activity;	K05259	;ko04024 cAMP signaling pathway;ko04080 Neuroactive ligand-receptor interaction;ko04714 Thermogenesis;ko04911 Insulin secretion;ko04922 Glucagon signaling pathway;
ENSMUSG00000000399	2101	1410	47.27	1217	48.07	2025	54.18	1520	52.61	1750	49.4	1581	49.71	6	126798684	126826099	-	Ndufa9	NADH:ubiquinone oxidoreductase subunit A9 [Source:MGI Symbol%3BAcc:MGI:1913358]	GO:0009749:response to glucose;GO:0022900:electron transport chain;	GO:0005759:mitochondrial matrix;GO:0005747:mitochondrial respiratory chain complex I;	GO:0000166:nucleotide binding;GO:0003954:NADH dehydrogenase activity;	K03953	;ko00190 Oxidative phosphorylation;ko01100 Metabolic pathways;ko04714 Thermogenesis;ko04723 Retrograde endocannabinoid signaling;ko04932 Non-alcoholic fatty liver disease;ko05010 Alzheimer disease;ko05012 Parkinson disease;ko05014 Amyotrophic lateral sclerosis;ko05016 Huntington disease;ko05020 Prion disease;ko05022 Pathways of neurodegeneration - multiple diseases;
ENSMUSG00000000402	2704	0	0	0	0	0	0	0	0	0	0	0	0	X	165306003	165368716	-	Egfl6	EGF-like-domain%2C multiple 6 [Source:MGI Symbol%3BAcc:MGI:1858599]	GO:0030154:cell differentiation;GO:0010811:positive regulation of cell-substrate adhesion;GO:0007275:multicellular organismal development;GO:0030198:extracellular matrix organization;	GO:0016020:membrane;GO:0005604:basement membrane;	GO:0005509:calcium ion binding;	-	-
ENSMUSG00000000409	2929	70	1.68	49	1.39	97	1.86	76	1.89	77	1.56	83	1.87	4	129442137	129467434	-	Lck	lymphocyte protein tyrosine kinase [Source:MGI Symbol%3BAcc:MGI:96756]	GO:0050856:regulation of T cell receptor signaling pathway;GO:0070474:positive regulation of uterine smooth muscle contraction;GO:0042542:response to hydrogen peroxide;GO:0009612:response to mechanical stimulus;GO:0045588:positive regulation of gamma-delta T cell differentiation;GO:0006919:activation of cysteine-type endopeptidase activity involved in apoptotic process;GO:0042523:positive regulat…	GO:0030139:endocytic vesicle;GO:0001772:immunological synapse;GO:0000242:pericentriolar material;GO:0045121:membrane raft;	GO:0043548:phosphatidylinositol 3-kinase binding;GO:0008022:protein C-terminus binding;GO:0042609:CD4 receptor binding;GO:0051117:ATPase binding;GO:0042169:SH2 domain binding;GO:0042610:CD8 receptor binding;GO:0032403:protein complex binding;GO:0005524:ATP binding;GO:0001948:glycoprotein binding;GO:0004722:protein serine/threonine phosphatase activity;GO:0019901:protein kinase binding;GO:0004715:…	K05856	;ko04064 NF-kappa B signaling pathway;ko04380 Osteoclast differentiation;ko04650 Natural killer cell mediated cytotoxicity;ko04658 Th1 and Th2 cell differentiation;ko04659 Th17 cell differentiation;ko04660 T cell receptor signaling pathway;ko05135 Yersinia infection;ko05166 Human T-cell leukemia virus 1 infection;ko05235 PD-L1 expression and PD-1 checkpoint pathway in cancer;ko05340 Primary immun…
ENSMUSG00000000411	1280	0	0	1	0.06	0	0	0	0	0	0	0	0	4	129382807	129384815	-	Tssk3	testis-specific serine kinase 3 [Source:MGI Symbol%3BAcc:MGI:1929914]	GO:0006468:protein phosphorylation;GO:0035556:intracellular signal transduction;GO:0048240:sperm capacitation;GO:0007275:multicellular organismal development;	GO:0005622:intracellular;	GO:0004674:protein serine/threonine kinase activity;GO:0046872:metal ion binding;GO:0005524:ATP binding;	K08811	-
ENSMUSG00000000416	8829	0	0	0	0	0	0	1	0.01	0	0	0	0	6	18366477	18514842	-	Cttnbp2	cortactin binding protein 2 [Source:MGI Symbol%3BAcc:MGI:1353467]	GO:0007420:brain development;GO:0030036:actin cytoskeleton organization;	GO:0008021:synaptic vesicle;GO:0015629:actin cytoskeleton;	GO:0005519:cytoskeletal regulatory protein binding;GO:0017124:SH3 domain binding;	-	-
ENSMUSG00000000420	5519	1889	24.11	1580	23.76	2344	23.87	1838	24.22	2158	23.19	1966	23.53	18	24338401	24419875	+	Galnt1	polypeptide N-acetylgalactosaminyltransferase 1 [Source:MGI Symbol%3BAcc:MGI:894693]	GO:0018242:protein O-linked glycosylation via serine;GO:0018243:protein O-linked glycosylation via threonine;	GO:0032580:Golgi cisterna membrane;GO:0016021:integral component of membrane;GO:0048471:perinuclear region of cytoplasm;GO:0005576:extracellular region;GO:0005794:Golgi apparatus;	GO:0030145:manganese ion binding;GO:0004653:polypeptide N-acetylgalactosaminyltransferase activity;	K00710	;ko00512 Mucin type O-glycan biosynthesis;ko00514 Other types of O-glycan biosynthesis;ko01100 Metabolic pathways;
ENSMUSG00000000435	2083	0	0	0	0	0	0	0	0	0	0	0	0	10	107318769	107321995	-	Myf5	myogenic factor 5 [Source:MGI Symbol%3BAcc:MGI:97252]	GO:0001952:regulation of cell-matrix adhesion;GO:0060415:muscle tissue morphogenesis;GO:0043010:camera-type eye development;GO:0030198:extracellular matrix organization;GO:0001756:somitogenesis;GO:0001502:cartilage condensation;GO:0001503:ossification;GO:0035914:skeletal muscle cell differentiation;GO:0045944:positive regulation of transcription from RNA polymerase II promoter;GO:0048704:embryoni…	GO:0005634:nucleus;	GO:0046983:protein dimerization activity;GO:0003705:RNA polymerase II distal enhancer sequence-specific DNA binding transcription factor activity;GO:0003677:DNA binding;	K18484	;ko04550 Signaling pathways regulating pluripotency of stem cells;
ENSMUSG00000000439	7005	251	2.52	240	2.84	340	2.73	265	2.75	320	2.71	313	2.95	6	115578863	115599585	+	Mkrn2	makorin%2C ring finger protein%2C 2 [Source:MGI Symbol%3BAcc:MGI:1914277]	-	GO:0005622:intracellular;	GO:0003676:nucleic acid binding;GO:0008270:zinc ion binding;GO:0016874:ligase activity;	K15687	-
ENSMUSG00000000440	2953	0	0	0	0	0	0	0	0	0	0	0	0	6	115337912	115467360	+	Pparg	peroxisome proliferator activated receptor gamma [Source:MGI Symbol%3BAcc:MGI:97747]	GO:0048662:negative regulation of smooth muscle cell proliferation;GO:0042953:lipoprotein transport;GO:0045713:low-density lipoprotein particle receptor biosynthetic process;GO:0055098:response to low-density lipoprotein particle;GO:0035357:peroxisome proliferator activated receptor signaling pathway;GO:0046321:positive regulation of fatty acid oxidation;GO:0050872:white fat cell differentiation;…	GO:0005829:cytosol;GO:0005634:nucleus;	GO:0033613:activating transcription factor binding;GO:0004879:ligand-activated sequence-specific DNA binding RNA polymerase II transcription factor activity;GO:0003707:steroid hormone receptor activity;GO:0008144:drug binding;GO:0046965:retinoid X receptor binding;GO:0008270:zinc ion binding;GO:0003682:chromatin binding;GO:0030374:ligand-dependent nuclear receptor transcription coactivator activi…	K08530	;ko03320 PPAR signaling pathway;ko04152 AMPK signaling pathway;ko04211 Longevity regulating pathway;ko04380 Osteoclast differentiation;ko04714 Thermogenesis;ko05016 Huntington disease;ko05200 Pathways in cancer;ko05202 Transcriptional misregulation in cancer;ko05216 Thyroid cancer;
ENSMUSG00000000441	6845	756	7.78	658	7.98	796	6.54	765	8.13	856	7.42	822	7.93	6	115595028	115653596	-	Raf1	v-raf-leukemia viral oncogene 1 [Source:MGI Symbol%3BAcc:MGI:97847]	GO:0007010:cytoskeleton organization;GO:0000186:activation of MAPKK activity;GO:0043066:negative regulation of apoptotic process;GO:0033138:positive regulation of peptidyl-serine phosphorylation;GO:0007507:heart development;GO:0048011:neurotrophin TRK receptor signaling pathway;GO:0008285:negative regulation of cell proliferation;GO:0031333:negative regulation of protein complex assembly;GO:00016…	GO:0031143:pseudopodium;GO:0005829:cytosol;GO:0005886:plasma membrane;GO:0005634:nucleus;GO:0005739:mitochondrion;	GO:0031434:mitogen-activated protein kinase kinase binding;GO:0046982:protein heterodimerization activity;GO:0046872:metal ion binding;GO:0017016:Ras GTPase binding;GO:0042802:identical protein binding;GO:0004709:MAP kinase kinase kinase activity;GO:0005524:ATP binding;	K04366	;ko01521 EGFR tyrosine kinase inhibitor resistance;ko01522 Endocrine resistance;ko04010 MAPK signaling pathway;ko04012 ErbB signaling pathway;ko04014 Ras signaling pathway;ko04015 Rap1 signaling pathway;ko04022 cGMP-PKG signaling pathway;ko04024 cAMP signaling pathway;ko04062 Chemokine signaling pathway;ko04068 FoxO signaling pathway;ko04071 Sphingolipid signaling pathway;ko04072 Phospholipase D …
ENSMUSG00000000486	2763	3	0.08	6	0.18	5	0.1	4	0.11	3	0.06	6	0.14	7	126813619	126832302	-	Septin1	septin 1 [Source:MGI Symbol%3BAcc:MGI:1858916]	GO:0007049:cell cycle;GO:0051301:cell division;	GO:0005815:microtubule organizing center;GO:0031105:septin complex;	GO:0005525:GTP binding;	K13737	;ko05100 Bacterial invasion of epithelial cells;
ENSMUSG00000000489	4161	202	3.42	223	4.45	237	3.2	364	6.36	503	7.17	391	6.21	15	79880075	79899178	-	Pdgfb	platelet derived growth factor%2C B polypeptide [Source:MGI Symbol%3BAcc:MGI:97528]	GO:0048146:positive regulation of fibroblast proliferation;GO:0072264:metanephric glomerular endothelium development;GO:0032868:response to insulin;GO:0014911:positive regulation of smooth muscle cell migration;GO:0051781:positive regulation of cell division;GO:0043406:positive regulation of MAP kinase activity;GO:1900127:positive regulation of hyaluronan biosynthetic process;GO:0001892:embryonic…	GO:0005737:cytoplasm;GO:0009986:cell surface;GO:0005576:extracellular region;GO:0016323:basolateral plasma membrane;	GO:0008083:growth factor activity;GO:0042056:chemoattractant activity;GO:0046982:protein heterodimerization activity;GO:0042803:protein homodimerization activity;GO:0005161:platelet-derived growth factor receptor binding;GO:0048407:platelet-derived growth factor binding;GO:0016176:superoxide-generating NADPH oxidase activator activity;GO:0005518:collagen binding;	K17386	;ko01521 EGFR tyrosine kinase inhibitor resistance;ko04010 MAPK signaling pathway;ko04014 Ras signaling pathway;ko04015 Rap1 signaling pathway;ko04020 Calcium signaling pathway;ko04072 Phospholipase D signaling pathway;ko04151 PI3K-Akt signaling pathway;ko04510 Focal adhesion;ko04540 Gap junction;ko04630 JAK-STAT signaling pathway;ko04810 Regulation of actin cytoskeleton;ko05167 Kaposi sarcoma-as…
ENSMUSG00000000530	4265	127	2.1	142	2.76	163	2.15	135	2.3	167	2.32	144	2.23	15	101026403	101043217	+	Acvrl1	activin A receptor%2C type II-like 1 [Source:MGI Symbol%3BAcc:MGI:1338946]	GO:0060841:venous blood vessel development;GO:0007179:transforming growth factor beta receptor signaling pathway;GO:0060836:lymphatic endothelial cell differentiation;GO:0023014:signal transduction by protein phosphorylation;GO:2000279:negative regulation of DNA biosynthetic process;GO:0001701:in utero embryonic development;GO:0032924:activin receptor signaling pathway;GO:0061298:retina vasculatu…	GO:0009986:cell surface;GO:0005887:integral component of plasma membrane;GO:0030425:dendrite;GO:0043025:neuronal cell body;	GO:0016361:activin receptor activity, type I;GO:0005025:transforming growth factor beta receptor activity, type I;GO:0046872:metal ion binding;GO:0004702:receptor signaling protein serine/threonine kinase activity;GO:0005524:ATP binding;GO:0019901:protein kinase binding;GO:0050431:transforming growth factor beta binding;GO:0046332:SMAD binding;GO:0048185:activin binding;	K13594	;ko04060 Cytokine-cytokine receptor interaction;
ENSMUSG00000000531	2033	12	0.42	11	0.45	19	0.53	14	0.5	16	0.47	7	0.23	15	101122069	101130637	+	Tamalin	trafficking regulator and scaffold protein tamalin [Source:MGI Symbol%3BAcc:MGI:1860303]	GO:0006886:intracellular protein transport;GO:0007165:signal transduction;	GO:0005737:cytoplasm;GO:0005641:nuclear envelope lumen;GO:0005886:plasma membrane;	GO:0030306:ADP-ribosylation factor binding;GO:0030165:PDZ domain binding;	-	-
ENSMUSG00000000532	4418	233	3.71	208	3.91	277	3.52	279	4.59	334	4.48	279	4.17	15	101071948	101111565	+	Acvr1b	activin A receptor%2C type 1B [Source:MGI Symbol%3BAcc:MGI:1338944]	GO:0046545:development of primary female sexual characteristics;GO:0023014:signal transduction by protein phosphorylation;GO:0001701:in utero embryonic development;GO:0007498:mesoderm development;GO:0000082:G1/S transition of mitotic cell cycle;GO:0010862:positive regulation of pathway-restricted SMAD protein phosphorylation;GO:0001942:hair follicle development;GO:0038092:nodal signaling pathway;…	GO:0009986:cell surface;GO:0005887:integral component of plasma membrane;	GO:0005024:transforming growth factor beta-activated receptor activity;GO:0031625:ubiquitin protein ligase binding;GO:0016361:activin receptor activity, type I;GO:0046872:metal ion binding;GO:0004702:receptor signaling protein serine/threonine kinase activity;GO:0005524:ATP binding;GO:0019838:growth factor binding;GO:0034711:inhibin binding;GO:0046332:SMAD binding;GO:0048185:activin binding;	K13567	;ko04060 Cytokine-cytokine receptor interaction;ko04350 TGF-beta signaling pathway;ko04550 Signaling pathways regulating pluripotency of stem cells;
ENSMUSG00000000538	8764	466	3.75	361	3.42	531	3.41	435	3.61	535	3.62	512	3.86	11	60117540	60243731	-	Tom1l2	target of myb1-like 2 (chicken) [Source:MGI Symbol%3BAcc:MGI:2443306]	GO:0006886:intracellular protein transport;	GO:0005622:intracellular;	-	-	-
ENSMUSG00000000544	2742	0	0	0	0	0	0	0	0	2	0.04	0	0	1	165957807	165994079	+	Gpa33	glycoprotein A33 (transmembrane) [Source:MGI Symbol%3BAcc:MGI:1891703]	-	GO:0005886:plasma membrane;GO:0016021:integral component of membrane;	-	K06790	-
ENSMUSG00000000552	2515	805	22.54	657	21.68	967	21.61	727	21.02	1045	24.64	796	20.91	15	103222322	103248520	-	Zfp385a	zinc finger protein 385A [Source:MGI Symbol%3BAcc:MGI:1352495]	GO:0030220:platelet formation;GO:0045600:positive regulation of fat cell differentiation;GO:0007611:learning or memory;GO:2000765:regulation of cytoplasmic translation;GO:0010609:mRNA localization resulting in posttranscriptional regulation of gene expression;GO:0007626:locomotory behavior;GO:0035855:megakaryocyte development;GO:0007599:hemostasis;GO:0070889:platelet alpha granule organization;	GO:0030425:dendrite;GO:0005622:intracellular;GO:0043025:neuronal cell body;	GO:0003730:mRNA 3'-UTR binding;GO:0008270:zinc ion binding;GO:0003676:nucleic acid binding;	-	-
ENSMUSG00000000555	4933	559	7.98	445	7.49	701	7.99	686	10.11	788	9.47	727	9.73	15	103252713	103275190	-	Itga5	integrin alpha 5 (fibronectin receptor alpha) [Source:MGI Symbol%3BAcc:MGI:96604]	GO:0007613:memory;GO:0007157:heterophilic cell-cell adhesion via plasma membrane cell adhesion molecules;GO:0007229:integrin-mediated signaling pathway;GO:0007044:cell-substrate junction assembly;GO:0050731:positive regulation of peptidyl-tyrosine phosphorylation;GO:0033631:cell-cell adhesion mediated by integrin;GO:0007159:leukocyte cell-cell adhesion;GO:0035313:wound healing, spreading of epide…	GO:0005925:focal adhesion;GO:0005911:cell-cell junction;GO:0032587:ruffle membrane;GO:0005615:extracellular space;GO:0005737:cytoplasm;GO:0008305:integrin complex;GO:0009897:external side of plasma membrane;GO:0045202:synapse;	GO:0005178:integrin binding;GO:0050839:cell adhesion molecule binding;GO:0005154:epidermal growth factor receptor binding;GO:0046872:metal ion binding;GO:0004872:receptor activity;	K06484	;ko04145 Phagosome;ko04151 PI3K-Akt signaling pathway;ko04510 Focal adhesion;ko04512 ECM-receptor interaction;ko04640 Hematopoietic cell lineage;ko04810 Regulation of actin cytoskeleton;ko05100 Bacterial invasion of epithelial cells;ko05131 Shigellosis;ko05133 Pertussis;ko05135 Yersinia infection;ko05165 Human papillomavirus infection;ko05168 Herpes simplex virus 1 infection;ko05205 Proteoglycans…
ENSMUSG00000000560	7640	0	0	0	0	0	0	2	0.02	0	0	0	0	5	71114940	71253192	-	Gabra2	gamma-aminobutyric acid (GABA) A receptor%2C subunit alpha 2 [Source:MGI Symbol%3BAcc:MGI:95614]	GO:0007214:gamma-aminobutyric acid signaling pathway;GO:0006836:neurotransmitter transport;GO:0001505:regulation of neurotransmitter levels;GO:0006821:chloride transport;	GO:0030054:cell junction;GO:0030285:integral component of synaptic vesicle membrane;GO:0045211:postsynaptic membrane;GO:0005886:plasma membrane;GO:0030424:axon;GO:0034707:chloride channel complex;GO:0032590:dendrite membrane;	GO:0008503:benzodiazepine receptor activity;GO:0005230:extracellular ligand-gated ion channel activity;GO:0004890:GABA-A receptor activity;GO:0005254:chloride channel activity;	K05175	;ko04080 Neuroactive ligand-receptor interaction;ko04723 Retrograde endocannabinoid signaling;ko04727 GABAergic synapse;ko04742 Taste transduction;ko05032 Morphine addiction;ko05033 Nicotine addiction;
ENSMUSG00000000561	4841	1663	24.2	1420	24.34	2068	24.01	1554	23.34	1899	23.26	1704	23.25	3	105866685	105877353	+	Wdr77	WD repeat domain 77 [Source:MGI Symbol%3BAcc:MGI:1917715]	GO:0006357:regulation of transcription from RNA polymerase II promoter;GO:0060770:negative regulation of epithelial cell proliferation involved in prostate gland development;GO:0060528:secretory columnal luminar epithelial cell differentiation involved in prostate glandular acinus development;GO:0008284:positive regulation of cell proliferation;	GO:0005730:nucleolus;GO:0005794:Golgi apparatus;GO:0005737:cytoplasm;GO:0005634:nucleus;	GO:0030374:ligand-dependent nuclear receptor transcription coactivator activity;	K13221	-
ENSMUSG00000000562	3729	3	0.06	4	0.09	3	0.05	4	0.08	4	0.06	2	0.04	3	105778174	105816242	+	Adora3	adenosine A3 receptor [Source:MGI Symbol%3BAcc:MGI:104847]	GO:0014068:positive regulation of phosphatidylinositol 3-kinase signaling;GO:0001973:adenosine receptor signaling pathway;GO:0050850:positive regulation of calcium-mediated signaling;GO:0070257:positive regulation of mucus secretion;GO:0002687:positive regulation of leukocyte migration;GO:0002553:histamine secretion by mast cell;GO:0050729:positive regulation of inflammatory response;GO:0014061:r…	GO:0042734:presynaptic membrane;GO:0005887:integral component of plasma membrane;	GO:0001609:G-protein coupled adenosine receptor activity;	K04268	;ko04022 cGMP-PKG signaling pathway;ko04071 Sphingolipid signaling pathway;ko04080 Neuroactive ligand-receptor interaction;
ENSMUSG00000000563	4105	5866	100.65	5198	105.08	7960	109	5790	102.56	6834	98.73	6401	103	3	105850014	105867415	-	Atp5pb	ATP synthase peripheral stalk-membrane subunit b [Source:MGI Symbol%3BAcc:MGI:1100495]	GO:0015986:ATP synthesis coupled proton transport;	GO:0000276:mitochondrial proton-transporting ATP synthase complex, coupling factor F(o);	GO:0046933:proton-transporting ATP synthase activity, rotational mechanism;	K02127	;ko00190 Oxidative phosphorylation;ko01100 Metabolic pathways;ko04714 Thermogenesis;ko05010 Alzheimer disease;ko05012 Parkinson disease;ko05014 Amyotrophic lateral sclerosis;ko05016 Huntington disease;ko05020 Prion disease;ko05022 Pathways of neurodegeneration - multiple diseases;
ENSMUSG00000000567	4135	0	0	1	0.02	3	0.04	0	0	0	0	0	0	11	112673050	112678586	+	Sox9	SRY (sex determining region Y)-box 9 [Source:MGI Symbol%3BAcc:MGI:98371]	GO:0007173:epidermal growth factor receptor signaling pathway;GO:0006334:nucleosome assembly;GO:0071504:cellular response to heparin;GO:0019933:cAMP-mediated signaling;GO:0001837:epithelial to mesenchymal transition;GO:0001934:positive regulation of protein phosphorylation;GO:0071364:cellular response to epidermal growth factor stimulus;GO:0006461:protein complex assembly;GO:0035019:somatic stem …	GO:0005667:transcription factor complex;	GO:0001158:enhancer sequence-specific DNA binding;GO:0001077:RNA polymerase II core promoter proximal region sequence-specific DNA binding transcription factor activity involved in positive regulation of transcription;GO:0008013:beta-catenin binding;GO:0001046:core promoter sequence-specific DNA binding;GO:0004672:protein kinase activity;GO:0003705:RNA polymerase II distal enhancer sequence-speci…	K18435	;ko04024 cAMP signaling pathway;
ENSMUSG00000000568	7354	4336	41.53	3621	40.86	5470	41.81	3873	38.3	4787	38.6	4306	38.68	5	100103794	100126797	-	Hnrnpd	heterogeneous nuclear ribonucleoprotein D [Source:MGI Symbol%3BAcc:MGI:101947]	GO:0006401:RNA catabolic process;GO:0000398:mRNA splicing, via spliceosome;GO:0043488:regulation of mRNA stability;GO:0045893:positive regulation of transcription, DNA-templated;GO:0006355:regulation of transcription, DNA-templated;GO:0048255:mRNA stabilization;	GO:0005829:cytosol;GO:0005730:nucleolus;GO:0030529:ribonucleoprotein complex;GO:0005654:nucleoplasm;GO:0005634:nucleus;	GO:0042162:telomeric DNA binding;GO:0003723:RNA binding;GO:0005515:protein binding;GO:0000166:nucleotide binding;	K13044	-
ENSMUSG00000000579	3777	69	1.29	61	1.34	96	1.43	89	1.71	72	1.13	74	1.29	17	6869070	6877173	+	Dynlt1c	dynein light chain Tctex-type 1C [Source:MGI Symbol%3BAcc:MGI:3807476]	GO:0019060:intracellular transport of viral protein in host cell;GO:0048812:neuron projection morphogenesis;GO:0051493:regulation of cytoskeleton organization;GO:0000132:establishment of mitotic spindle orientation;GO:0051301:cell division;GO:0007067:mitotic nuclear division;GO:0008277:regulation of G-protein coupled receptor protein signaling pathway;GO:0050768:negative regulation of neurogenesi…	GO:0005858:axonemal dynein complex;GO:0005794:Golgi apparatus;GO:0005874:microtubule;GO:0005819:spindle;GO:0005868:cytoplasmic dynein complex;	GO:0042802:identical protein binding;GO:0003774:motor activity;	K10420	;ko05132 Salmonella infection;
ENSMUSG00000000581	3995	580	10.23	524	10.88	855	12.03	580	10.56	747	11.09	661	10.93	11	17207579	17219176	+	C1d	C1D nuclear receptor co-repressor [Source:MGI Symbol%3BAcc:MGI:1927354]	GO:0006915:apoptotic process;GO:0000460:maturation of 5.8S rRNA;GO:0045892:negative regulation of transcription, DNA-templated;	GO:0017053:transcriptional repressor complex;GO:0005739:mitochondrion;GO:0005730:nucleolus;	GO:0003723:RNA binding;GO:0003677:DNA binding;GO:0003714:transcription corepressor activity;GO:0016922:ligand-dependent nuclear receptor binding;	K12592	;ko03018 RNA degradation;
ENSMUSG00000000594	4127	682	11.64	577	11.6	957	13.03	592	10.43	691	9.93	616	9.86	11	54988941	55003855	+	Gm2a	GM2 ganglioside activator protein [Source:MGI Symbol%3BAcc:MGI:95762]	GO:0009313:oligosaccharide catabolic process;GO:0007611:learning or memory;GO:0050885:neuromuscular process controlling balance;GO:0006869:lipid transport;GO:0019915:lipid storage;GO:0006689:ganglioside catabolic process;GO:0051345:positive regulation of hydrolase activity;	GO:0005764:lysosome;GO:0009898:cytoplasmic side of plasma membrane;GO:0005739:mitochondrion;GO:0005730:nucleolus;GO:0045179:apical cortex;GO:0005889:hydrogen:potassium-exchanging ATPase complex;	GO:0008289:lipid binding;GO:0016004:phospholipase activator activity;GO:0032428:beta-N-acetylgalactosaminidase activity;GO:0005319:lipid transporter activity;	K12383	;ko04142 Lysosome;
ENSMUSG00000000600	21853	790	2.55	612	2.32	916	2.36	800	2.66	951	2.58	823	2.49	5	3853184	3895564	+	Krit1	KRIT1%2C ankyrin repeat containing [Source:MGI Symbol%3BAcc:MGI:1930618]	GO:0001937:negative regulation of endothelial cell proliferation;GO:0010596:negative regulation of endothelial cell migration;GO:2000114:regulation of establishment of cell polarity;GO:2000352:negative regulation of endothelial cell apoptotic process;GO:0016525:negative regulation of angiogenesis;GO:0045454:cell redox homeostasis;GO:0032092:positive regulation of protein binding;GO:0050790:regula…	GO:0043234:protein complex;GO:0005856:cytoskeleton;GO:0005911:cell-cell junction;GO:0005737:cytoplasm;GO:0005886:plasma membrane;	GO:0005515:protein binding;	K17705	;ko04015 Rap1 signaling pathway;ko04212 Longevity regulating pathway - worm;
ENSMUSG00000000605	8575	885	7.27	692	6.7	1027	6.73	840	7.12	1029	7.12	901	6.94	7	7285308	7303850	-	Clcn4	chloride channel%2C voltage-sensitive 4 [Source:MGI Symbol%3BAcc:MGI:104571]	GO:0055085:transmembrane transport;GO:0006821:chloride transport;	GO:0016021:integral component of membrane;GO:0005768:endosome;GO:0031901:early endosome membrane;GO:0031902:late endosome membrane;	GO:0005247:voltage-gated chloride channel activity;GO:0005524:ATP binding;GO:0015297:antiporter activity;	K05012	;ko04613 Neutrophil extracellular trap formation;
ENSMUSG00000000606	4597	0	0	0	0	0	0	0	0	0	0	0	0	14	51648277	51658178	+	Vmn2r88	vomeronasal 2%2C receptor 88 [Source:MGI Symbol%3BAcc:MGI:1316662]	GO:0007186:G-protein coupled receptor signaling pathway;GO:0007165:signal transduction;	GO:0016021:integral component of membrane;GO:0005886:plasma membrane;GO:0016020:membrane;	GO:0004930:G-protein coupled receptor activity;GO:0004871:signal transducer activity;	K04613	-
ENSMUSG00000000617	5421	0	0	0	0	0	0	0	0	0	0	0	0	11	50741512	50757035	+	Grm6	glutamate receptor%2C metabotropic 6 [Source:MGI Symbol%3BAcc:MGI:1351343]	GO:0007196:adenylate cyclase-inhibiting G-protein coupled glutamate receptor signaling pathway;GO:0050953:sensory perception of light stimulus;GO:0007268:synaptic transmission;GO:0060041:retina development in camera-type eye;GO:0007626:locomotory behavior;	GO:0005886:plasma membrane;GO:0035841:new growing cell tip;GO:0016021:integral component of membrane;	GO:0001640:adenylate cyclase inhibiting G-protein coupled glutamate receptor activity;	K04608	;ko04072 Phospholipase D signaling pathway;ko04080 Neuroactive ligand-receptor interaction;ko04724 Glutamatergic synapse;
ENSMUSG00000000627	5290	0	0	0	0	0	0	0	0	1	0.01	0	0	6	82888866	82916750	-	Sema4f	sema domain%2C immunoglobulin domain (Ig)%2C TM domain%2C and short cytoplasmic domain [Source:MGI Symbol%3BAcc:MGI:1340055]	GO:0030517:negative regulation of axon extension;GO:0031290:retinal ganglion cell axon guidance;	GO:0016021:integral component of membrane;GO:0045211:postsynaptic membrane;GO:0005783:endoplasmic reticulum;GO:0005886:plasma membrane;	GO:0004872:receptor activity;GO:0005515:protein binding;	K06521	;ko04360 Axon guidance;
ENSMUSG00000000628	5969	2607	30.76	2185	30.38	3137	29.54	2623	31.95	3154	31.34	2851	31.55	6	82702006	82751435	-	Hk2	hexokinase 2 [Source:MGI Symbol%3BAcc:MGI:1315197]	GO:0007595:lactation;GO:0046324:regulation of glucose import;GO:0001678:cellular glucose homeostasis;GO:0046835:carbohydrate phosphorylation;GO:0008637:apoptotic mitochondrial changes;GO:0006096:glycolytic process;GO:0051156:glucose 6-phosphate metabolic process;	GO:0005829:cytosol;GO:0005741:mitochondrial outer membrane;	GO:0005536:glucose binding;GO:0005524:ATP binding;GO:0004340:glucokinase activity;GO:0019158:mannokinase activity;GO:0008865:fructokinase activity;	K00844	;ko00010 Glycolysis / Gluconeogenesis;ko00051 Fructose and mannose metabolism;ko00052 Galactose metabolism;ko00500 Starch and sucrose metabolism;ko00520 Amino sugar and nucleotide sugar metabolism;ko00521 Streptomycin biosynthesis;ko00524 Neomycin, kanamycin and gentamicin biosynthesis;ko01100 Metabolic pathways;ko01110 Biosynthesis of secondary metabolites;ko01120 Microbial metabolism in diverse…
ENSMUSG00000000631	16037	1061	4.66	853	4.41	1216	4.26	1008	4.57	1225	4.53	1034	4.26	11	77654072	77756806	+	Myo18a	myosin XVIIIA [Source:MGI Symbol%3BAcc:MGI:2667185]	GO:0016477:cell migration;GO:0031032:actomyosin structure organization;	GO:0005737:cytoplasm;GO:0016459:myosin complex;GO:0042641:actomyosin;	GO:0005524:ATP binding;GO:0003774:motor activity;	K10362	-
ENSMUSG00000000632	5779	0	0	0	0	0	0	2	0.03	0	0	0	0	11	77821626	77869874	+	Sez6	seizure related gene 6 [Source:MGI Symbol%3BAcc:MGI:104745]	GO:0060079:regulation of excitatory postsynaptic membrane potential;GO:2000171:negative regulation of dendrite development;GO:1900006:positive regulation of dendrite development;	GO:0030054:cell junction;GO:0016021:integral component of membrane;GO:0045202:synapse;GO:0043197:dendritic spine;GO:0005615:extracellular space;GO:0043198:dendritic shaft;GO:0005737:cytoplasm;GO:0005886:plasma membrane;	-	-	-
ENSMUSG00000000673	4681	0	0	0	0	0	0	0	0	0	0	0	0	17	84138585	84155392	-	Haao	3-hydroxyanthranilate 3%2C4-dioxygenase [Source:MGI Symbol%3BAcc:MGI:1349444]	GO:0055114:oxidation-reduction process;GO:0009435:NAD biosynthetic process;GO:0046874:quinolinate metabolic process;GO:0070050:neuron cellular homeostasis;GO:0010043:response to zinc ion;GO:0046686:response to cadmium ion;GO:0019363:pyridine nucleotide biosynthetic process;	GO:0005829:cytosol;GO:0031966:mitochondrial membrane;	GO:0000334:3-hydroxyanthranilate 3,4-dioxygenase activity;GO:0008198:ferrous iron binding;GO:0019825:oxygen binding;	K00452	;ko00380 Tryptophan metabolism;ko01100 Metabolic pathways;ko01240 Biosynthesis of cofactors;
ENSMUSG00000000682	1187	1439	85.39	1250	87.39	1914	90.64	1063	65.12	1252	62.55	1313	73.07	4	133809759	133822393	-	Cd52	CD52 antigen [Source:MGI Symbol%3BAcc:MGI:1346088]	-	GO:0016020:membrane;	-	K06488	-
ENSMUSG00000000686	3035	7	0.16	11	0.3	11	0.2	5	0.12	8	0.16	6	0.13	11	77405947	77429433	+	Abhd15	abhydrolase domain containing 15 [Source:MGI Symbol%3BAcc:MGI:1914727]	-	GO:0005576:extracellular region;	-	K13707;K04429	;ko04010 MAPK signaling pathway;
ENSMUSG00000000690	1964	152	5.45	114	4.82	164	4.69	137	5.07	154	4.65	116	3.9	11	96183302	96192395	+	Hoxb6	homeobox B6 [Source:MGI Symbol%3BAcc:MGI:96187]	GO:0048704:embryonic skeletal system morphogenesis;GO:0009952:anterior/posterior pattern specification;GO:0006355:regulation of transcription, DNA-templated;GO:0034101:erythrocyte homeostasis;	GO:0005634:nucleus;	GO:0043565:sequence-specific DNA binding;GO:0003700:sequence-specific DNA binding transcription factor activity;	K09306	-
ENSMUSG00000000693	4603	123	1.88	94	1.69	126	1.54	113	1.79	161	2.07	157	2.25	6	83011154	83029543	+	Loxl3	lysyl oxidase-like 3 [Source:MGI Symbol%3BAcc:MGI:1337004]	GO:0055114:oxidation-reduction process;GO:0001837:epithelial to mesenchymal transition;GO:0045892:negative regulation of transcription, DNA-templated;	GO:0005576:extracellular region;GO:0016020:membrane;	GO:0005507:copper ion binding;GO:0005044:scavenger receptor activity;GO:0016641:oxidoreductase activity, acting on the CH-NH2 group of donors, oxygen as acceptor;	K00280	-
ENSMUSG00000000701	1055	0	0	0	0	0	0	0	0	0	0	0	0	12	105142603	105147404	+	Tcl1b5	T cell leukemia/lymphoma 1B%2C 5 [Source:MGI Symbol%3BAcc:MGI:1351635]	-	-	-	K16836	;ko04151 PI3K-Akt signaling pathway;
ENSMUSG00000000706	4119	0	0	0	0	0	0	0	0	0	0	0	0	13	23641162	23650071	-	Btn1a1	butyrophilin%2C subfamily 1%2C member A1 [Source:MGI Symbol%3BAcc:MGI:103118]	GO:0050710:negative regulation of cytokine secretion;GO:0031324:negative regulation of cellular metabolic process;GO:0046007:negative regulation of activated T cell proliferation;	GO:0016021:integral component of membrane;	GO:0005515:protein binding;	K06712	-
ENSMUSG00000000708	4867	371	5.37	292	4.98	473	5.46	328	4.9	470	5.73	426	5.78	17	53873889	53979748	+	Kat2b	K(lysine) acetyltransferase 2B [Source:MGI Symbol%3BAcc:MGI:1343094]	GO:0032869:cellular response to insulin stimulus;GO:0008285:negative regulation of cell proliferation;GO:0018076:N-terminal peptidyl-lysine acetylation;GO:0010835:regulation of protein ADP-ribosylation;GO:0045736:negative regulation of cyclin-dependent protein serine/threonine kinase activity;GO:0043966:histone H3 acetylation;GO:0045944:positive regulation of transcription from RNA polymerase II …	GO:0031672:A band;GO:0005671:Ada2/Gcn5/Ada3 transcription activator complex;GO:0031674:I band;GO:0000776:kinetochore;GO:0042641:actomyosin;	GO:0042826:histone deacetylase binding;GO:0004402:histone acetyltransferase activity;GO:0019901:protein kinase binding;GO:0004468:lysine N-acetyltransferase activity, acting on acetyl phosphate as donor;GO:0003713:transcription coactivator activity;GO:0008134:transcription factor binding;GO:0004861:cyclin-dependent protein serine/threonine kinase inhibitor activity;	K06062	;ko04330 Notch signaling pathway;ko04919 Thyroid hormone signaling pathway;ko05166 Human T-cell leukemia virus 1 infection;ko05203 Viral carcinogenesis;
ENSMUSG00000000711	4201	827	13.87	669	13.22	992	13.27	750	12.98	976	13.78	831	13.07	10	128513044	128532133	-	Rab5b	RAB5B%2C member RAS oncogene family [Source:MGI Symbol%3BAcc:MGI:105938]	GO:0030100:regulation of endocytosis;GO:0007032:endosome organization;GO:0015031:protein transport;GO:0007264:small GTPase mediated signal transduction;	GO:0042470:melanosome;GO:0030139:endocytic vesicle;GO:0005886:plasma membrane;GO:0031901:early endosome membrane;	GO:0030742:GTP-dependent protein binding;GO:0005525:GTP binding;GO:0019003:GDP binding;GO:0003924:GTPase activity;	K07888	;ko04014 Ras signaling pathway;ko04144 Endocytosis;ko04145 Phagosome;ko04962 Vasopressin-regulated water reabsorption;ko05132 Salmonella infection;ko05146 Amoebiasis;ko05152 Tuberculosis;
ENSMUSG00000000724	1594	0	0	0	0	0	0	1	0.05	0	0	1	0.04	11	77609441	77616109	-	Cryba1	crystallin%2C beta A1 [Source:MGI Symbol%3BAcc:MGI:88518]	GO:0043010:camera-type eye development;GO:0007601:visual perception;	GO:0005737:cytoplasm;GO:0005634:nucleus;	GO:0005212:structural constituent of eye lens;GO:0042803:protein homodimerization activity;	-	-
ENSMUSG00000000730	2988	8	0.19	5	0.14	16	0.3	12	0.29	9	0.18	13	0.29	10	77877781	77899456	+	Dnmt3l	DNA (cytosine-5-)-methyltransferase 3-like [Source:MGI Symbol%3BAcc:MGI:1859287]	GO:0001890:placenta development;GO:0032259:methylation;GO:0045892:negative regulation of transcription, DNA-templated;GO:0001701:in utero embryonic development;GO:0043085:positive regulation of catalytic activity;GO:0060718:chorionic trophoblast cell differentiation;GO:0071514:genetic imprinting;	GO:0005829:cytosol;GO:0000794:condensed nuclear chromosome;GO:0005720:nuclear heterochromatin;	GO:0008047:enzyme activator activity;GO:0046872:metal ion binding;GO:0019899:enzyme binding;GO:0008168:methyltransferase activity;	K17400	-
ENSMUSG00000000731	3825	0	0	0	0	0	0	0	0	0	0	0	0	10	77865856	77879444	-	Aire	autoimmune regulator (autoimmune polyendocrinopathy candidiasis ectodermal dystrophy) [Source:MGI Symbol%3BAcc:MGI:1338803]	GO:0045944:positive regulation of transcription from RNA polymerase II promoter;GO:0006959:humoral immune response;	GO:0005730:nucleolus;GO:0015629:actin cytoskeleton;GO:0005737:cytoplasm;GO:0005886:plasma membrane;GO:0005634:nucleus;	GO:0042393:histone binding;GO:0008270:zinc ion binding;GO:0044212:transcription regulatory region DNA binding;GO:0042802:identical protein binding;GO:0045182:translation regulator activity;GO:0003682:chromatin binding;	K10603	;ko04120 Ubiquitin mediated proteolysis;ko05340 Primary immunodeficiency;
ENSMUSG00000000732	4620	6	0.09	6	0.11	14	0.17	7	0.11	10	0.13	12	0.17	10	77905136	77919747	+	Icosl	icos ligand [Source:MGI Symbol%3BAcc:MGI:1354701]	GO:0042104:positive regulation of activated T cell proliferation;GO:0007165:signal transduction;GO:0045190:isotype switching;GO:0045404:positive regulation of interleukin-4 biosynthetic process;	GO:0009897:external side of plasma membrane;GO:0005887:integral component of plasma membrane;	GO:0005102:receptor binding;	K06710	;ko04514 Cell adhesion molecules;ko04672 Intestinal immune network for IgA production;
ENSMUSG00000000738	4518	625	9.74	482	8.85	737	9.17	567	9.13	660	8.66	637	9.31	8	123789681	123824499	+	Spg7	SPG7%2C paraplegin matrix AAA peptidase subunit [Source:MGI Symbol%3BAcc:MGI:2385906]	GO:0030155:regulation of cell adhesion;GO:0006508:proteolysis;GO:0007005:mitochondrion organization;GO:0008089:anterograde axon cargo transport;GO:0030163:protein catabolic process;	GO:0005739:mitochondrion;GO:0016021:integral component of membrane;GO:0031966:mitochondrial membrane;	GO:0017111:nucleoside-triphosphatase activity;GO:0008270:zinc ion binding;GO:0004222:metalloendopeptidase activity;GO:0005524:ATP binding;	K09552	-
ENSMUSG00000000739	4419	0	0	0	0	0	0	0	0	0	0	0	0	8	123866931	123885054	-	Sult5a1	sulfotransferase family 5A%2C member 1 [Source:MGI Symbol%3BAcc:MGI:1931463]	-	-	GO:0008146:sulfotransferase activity;GO:0016740:transferase activity;	K01015	;ko00140 Steroid hormone biosynthesis;
ENSMUSG00000000740	2595	576	15.63	506	16.18	824	17.85	553	15.5	666	15.22	611	15.55	8	123829089	123831983	+	Rpl13	ribosomal protein L13 [Source:MGI Symbol%3BAcc:MGI:105922]	-	-	-	K02873	;ko03010 Ribosome;ko05171 Coronavirus disease - COVID-19;
ENSMUSG00000000743	3272	676	14.55	546	13.85	883	15.17	692	15.38	826	14.97	750	15.14	8	123931003	123939502	-	Chmp1a	charged multivesicular body protein 1A [Source:MGI Symbol%3BAcc:MGI:1920159]	GO:0016458:gene silencing;GO:0007076:mitotic chromosome condensation;GO:0015031:protein transport;GO:0045014:negative regulation of transcription by glucose;GO:0016192:vesicle-mediated transport;GO:0000910:cytokinesis;	GO:0016020:membrane;GO:0005815:microtubule organizing center;GO:0005769:early endosome;GO:0016363:nuclear matrix;GO:0000794:condensed nuclear chromosome;GO:0012505:endomembrane system;	GO:0019904:protein domain specific binding;	K12197	;ko04144 Endocytosis;ko04217 Necroptosis;
ENSMUSG00000000751	5578	3093	39.06	2836	42.19	4419	44.53	3322	43.31	4096	43.55	3694	43.74	11	75188992	75239150	-	Rpa1	replication protein A1 [Source:MGI Symbol%3BAcc:MGI:1915525]	GO:0048873:homeostasis of number of cells within a tissue;GO:0007126:meiotic nuclear division;GO:0051276:chromosome organization;GO:0030097:hemopoiesis;GO:0006260:DNA replication;GO:0000724:double-strand break repair via homologous recombination;GO:0008284:positive regulation of cell proliferation;GO:0001701:in utero embryonic development;	GO:0001673:male germ cell nucleus;GO:0016605:PML body;GO:0000800:lateral element;GO:0005662:DNA replication factor A complex;	GO:0046872:metal ion binding;GO:0003697:single-stranded DNA binding;GO:0003682:chromatin binding;	K07466	;ko03030 DNA replication;ko03420 Nucleotide excision repair;ko03430 Mismatch repair;ko03440 Homologous recombination;ko03460 Fanconi anemia pathway;
ENSMUSG00000000753	2359	42	1.25	37	1.3	63	1.5	30	0.92	30	0.75	38	1.06	11	75300595	75313527	-	Serpinf1	serine (or cysteine) peptidase inhibitor%2C clade F%2C member 1 [Source:MGI Symbol%3BAcc:MGI:108080]	GO:0016525:negative regulation of angiogenesis;GO:0010951:negative regulation of endopeptidase activity;GO:0050769:positive regulation of neurogenesis;GO:0060770:negative regulation of epithelial cell proliferation involved in prostate gland development;GO:0030162:regulation of proteolysis;GO:0050728:negative regulation of inflammatory response;GO:0007614:short-term memory;	GO:0005615:extracellular space;	GO:0004867:serine-type endopeptidase inhibitor activity;	K19614	;ko04310 Wnt signaling pathway;
ENSMUSG00000000759	8568	991	8.15	838	8.12	1161	7.62	957	8.12	1202	8.32	1023	7.89	8	12664277	12722248	-	Tubgcp3	tubulin%2C gamma complex associated protein 3 [Source:MGI Symbol%3BAcc:MGI:2183752]	GO:0007020:microtubule nucleation;	GO:0005827:polar microtubule;GO:0005814:centriole;	GO:0043015:gamma-tubulin binding;	K16570	-
ENSMUSG00000000766	8037	0	0	0	0	0	0	0	0	0	0	0	0	10	6708506	6988198	+	Oprm1	opioid receptor%2C mu 1 [Source:MGI Symbol%3BAcc:MGI:97441]	GO:0050769:positive regulation of neurogenesis;GO:0043951:negative regulation of cAMP-mediated signaling;GO:0007626:locomotory behavior;GO:0048149:behavioral response to ethanol;GO:0031635:adenylate cyclase-inhibiting opioid receptor signaling pathway;GO:0050795:regulation of behavior;GO:0007204:positive regulation of cytosolic calcium ion concentration;GO:0045019:negative regulation of nitric ox…	GO:0005925:focal adhesion;GO:0045121:membrane raft;GO:0032590:dendrite membrane;GO:0016021:integral component of membrane;GO:0042383:sarcolemma;GO:0032839:dendrite cytoplasm;GO:0043204:perikaryon;GO:0005887:integral component of plasma membrane;	GO:0031005:filamin binding;GO:0001965:G-protein alpha-subunit binding;GO:0038047:morphine receptor activity;GO:0031681:G-protein beta-subunit binding;GO:0004979:beta-endorphin receptor activity;GO:0005245:voltage-gated calcium channel activity;	K04215	;ko04080 Neuroactive ligand-receptor interaction;ko04915 Estrogen signaling pathway;ko05032 Morphine addiction;
ENSMUSG00000000776	2854	685	16.91	661	19.22	958	18.87	716	18.24	883	18.35	776	17.96	14	70676197	70680887	-	Polr3d	polymerase (RNA) III (DNA directed) polypeptide D [Source:MGI Symbol%3BAcc:MGI:1914315]	GO:0032728:positive regulation of interferon-beta production;GO:0006383:transcription from RNA polymerase III promoter;GO:0045089:positive regulation of innate immune response;GO:0051607:defense response to virus;	GO:0005666:DNA-directed RNA polymerase III complex;	GO:0003899:DNA-directed RNA polymerase activity;GO:0003677:DNA binding;GO:0003682:chromatin binding;	K03026	;ko03020 RNA polymerase;ko04623 Cytosolic DNA-sensing pathway;
ENSMUSG00000000782	3019	1	0.02	2	0.05	5	0.09	8	0.19	4	0.08	11	0.24	11	52143198	52174158	-	Tcf7	transcription factor 7%2C T cell specific [Source:MGI Symbol%3BAcc:MGI:98507]	GO:0060070:canonical Wnt signaling pathway;GO:0048699:generation of neurons;GO:0042127:regulation of cell proliferation;GO:0071353:cellular response to interleukin-4;GO:0048619:embryonic hindgut morphogenesis;GO:0042981:regulation of apoptotic process;GO:0006357:regulation of transcription from RNA polymerase II promoter;GO:0007420:brain development;GO:0030538:embryonic genitalia morphogenesis;GO…	GO:0005667:transcription factor complex;	GO:0044212:transcription regulatory region DNA binding;GO:0043565:sequence-specific DNA binding;GO:0003700:sequence-specific DNA binding transcription factor activity;GO:0003682:chromatin binding;GO:0008013:beta-catenin binding;	K02620	;ko04310 Wnt signaling pathway;ko04390 Hippo signaling pathway;ko04520 Adherens junction;ko04550 Signaling pathways regulating pluripotency of stem cells;ko04916 Melanogenesis;ko04934 Cushing syndrome;ko05132 Salmonella infection;ko05165 Human papillomavirus infection;ko05167 Kaposi sarcoma-associated herpesvirus infection;ko05200 Pathways in cancer;ko05210 Colorectal cancer;ko05213 Endometrial c…
ENSMUSG00000000787	5277	13456	179.6	11468	180.35	16352	174.18	12995	179.07	15979	179.58	14508	181.61	X	13147209	13160291	+	Ddx3x	DEAD box helicase 3%2C X-linked [Source:MGI Symbol%3BAcc:MGI:103064]	GO:0043065:positive regulation of apoptotic process;GO:0045948:positive regulation of translational initiation;GO:0032728:positive regulation of interferon-beta production;GO:0007059:chromosome segregation;GO:0071243:cellular response to arsenic-containing substance;GO:1900087:positive regulation of G1/S transition of mitotic cell cycle;GO:0043280:positive regulation of cysteine-type endopeptidas…	GO:0010494:cytoplasmic stress granule;GO:0005741:mitochondrial outer membrane;GO:0022627:cytosolic small ribosomal subunit;GO:0005852:eukaryotic translation initiation factor 3 complex;GO:0016607:nuclear speck;	GO:0043024:ribosomal small subunit binding;GO:0008190:eukaryotic initiation factor 4E binding;GO:0004003:ATP-dependent DNA helicase activity;GO:0004004:ATP-dependent RNA helicase activity;GO:0008134:transcription factor binding;GO:0035613:RNA stem-loop binding;GO:0008143:poly(A) binding;GO:0048027:mRNA 5'-UTR binding;GO:0003677:DNA binding;GO:0005524:ATP binding;	K11594	;ko04622 RIG-I-like receptor signaling pathway;ko05161 Hepatitis B;ko05203 Viral carcinogenesis;
ENSMUSG00000000791	4105	72	1.24	48	0.97	87	1.19	58	1.03	71	1.03	73	1.17	8	71261093	71274068	+	Il12rb1	interleukin 12 receptor%2C beta 1 [Source:MGI Symbol%3BAcc:MGI:104579]	GO:0002230:positive regulation of defense response to virus by host;GO:0042104:positive regulation of activated T cell proliferation;GO:0035722:interleukin-12-mediated signaling pathway;GO:0018108:peptidyl-tyrosine phosphorylation;GO:0071346:cellular response to interferon-gamma;GO:0002827:positive regulation of T-helper 1 type immune response;GO:0032729:positive regulation of interferon-gamma pr…	GO:0072536:interleukin-23 receptor complex;GO:0042022:interleukin-12 receptor complex;GO:0009897:external side of plasma membrane;	GO:0019955:cytokine binding;	K05063	;ko04060 Cytokine-cytokine receptor interaction;ko04630 JAK-STAT signaling pathway;ko04658 Th1 and Th2 cell differentiation;ko04659 Th17 cell differentiation;ko05200 Pathways in cancer;ko05321 Inflammatory bowel disease;
ENSMUSG00000000792	2928	1	0.02	0	0	0	0	1	0.02	3	0.06	1	0.02	8	71335533	71345401	-	Slc5a5	solute carrier family 5 (sodium iodide symporter)%2C member 5 [Source:MGI Symbol%3BAcc:MGI:2149330]	GO:0071371:cellular response to gonadotropin stimulus;GO:0071320:cellular response to cAMP;GO:0035725:sodium ion transmembrane transport;GO:0015705:iodide transport;GO:0006590:thyroid hormone generation;	GO:0016021:integral component of membrane;GO:0005634:nucleus;GO:0005886:plasma membrane;	GO:0008507:sodium:iodide symporter activity;GO:0015111:iodide transmembrane transporter activity;	K14385	;ko04918 Thyroid hormone synthesis;
ENSMUSG00000000794	10451	0	0	0	0	0	0	0	0	1	0.01	0	0	3	89427471	89582439	+	Kcnn3	potassium intermediate/small conductance calcium-activated channel%2C subfamily N%2C member 3 [Source:MGI Symbol%3BAcc:MGI:2153183]	GO:0006813:potassium ion transport;	GO:0005737:cytoplasm;GO:0031594:neuromuscular junction;GO:0043005:neuron projection;GO:0005886:plasma membrane;GO:0030175:filopodium;GO:0016021:integral component of membrane;GO:0043025:neuronal cell body;	GO:0016286:small conductance calcium-activated potassium channel activity;GO:0046982:protein heterodimerization activity;GO:0005516:calmodulin binding;	K04944	;ko04911 Insulin secretion;ko04929 GnRH secretion;
ENSMUSG00000000804	7680	899	8.24	695	7.51	995	7.28	840	7.95	1124	8.68	1002	8.62	11	84875268	85030987	-	Usp32	ubiquitin specific peptidase 32 [Source:MGI Symbol%3BAcc:MGI:2144475]	GO:0006508:proteolysis;GO:0006511:ubiquitin-dependent protein catabolic process;	GO:0005794:Golgi apparatus;	GO:0008234:cysteine-type peptidase activity;	K11837	-
ENSMUSG00000000805	1966	0	0	0	0	0	0	1	0.04	0	0	0	0	11	84848612	84856870	+	Car4	carbonic anhydrase 4 [Source:MGI Symbol%3BAcc:MGI:1096574]	GO:0048545:response to steroid hormone;GO:0015701:bicarbonate transport;GO:0006730:one-carbon metabolic process;GO:0048513:organ development;GO:0042493:response to drug;	GO:0016529:sarcoplasmic reticulum;GO:0005793:endoplasmic reticulum-Golgi intermediate compartment;GO:0031526:brush border membrane;GO:0030658:transport vesicle membrane;GO:0031362:anchored component of external side of plasma membrane;GO:0005791:rough endoplasmic reticulum;GO:0030667:secretory granule membrane;GO:0005802:trans-Golgi network;GO:0048471:perinuclear region of cytoplasm;GO:0016324:ap…	GO:0004089:carbonate dehydratase activity;GO:0008270:zinc ion binding;	K18246	;ko00910 Nitrogen metabolism;ko01100 Metabolic pathways;ko04964 Proximal tubule bicarbonate reclamation;
ENSMUSG00000000811	2836	104	2.58	76	2.22	111	2.2	101	2.59	120	2.51	112	2.61	6	89620970	89652511	+	Txnrd3	thioredoxin reductase 3 [Source:MGI Symbol%3BAcc:MGI:2386711]	GO:0006810:transport;GO:0022900:electron transport chain;GO:0045454:cell redox homeostasis;GO:0007283:spermatogenesis;GO:0006749:glutathione metabolic process;GO:0030154:cell differentiation;GO:0007275:multicellular organismal development;	GO:0005783:endoplasmic reticulum;GO:0005634:nucleus;	GO:0009055:electron carrier activity;GO:0050660:flavin adenine dinucleotide binding;GO:0050661:NADP binding;GO:0004791:thioredoxin-disulfide reductase activity;GO:0015035:protein disulfide oxidoreductase activity;	K00384	;ko00450 Selenocompound metabolism;
ENSMUSG00000000817	1937	0	0	0	0	0	0	0	0	0	0	0	0	1	161608258	161616064	-	Fasl	Fas ligand (TNF superfamily%2C member 6) [Source:MGI Symbol%3BAcc:MGI:99255]	GO:0070848:response to growth factor;GO:0016525:negative regulation of angiogenesis;GO:0032496:response to lipopolysaccharide;GO:0000122:negative regulation of transcription from RNA polymerase II promoter;GO:0006925:inflammatory cell apoptotic process;GO:0006955:immune response;GO:0006919:activation of cysteine-type endopeptidase activity involved in apoptotic process;GO:0048388:endosomal lumen …	GO:0005615:extracellular space;GO:0060205:cytoplasmic membrane-bounded vesicle lumen;GO:0016021:integral component of membrane;GO:0009897:external side of plasma membrane;GO:0070062:extracellular exosome;GO:0048471:perinuclear region of cytoplasm;GO:0043202:lysosomal lumen;GO:0005901:caveola;GO:0005634:nucleus;GO:0016023:cytoplasmic membrane-bounded vesicle;GO:0005764:lysosome;	GO:0005164:tumor necrosis factor receptor binding;GO:0005125:cytokine activity;GO:0005123:death receptor binding;	K04389	;ko01524 Platinum drug resistance;ko04010 MAPK signaling pathway;ko04014 Ras signaling pathway;ko04060 Cytokine-cytokine receptor interaction;ko04068 FoxO signaling pathway;ko04151 PI3K-Akt signaling pathway;ko04210 Apoptosis;ko04217 Necroptosis;ko04650 Natural killer cell mediated cytotoxicity;ko04722 Neurotrophin signaling pathway;ko04932 Non-alcoholic fatty liver disease;ko04940 Type I diabete…
ENSMUSG00000000823	6810	590	6.1	415	5.06	601	4.96	536	5.72	593	5.16	537	5.21	2	181223896	181234596	-	Zfp512b	zinc finger protein 512B [Source:MGI Symbol%3BAcc:MGI:2685478]	-	GO:0005730:nucleolus;	GO:0008270:zinc ion binding;	-	-
ENSMUSG00000000826	6953	1877	19.01	1607	19.18	2297	18.57	1914	20.02	2210	18.85	2088	19.84	2	181162278	181196926	+	Dnajc5	DnaJ heat shock protein family (Hsp40) member C5 [Source:MGI Symbol%3BAcc:MGI:892995]	GO:0043524:negative regulation of neuron apoptotic process;	GO:0005886:plasma membrane;GO:0008021:synaptic vesicle;	GO:0001948:glycoprotein binding;GO:0043008:ATP-dependent protein binding;	K09525	;ko04141 Protein processing in endoplasmic reticulum;
ENSMUSG00000000827	4982	734	10.38	668	11.13	955	10.77	722	10.54	815	9.7	796	10.55	2	181138935	181159759	+	Tpd52l2	tumor protein D52-like 2 [Source:MGI Symbol%3BAcc:MGI:1913564]	-	GO:0048471:perinuclear region of cytoplasm;	GO:0042803:protein homodimerization activity;	-	-
ENSMUSG00000000838	8966	1747	13.72	1468	13.59	2000	12.54	1667	13.52	2084	13.78	1890	13.92	X	67722147	67761569	+	Fmr1	FMRP translational regulator 1 [Source:MGI Symbol%3BAcc:MGI:95564]	GO:0007417:central nervous system development;GO:0045947:negative regulation of translational initiation;GO:0051028:mRNA transport;	GO:0010494:cytoplasmic stress granule;GO:0005845:mRNA cap binding complex;GO:0045202:synapse;GO:0043197:dendritic spine;GO:0071598:neuronal ribonucleoprotein granule;GO:0043198:dendritic shaft;GO:0005844:polysome;GO:0005634:nucleus;GO:0005730:nucleolus;GO:0042788:polysomal ribosome;GO:0005654:nucleoplasm;	GO:0003723:RNA binding;GO:0005515:protein binding;GO:0003729:mRNA binding;	K15516	;ko03013 RNA transport;
ENSMUSG00000000861	13175	0	0	0	0	0	0	0	0	0	0	0	0	11	24028056	24124123	+	Bcl11a	B cell CLL/lymphoma 11A (zinc finger protein) [Source:MGI Symbol%3BAcc:MGI:106190]	GO:0030217:T cell differentiation;GO:0048671:negative regulation of collateral sprouting;GO:0048672:positive regulation of collateral sprouting;GO:0010629:negative regulation of gene expression;GO:0006355:regulation of transcription, DNA-templated;GO:0030183:B cell differentiation;GO:2000171:negative regulation of dendrite development;GO:0010976:positive regulation of neuron projection developmen…	GO:0005737:cytoplasm;GO:0016604:nuclear body;	GO:0003714:transcription corepressor activity;GO:0008270:zinc ion binding;GO:0046982:protein heterodimerization activity;GO:0003676:nucleic acid binding;	-	-
ENSMUSG00000000869	1227	13	0.75	5	0.34	12	0.55	21	1.24	13	0.63	21	1.13	11	53493809	53509496	-	Il4	interleukin 4 [Source:MGI Symbol%3BAcc:MGI:96556]	GO:0045892:negative regulation of transcription, DNA-templated;GO:0042104:positive regulation of activated T cell proliferation;GO:0048295:positive regulation of isotype switching to IgE isotypes;GO:0045671:negative regulation of osteoclast differentiation;GO:0031296:B cell costimulation;GO:0010155:regulation of proton transport;GO:0051091:positive regulation of sequence-specific DNA binding tran…	GO:0005615:extracellular space;GO:0009897:external side of plasma membrane;	GO:0008083:growth factor activity;GO:0005136:interleukin-4 receptor binding;GO:0005125:cytokine activity;	K05430	;ko04060 Cytokine-cytokine receptor interaction;ko04151 PI3K-Akt signaling pathway;ko04630 JAK-STAT signaling pathway;ko04640 Hematopoietic cell lineage;ko04657 IL-17 signaling pathway;ko04658 Th1 and Th2 cell differentiation;ko04659 Th17 cell differentiation;ko04660 T cell receptor signaling pathway;ko04664 Fc epsilon RI signaling pathway;ko04672 Intestinal immune network for IgA production;ko05…
ENSMUSG00000000876	3114	76	1.72	62	1.65	116	2.09	82	1.91	82	1.56	83	1.76	2	154427678	154445628	-	Pxmp4	peroxisomal membrane protein 4 [Source:MGI Symbol%3BAcc:MGI:1891701]	-	GO:0016021:integral component of membrane;GO:0005778:peroxisomal membrane;	-	K13350	;ko04146 Peroxisome;
ENSMUSG00000000881	5844	119	1.43	107	1.52	136	1.31	113	1.41	138	1.4	110	1.24	X	99811328	99862016	+	Dlg3	discs large MAGUK scaffold protein 3 [Source:MGI Symbol%3BAcc:MGI:1888986]	GO:0007411:axon guidance;GO:0045197:establishment or maintenance of epithelial cell apical/basal polarity;GO:0008285:negative regulation of cell proliferation;GO:0007268:synaptic transmission;GO:0007165:signal transduction;GO:0001736:establishment of planar polarity;GO:0010923:negative regulation of phosphatase activity;	GO:0005923:bicellular tight junction;GO:0045202:synapse;GO:0009986:cell surface;GO:0043198:dendritic shaft;GO:0043025:neuronal cell body;GO:0030426:growth cone;GO:0005737:cytoplasm;GO:0005887:integral component of plasma membrane;GO:0014069:postsynaptic density;GO:0032281:alpha-amino-3-hydroxy-5-methyl-4-isoxazolepropionic acid selective glutamate receptor complex;	GO:0035255:ionotropic glutamate receptor binding;GO:0008022:protein C-terminus binding;GO:0031625:ubiquitin protein ligase binding;GO:0004385:guanylate kinase activity;GO:0030165:PDZ domain binding;GO:0019903:protein phosphatase binding;	K12075	;ko04390 Hippo signaling pathway;ko04530 Tight junction;ko05165 Human papillomavirus infection;
ENSMUSG00000000884	4219	112	1.87	128	2.52	203	2.7	145	2.5	151	2.12	149	2.33	16	18317463	18385429	+	Gnb1l	guanine nucleotide binding protein (G protein)%2C beta polypeptide 1-like [Source:MGI Symbol%3BAcc:MGI:1338057]	GO:0035176:social behavior;	GO:0005737:cytoplasm;	-	-	-
ENSMUSG00000000889	2692	0	0	0	0	0	0	0	0	0	0	0	0	2	27055245	27073212	+	Dbh	dopamine beta hydroxylase [Source:MGI Symbol%3BAcc:MGI:94864]	GO:0042127:regulation of cell proliferation;GO:0007626:locomotory behavior;GO:0042420:dopamine catabolic process;GO:0001975:response to amphetamine;GO:0048149:behavioral response to ethanol;GO:0042981:regulation of apoptotic process;GO:0007613:memory;GO:0008542:visual learning;GO:0060348:bone development;GO:0042309:homoiothermy;GO:0046333:octopamine metabolic process;GO:0050909:sensory perception…	GO:0030658:transport vesicle membrane;GO:0043196:varicosity;GO:0042584:chromaffin granule membrane;GO:0016021:integral component of membrane;GO:0030425:dendrite;GO:0043025:neuronal cell body;GO:0045177:apical part of cell;GO:0043195:terminal bouton;GO:0034466:chromaffin granule lumen;	GO:0004500:dopamine beta-monooxygenase activity;GO:0031418:L-ascorbic acid binding;GO:0005507:copper ion binding;	K00503	;ko00350 Tyrosine metabolism;ko01100 Metabolic pathways;
ENSMUSG00000000901	2778	0	0	1	0.03	0	0	0	0	2	0.04	0	0	10	75759056	75772330	-	Mmp11	matrix metallopeptidase 11 [Source:MGI Symbol%3BAcc:MGI:97008]	GO:0030574:collagen catabolic process;GO:0006508:proteolysis;	GO:0005578:proteinaceous extracellular matrix;	GO:0004222:metalloendopeptidase activity;GO:0005509:calcium ion binding;GO:0008270:zinc ion binding;	K07993	-
ENSMUSG00000000902	7930	1153	10.24	925	9.68	1513	10.72	1143	10.48	1423	10.64	1259	10.49	10	75732603	75757451	-	Smarcb1	SWI/SNF related%2C matrix associated%2C actin dependent regulator of chromatin%2C subfamily b%2C member 1 [Source:MGI Symbol%3BAcc:MGI:1328366]	GO:0043044:ATP-dependent chromatin remodeling;GO:0043923:positive regulation by host of viral transcription;GO:0044772:mitotic cell cycle phase transition;GO:0006337:nucleosome disassembly;GO:0051091:positive regulation of sequence-specific DNA binding transcription factor activity;GO:0008285:negative regulation of cell proliferation;GO:0030154:cell differentiation;GO:0045944:positive regulation …	GO:0071565:nBAF complex;GO:0016514:SWI/SNF complex;GO:0001741:XY body;GO:0071564:npBAF complex;GO:0005730:nucleolus;GO:0000228:nuclear chromosome;GO:0005654:nucleoplasm;	GO:0002039:p53 binding;GO:0030957:Tat protein binding;GO:0003713:transcription coactivator activity;	K11648	;ko04714 Thermogenesis;ko05225 Hepatocellular carcinoma;
ENSMUSG00000000903	859	0	0	0	0	1	0.07	0	0	0	0	1	0.08	10	75778891	75785491	+	Vpreb3	pre-B lymphocyte gene 3 [Source:MGI Symbol%3BAcc:MGI:98938]	-	-	-	K06553	-
ENSMUSG00000000915	7369	27	0.26	27	0.3	37	0.28	24	0.24	31	0.25	25	0.22	5	124111691	124143621	+	Hip1r	huntingtin interacting protein 1 related [Source:MGI Symbol%3BAcc:MGI:1352504]	GO:0006898:receptor-mediated endocytosis;	GO:0005856:cytoskeleton;GO:0005905:coated pit;GO:0030136:clathrin-coated vesicle;	GO:0035091:phosphatidylinositol binding;GO:0003779:actin binding;	-	-
ENSMUSG00000000916	4317	411	6.71	273	5.25	494	6.43	350	5.9	392	5.39	361	5.52	5	135398807	135405659	+	Nsun5	NOL1/NOP2/Sun domain family%2C member 5 [Source:MGI Symbol%3BAcc:MGI:2140844]	GO:0032259:methylation;	-	GO:0008168:methyltransferase activity;	K15264	-
ENSMUSG00000000934	2043	417	14.38	276	11.21	493	13.56	338	12.03	430	12.48	345	11.15	15	75528884	75550649	-	Top1mt	DNA topoisomerase 1%2C mitochondrial [Source:MGI Symbol%3BAcc:MGI:1920210]	GO:0006265:DNA topological change;GO:0007059:chromosome segregation;GO:0006338:chromatin remodeling;GO:0006260:DNA replication;	GO:0042645:mitochondrial nucleoid;GO:0005730:nucleolus;GO:0031298:replication fork protection complex;	GO:0003917:DNA topoisomerase type I activity;GO:0005524:ATP binding;GO:0003918:DNA topoisomerase type II (ATP-hydrolyzing) activity;	K03163	-
ENSMUSG00000000938	3270	0	0	2	0.05	1	0.02	0	0	0	0	0	0	6	52208177	52217834	-	Hoxa10	homeobox A10 [Source:MGI Symbol%3BAcc:MGI:96171]	GO:0009954:proximal/distal pattern formation;GO:0009952:anterior/posterior pattern specification;GO:0006355:regulation of transcription, DNA-templated;GO:0001501:skeletal system development;GO:0030326:embryonic limb morphogenesis;	GO:0005667:transcription factor complex;	GO:0043565:sequence-specific DNA binding;GO:0003700:sequence-specific DNA binding transcription factor activity;	K17443	;ko05202 Transcriptional misregulation in cancer;
ENSMUSG00000000942	1594	17	0.75	16	0.83	19	0.67	12	0.55	24	0.89	19	0.79	6	52166651	52168733	-	Hoxa4	homeobox A4 [Source:MGI Symbol%3BAcc:MGI:96176]	GO:0048704:embryonic skeletal system morphogenesis;GO:0009952:anterior/posterior pattern specification;GO:0006355:regulation of transcription, DNA-templated;	GO:0005634:nucleus;	GO:0043565:sequence-specific DNA binding;GO:0003700:sequence-specific DNA binding transcription factor activity;	K09304	-
ENSMUSG00000000948	5216	0	0	0	0	0	0	1	0.01	0	0	0	0	7	59623897	59654812	-	Gm38393	predicted gene%2C 38393 [Source:MGI Symbol%3BAcc:MGI:5613898]	-	GO:0005634:nucleus;	-	K11100	-
ENSMUSG00000000957	5960	0	0	1	0.01	13	0.12	0	0	0	0	0	0	14	54669069	54682821	+	Mmp14	matrix metallopeptidase 14 (membrane-inserted) [Source:MGI Symbol%3BAcc:MGI:101900]	GO:0010952:positive regulation of peptidase activity;GO:0030307:positive regulation of cell growth;GO:0030324:lung development;GO:0031638:zymogen activation;GO:0048771:tissue remodeling;GO:0051895:negative regulation of focal adhesion assembly;GO:0030574:collagen catabolic process;GO:0048754:branching morphogenesis of an epithelial tube;GO:0006508:proteolysis;GO:0009725:response to hormone;GO:003…	GO:0016021:integral component of membrane;GO:0005737:cytoplasm;GO:0031012:extracellular matrix;GO:0005796:Golgi lumen;GO:0005887:integral component of plasma membrane;	GO:0005178:integrin binding;GO:0016504:peptidase activator activity;GO:0008270:zinc ion binding;GO:0005509:calcium ion binding;GO:0004222:metalloendopeptidase activity;GO:0003700:sequence-specific DNA binding transcription factor activity;GO:0005515:protein binding;GO:0046872:metal ion binding;	K07763	;ko04668 TNF signaling pathway;ko04912 GnRH signaling pathway;ko04928 Parathyroid hormone synthesis, secretion and action;
ENSMUSG00000000958	3315	32	0.68	25	0.63	51	0.86	45	0.99	48	0.86	33	0.66	14	54606899	54655237	-	Slc7a7	solute carrier family 7 (cationic amino acid transporter%2C y+ system)%2C member 7 [Source:MGI Symbol%3BAcc:MGI:1337120]	GO:0003333:amino acid transmembrane transport;	GO:0016323:basolateral plasma membrane;GO:0016021:integral component of membrane;GO:0005886:plasma membrane;	GO:0015171:amino acid transmembrane transporter activity;	K13867	;ko04974 Protein digestion and absorption;
ENSMUSG00000000959	4457	1465	23.15	1236	23.01	1888	23.81	1453	23.71	1649	21.94	1556	23.06	14	54598291	54607130	+	Oxa1l	oxidase assembly 1-like [Source:MGI Symbol%3BAcc:MGI:1916339]	GO:0051354:negative regulation of oxidoreductase activity;GO:0032981:mitochondrial respiratory chain complex I assembly;GO:0033615:mitochondrial proton-transporting ATP synthase complex assembly;GO:0051205:protein insertion into membrane;GO:0009060:aerobic respiration;GO:0051262:protein tetramerization;GO:0032780:negative regulation of ATPase activity;	GO:0005743:mitochondrial inner membrane;GO:0043234:protein complex;GO:0032592:integral component of mitochondrial membrane;	GO:0097177:mitochondrial ribosome binding;GO:0042803:protein homodimerization activity;	K03217	;ko02024 Quorum sensing;ko03060 Protein export;ko03070 Bacterial secretion system;
ENSMUSG00000000976	6419	855	9.38	735	9.5	1050	9.19	895	10.14	1125	10.39	995	10.24	11	83644522	83674580	+	Heatr6	HEAT repeat containing 6 [Source:MGI Symbol%3BAcc:MGI:1919790]	-	-	-	-	-
ENSMUSG00000000982	766	3313	304.63	2848	308.55	4399	322.81	5923	562.27	7395	572.52	6975	601.48	11	83538670	83540181	-	Ccl3	chemokine (C-C motif) ligand 3 [Source:MGI Symbol%3BAcc:MGI:98260]	GO:0030593:neutrophil chemotaxis;GO:0071407:cellular response to organic cyclic compound;GO:0009636:response to toxic substance;GO:0045671:negative regulation of osteoclast differentiation;GO:0014808:release of sequestered calcium ion into cytosol by sarcoplasmic reticulum;GO:0050918:positive chemotaxis;GO:0007010:cytoskeleton organization;GO:0043491:protein kinase B signaling;GO:0070374:positive…	GO:0005829:cytosol;GO:0005615:extracellular space;	GO:0031726:CCR1 chemokine receptor binding;GO:0016004:phospholipase activator activity;GO:0008009:chemokine activity;GO:0031730:CCR5 chemokine receptor binding;GO:0004698:calcium-dependent protein kinase C activity;GO:0042056:chemoattractant activity;	K05408	;ko04060 Cytokine-cytokine receptor interaction;ko04061 Viral protein interaction with cytokine and cytokine receptor;ko04062 Chemokine signaling pathway;ko04620 Toll-like receptor signaling pathway;ko05142 Chagas disease;ko05163 Human cytomegalovirus infection;ko05323 Rheumatoid arthritis;
ENSMUSG00000000983	1220	0	0	0	0	0	0	1	0.06	0	0	0	0	11	83599841	83602174	+	Wfdc18	WAP four-disulfide core domain 18 [Source:MGI Symbol%3BAcc:MGI:107506]	GO:0010466:negative regulation of peptidase activity;	GO:0005576:extracellular region;	GO:0030414:peptidase inhibitor activity;	-	-
ENSMUSG00000001014	1110	0	0	0	0	0	0	0	0	0	0	0	0	9	20940669	20941891	+	Icam4	intercellular adhesion molecule 4%2C Landsteiner-Wiener blood group [Source:MGI Symbol%3BAcc:MGI:1925619]	GO:0016337:single organismal cell-cell adhesion;	GO:0005576:extracellular region;GO:0016021:integral component of membrane;GO:0005886:plasma membrane;	-	K06581	-
ENSMUSG00000001016	8580	2342	19.23	2074	20.06	3092	20.26	2227	18.87	2674	18.48	2516	19.37	3	90383433	90395686	+	Ilf2	interleukin enhancer binding factor 2 [Source:MGI Symbol%3BAcc:MGI:1915031]	GO:0006955:immune response;GO:0045893:positive regulation of transcription, DNA-templated;	GO:0005730:nucleolus;GO:0030529:ribonucleoprotein complex;GO:0005737:cytoplasm;	GO:0003677:DNA binding;GO:0003725:double-stranded RNA binding;GO:0005524:ATP binding;GO:0016740:transferase activity;GO:0005515:protein binding;	K13089	-
ENSMUSG00000001017	3637	3844	74.44	3363	76.73	5199	80.35	3671	73.4	4477	73	4315	78.37	3	90406263	90416805	-	Chtop	chromatin target of PRMT1 [Source:MGI Symbol%3BAcc:MGI:1913761]	GO:0006355:regulation of transcription, DNA-templated;	GO:0005730:nucleolus;GO:0005654:nucleoplasm;GO:0005634:nucleus;	GO:0003723:RNA binding;GO:0005515:protein binding;	-	-
ENSMUSG00000001018	2290	520	15.99	461	16.71	682	16.74	546	17.34	639	16.55	595	17.16	3	90395333	90398340	-	Snapin	SNAP-associated protein [Source:MGI Symbol%3BAcc:MGI:1333745]	GO:0048490:anterograde synaptic vesicle transport;GO:0031175:neuron projection development;GO:0031629:synaptic vesicle fusion to presynaptic membrane;GO:0072553:terminal button organization;GO:0016188:synaptic vesicle maturation;GO:0008089:anterograde axon cargo transport;	GO:0030054:cell junction;GO:0043005:neuron projection;GO:0045202:synapse;GO:0031083:BLOC-1 complex;GO:0031410:cytoplasmic vesicle;GO:0048471:perinuclear region of cytoplasm;GO:0016020:membrane;GO:0005794:Golgi apparatus;	GO:0000149:SNARE binding;	-	-
ENSMUSG00000001020	584	6390	770.68	5462	776.15	9276	892.82	6153	766.13	6457	655.7	6940	784.97	3	90511078	90513352	+	S100a4	S100 calcium binding protein A4 [Source:MGI Symbol%3BAcc:MGI:1330282]	GO:0043123:positive regulation of I-kappaB kinase/NF-kappaB signaling;	GO:0043005:neuron projection;GO:0005634:nucleus;GO:0048471:perinuclear region of cytoplasm;	GO:0042802:identical protein binding;GO:0050786:RAGE receptor binding;GO:0003779:actin binding;GO:0005509:calcium ion binding;GO:0048306:calcium-dependent protein binding;	-	-
ENSMUSG00000001021	2670	0	0	3	0.09	1	0.02	3	0.08	2	0.04	3	0.07	3	90491966	90510009	+	S100a3	S100 calcium binding protein A3 [Source:MGI Symbol%3BAcc:MGI:1338849]	-	GO:0005737:cytoplasm;	GO:0005509:calcium ion binding;	-	-
ENSMUSG00000001023	432	1	0.16	0	0	0	0	0	0	0	0	0	0	3	90515830	90519087	+	S100a5	S100 calcium binding protein A5 [Source:MGI Symbol%3BAcc:MGI:1338915]	-	-	-	-	-
ENSMUSG00000001025	1367	1776	91.51	1497	90.88	2625	107.94	1835	97.61	2230	96.74	2095	101.23	3	90520189	90531488	+	S100a6	S100 calcium binding protein A6 (calcyclin) [Source:MGI Symbol%3BAcc:MGI:1339467]	GO:0034220:ion transmembrane transport;	GO:0031234:extrinsic component of cytoplasmic side of plasma membrane;GO:0001726:ruffle;GO:0005635:nuclear envelope;GO:0005829:cytosol;GO:0048471:perinuclear region of cytoplasm;	GO:0015075:ion transmembrane transporter activity;GO:0044548:S100 protein binding;GO:0005509:calcium ion binding;GO:0005523:tropomyosin binding;GO:0048306:calcium-dependent protein binding;GO:0008270:zinc ion binding;GO:0042803:protein homodimerization activity;	-	-
ENSMUSG00000001027	7041	0	0	0	0	1	0.01	3	0.03	0	0	0	0	11	106209418	106244114	-	Scn4a	sodium channel%2C voltage-gated%2C type IV%2C alpha [Source:MGI Symbol%3BAcc:MGI:98250]	GO:0034765:regulation of ion transmembrane transport;GO:0071805:potassium ion transmembrane transport;GO:0035725:sodium ion transmembrane transport;	GO:0001518:voltage-gated sodium channel complex;	GO:0005267:potassium channel activity;GO:0005248:voltage-gated sodium channel activity;	K04837	-
ENSMUSG00000001029	1904	52	1.92	42	1.83	80	2.36	48	1.83	43	1.34	42	1.46	11	106268482	106278901	-	Icam2	intercellular adhesion molecule 2 [Source:MGI Symbol%3BAcc:MGI:96394]	GO:0016337:single organismal cell-cell adhesion;	GO:0005887:integral component of plasma membrane;GO:0001931:uropod;	GO:0005178:integrin binding;	K06523	;ko04514 Cell adhesion molecules;ko04650 Natural killer cell mediated cytotoxicity;
ENSMUSG00000001034	4394	459	7.36	373	7.04	539	6.9	480	7.94	553	7.46	454	6.83	11	61379638	61385232	-	Mapk7	mitogen-activated protein kinase 7 [Source:MGI Symbol%3BAcc:MGI:1346347]	GO:0051534:negative regulation of NFAT protein import into nucleus;GO:0036003:positive regulation of transcription from RNA polymerase II promoter in response to stress;GO:0070375:ERK5 cascade;GO:0043066:negative regulation of apoptotic process;GO:0034115:negative regulation of heterotypic cell-cell adhesion;GO:0023014:signal transduction by protein phosphorylation;GO:0070301:cellular response to…	GO:0016605:PML body;GO:0005829:cytosol;	GO:0051019:mitogen-activated protein kinase binding;GO:0004707:MAP kinase activity;GO:0005524:ATP binding;	K04464	;ko04010 MAPK signaling pathway;ko04011 MAPK signaling pathway - yeast;ko04138 Autophagy - yeast;ko04139 Mitophagy - yeast;ko04540 Gap junction;ko04657 IL-17 signaling pathway;ko04722 Neurotrophin signaling pathway;ko04912 GnRH signaling pathway;ko04921 Oxytocin signaling pathway;ko05206 MicroRNAs in cancer;ko05418 Fluid shear stress and atherosclerosis;
ENSMUSG00000001036	5228	1333	17.96	1080	17.14	1678	18.04	1129	15.7	1341	15.21	1276	16.12	11	61408075	61470513	-	Epn2	epsin 2 [Source:MGI Symbol%3BAcc:MGI:1333766]	GO:0007219:Notch signaling pathway;GO:0048568:embryonic organ development;GO:0030100:regulation of endocytosis;GO:0001701:in utero embryonic development;	GO:0030128:clathrin coat of endocytic vesicle;	GO:0008289:lipid binding;	K12471	;ko04144 Endocytosis;
ENSMUSG00000001039	1593	100	4.42	98	5.11	134	4.73	107	4.88	119	4.43	127	5.27	11	61395970	61403757	+	B9d1	B9 protein domain 1 [Source:MGI Symbol%3BAcc:MGI:1351471]	GO:0035051:cardiocyte differentiation;GO:0007224:smoothened signaling pathway;GO:0043010:camera-type eye development;GO:0032880:regulation of protein localization;GO:0060563:neuroepithelial cell differentiation;GO:0042384:cilium assembly;GO:0042733:embryonic digit morphogenesis;GO:0001701:in utero embryonic development;	GO:0005813:centrosome;GO:0005737:cytoplasm;GO:0016020:membrane;GO:0036038:TCTN-B9D complex;	GO:0005515:protein binding;GO:0008158:hedgehog receptor activity;	K16744	-
ENSMUSG00000001052	6020	1257	14.71	1003	13.83	1414	13.2	1252	15.12	1511	14.89	1289	14.14	3	129776408	129855202	-	Sec24b	Sec24 related gene family%2C member B (S. cerevisiae) [Source:MGI Symbol%3BAcc:MGI:2139764]	GO:0006886:intracellular protein transport;GO:0006888:ER to Golgi vesicle-mediated transport;GO:0015031:protein transport;	GO:0030127:COPII vesicle coat;	GO:0008270:zinc ion binding;	K14007	;ko04141 Protein processing in endoplasmic reticulum;ko05130 Pathogenic Escherichia coli infection;
ENSMUSG00000001053	2728	23	0.59	36	1.1	43	0.89	28	0.75	37	0.8	25	0.61	11	51533890	51541669	-	N4bp3	NEDD4 binding protein 3 [Source:MGI Symbol%3BAcc:MGI:2442218]	-	GO:0016020:membrane;GO:0031410:cytoplasmic vesicle;GO:0030659:cytoplasmic vesicle membrane;	GO:0005515:protein binding;	-	-
ENSMUSG00000001054	2161	183	5.96	151	5.8	207	5.38	170	5.72	228	6.26	216	6.6	11	51514498	51526723	-	Rmnd5b	required for meiotic nuclear division 5 homolog B [Source:MGI Symbol%3BAcc:MGI:1913339]	-	-	-	-	-
ENSMUSG00000001056	1146	2859	175.72	2474	179.15	3927	192.62	2718	172.46	3139	162.44	2893	166.75	11	51510562	51514541	+	Nhp2	NHP2 ribonucleoprotein [Source:MGI Symbol%3BAcc:MGI:1098547]	GO:0006364:rRNA processing;	GO:0005730:nucleolus;GO:0030529:ribonucleoprotein complex;	GO:0003723:RNA binding;	K11129	;ko03008 Ribosome biogenesis in eukaryotes;
ENSMUSG00000001062	5153	192	2.62	141	2.27	274	2.99	172	2.43	216	2.49	209	2.68	8	123969095	123981087	-	Vps9d1	VPS9 domain containing 1 [Source:MGI Symbol%3BAcc:MGI:1914143]	-	-	-	-	-
ENSMUSG00000001065	5530	198	2.52	185	2.78	254	2.58	216	2.84	268	2.87	213	2.54	8	123980934	123996484	+	Zfp276	zinc finger protein (C2H2 type) 276 [Source:MGI Symbol%3BAcc:MGI:1888495]	GO:0006355:regulation of transcription, DNA-templated;GO:0006351:transcription, DNA-templated;	GO:0005634:nucleus;GO:0005622:intracellular;	GO:0003677:DNA binding;GO:0008270:zinc ion binding;GO:0046872:metal ion binding;GO:0003676:nucleic acid binding;	K10888	;ko03460 Fanconi anemia pathway;
ENSMUSG00000001076	1474	0	0	0	0	1	0.04	0	0	0	0	0	0	15	98981967	98985698	-	C1ql4	complement component 1%2C q subcomponent-like 4 [Source:MGI Symbol%3BAcc:MGI:3579909]	-	GO:0005581:collagen trimer;	GO:0005515:protein binding;	-	-
ENSMUSG00000001082	2894	1165	28.35	915	26.24	1442	28.01	1068	26.83	1270	26.02	1082	24.7	5	34790986	34794556	-	Mfsd10	major facilitator superfamily domain containing 10 [Source:MGI Symbol%3BAcc:MGI:1915544]	GO:0006915:apoptotic process;GO:0055085:transmembrane transport;	GO:0016021:integral component of membrane;	GO:0005215:transporter activity;	-	-
ENSMUSG00000001089	8112	2184	18.96	1648	16.86	2373	16.44	1834	16.44	2522	18.44	2025	16.49	4	136197072	136282091	+	Luzp1	leucine zipper protein 1 [Source:MGI Symbol%3BAcc:MGI:107629]	GO:0021503:neural fold bending;GO:0060840:artery development;GO:0003281:ventricular septum development;	GO:0005634:nucleus;	-	-	-
ENSMUSG00000001095	2412	2	0.06	2	0.07	2	0.05	7	0.21	5	0.12	4	0.11	11	78287913	78313043	-	Slc13a2	solute carrier family 13 (sodium-dependent dicarboxylate transporter)%2C member 2 [Source:MGI Symbol%3BAcc:MGI:1276558]	GO:0006814:sodium ion transport;GO:0055085:transmembrane transport;	GO:0016021:integral component of membrane;	GO:0015293:symporter activity;	K14445	-
ENSMUSG00000001098	4039	592	10.32	520	10.68	779	10.84	585	10.53	692	10.16	628	10.27	5	114501628	114518569	-	Kctd10	potassium channel tetramerisation domain containing 10 [Source:MGI Symbol%3BAcc:MGI:2141207]	GO:0051260:protein homooligomerization;	-	-	K15074	-
ENSMUSG00000001100	3783	1236	23.01	1052	23.08	1553	23.08	1250	24.03	1518	23.8	1426	24.9	11	78403019	78413562	+	Poldip2	polymerase (DNA-directed)%2C delta interacting protein 2 [Source:MGI Symbol%3BAcc:MGI:1915061]	GO:0070584:mitochondrion morphogenesis;	GO:0005634:nucleus;GO:0042645:mitochondrial nucleoid;	GO:0030674:protein binding, bridging;GO:0003677:DNA binding;	K17809	-
ENSMUSG00000001103	1359	0	0	0	0	0	0	0	0	0	0	1	0.05	11	78394273	78395907	+	Sebox	SEBOX homeobox [Source:MGI Symbol%3BAcc:MGI:108012]	GO:0006355:regulation of transcription, DNA-templated;GO:0030154:cell differentiation;GO:0009792:embryo development ending in birth or egg hatching;	GO:0005634:nucleus;	GO:0043565:sequence-specific DNA binding;GO:0003700:sequence-specific DNA binding transcription factor activity;	-	-
ENSMUSG00000001105	1525	251	11.59	234	12.73	357	13.16	242	11.54	243	9.45	289	12.52	11	78427187	78432563	+	Ift20	intraflagellar transport 20 [Source:MGI Symbol%3BAcc:MGI:1915585]	GO:0051642:centrosome localization;	GO:0044292:dendrite terminus;GO:0005929:cilium;GO:0030992:intraciliary transport particle B;GO:0005794:Golgi apparatus;GO:0005814:centriole;	-	K16473	-
ENSMUSG00000001119	4380	0	0	9	0.17	60	0.77	0	0	0	0	0	0	10	76544626	76562002	-	Col6a1	collagen%2C type VI%2C alpha 1 [Source:MGI Symbol%3BAcc:MGI:88459]	GO:0070208:protein heterotrimerization;GO:0007155:cell adhesion;GO:0071230:cellular response to amino acid stimulus;	GO:0043234:protein complex;GO:0042383:sarcolemma;GO:0005581:collagen trimer;	GO:0048407:platelet-derived growth factor binding;	K06238	;ko04151 PI3K-Akt signaling pathway;ko04510 Focal adhesion;ko04512 ECM-receptor interaction;ko04974 Protein digestion and absorption;ko05165 Human papillomavirus infection;
ENSMUSG00000001120	2933	2	0.05	1	0.03	2	0.04	2	0.05	1	0.02	1	0.02	10	76597691	76797721	-	Pcbp3	poly(rC) binding protein 3 [Source:MGI Symbol%3BAcc:MGI:1890470]	-	GO:0005829:cytosol;GO:0030529:ribonucleoprotein complex;GO:0005634:nucleus;	GO:0003723:RNA binding;GO:0003677:DNA binding;	K13162	;ko04216 Ferroptosis;
ENSMUSG00000001123	2137	800	26.37	736	28.58	1045	27.49	720	24.5	900	24.98	753	23.28	11	78853800	78875772	-	Lgals9	lectin%2C galactose binding%2C soluble 9 [Source:MGI Symbol%3BAcc:MGI:109496]	GO:0007157:heterophilic cell-cell adhesion via plasma membrane cell adhesion molecules;GO:0043123:positive regulation of I-kappaB kinase/NF-kappaB signaling;GO:0006811:ion transport;	GO:0005737:cytoplasm;GO:0005576:extracellular region;	GO:0004871:signal transducer activity;GO:0030246:carbohydrate binding;GO:0016936:galactoside binding;	K10093	-
ENSMUSG00000001127	6541	1050	11.31	825	10.47	1224	10.52	991	11.02	1234	11.19	1101	11.12	X	20664053	20726758	+	Araf	Araf proto-oncogene%2C serine/threonine kinase [Source:MGI Symbol%3BAcc:MGI:88065]	GO:0000186:activation of MAPKK activity;GO:0043066:negative regulation of apoptotic process;GO:0033138:positive regulation of peptidyl-serine phosphorylation;	GO:0005829:cytosol;GO:0005739:mitochondrion;	GO:0046872:metal ion binding;GO:0005524:ATP binding;GO:0005515:protein binding;GO:0004709:MAP kinase kinase kinase activity;	K08845	;ko01521 EGFR tyrosine kinase inhibitor resistance;ko01522 Endocrine resistance;ko04010 MAPK signaling pathway;ko04012 ErbB signaling pathway;ko04068 FoxO signaling pathway;ko04270 Vascular smooth muscle contraction;ko04650 Natural killer cell mediated cytotoxicity;ko04720 Long-term potentiation;ko04726 Serotonergic synapse;ko04730 Long-term depression;ko04810 Regulation of actin cytoskeleton;ko0…
ENSMUSG00000001128	1736	1491	60.49	1313	62.77	1930	62.49	1129	47.29	1333	45.54	1241	47.22	X	20791693	20797794	-	Cfp	complement factor properdin [Source:MGI Symbol%3BAcc:MGI:97545]	GO:0006957:complement activation, alternative pathway;	GO:0005576:extracellular region;GO:0031012:extracellular matrix;	-	K15412	;ko05168 Herpes simplex virus 1 infection;
ENSMUSG00000001131	888	12	0.95	16	1.5	26	1.65	8	0.66	14	0.93	10	0.74	X	20736405	20740974	+	Timp1	tissue inhibitor of metalloproteinase 1 [Source:MGI Symbol%3BAcc:MGI:98752]	GO:1901164:negative regulation of trophoblast cell migration;GO:0051045:negative regulation of membrane protein ectodomain proteolysis;GO:0043086:negative regulation of catalytic activity;GO:0043066:negative regulation of apoptotic process;GO:0043249:erythrocyte maturation;GO:0001775:cell activation;	GO:0005604:basement membrane;	GO:0046872:metal ion binding;GO:0002020:protease binding;GO:0008191:metalloendopeptidase inhibitor activity;	K16451	;ko04066 HIF-1 signaling pathway;
ENSMUSG00000001134	1639	138	5.93	96	4.86	168	5.76	112	4.97	102	3.69	153	6.17	X	20807961	20828256	-	Uxt	ubiquitously expressed prefoldin like chaperone [Source:MGI Symbol%3BAcc:MGI:1277988]	GO:0006457:protein folding;GO:0051297:centrosome organization;GO:0000122:negative regulation of transcription from RNA polymerase II promoter;	GO:0005813:centrosome;GO:0016272:prefoldin complex;GO:0000930:gamma-tubulin complex;GO:0005634:nucleus;	GO:0001106:RNA polymerase II transcription corepressor activity;GO:0051015:actin filament binding;GO:0051082:unfolded protein binding;GO:0048487:beta-tubulin binding;GO:0003682:chromatin binding;	-	-
ENSMUSG00000001138	6420	414	4.54	306	3.96	498	4.36	384	4.35	460	4.25	410	4.22	1	36550948	36567318	+	Cnnm3	cyclin M3 [Source:MGI Symbol%3BAcc:MGI:2151055]	GO:0006811:ion transport;	GO:0016021:integral component of membrane;GO:0005886:plasma membrane;	-	K16302	-
ENSMUSG00000001143	7359	480	4.59	433	4.88	596	4.55	453	4.48	591	4.76	497	4.46	1	36458952	36484352	-	Lman2l	lectin%2C mannose-binding 2-like [Source:MGI Symbol%3BAcc:MGI:2443010]	GO:0015031:protein transport;	GO:0005789:endoplasmic reticulum membrane;GO:0005794:Golgi apparatus;GO:0016021:integral component of membrane;GO:0016020:membrane;	GO:0046872:metal ion binding;	K10083	-
ENSMUSG00000001150	7197	1387	13.57	1079	12.44	1551	12.11	1343	13.57	1802	14.85	1437	13.19	10	76304761	76351691	+	Mcm3ap	minichromosome maintenance complex component 3 associated protein [Source:MGI Symbol%3BAcc:MGI:1930089]	-	GO:0005829:cytosol;GO:0005634:nucleus;	GO:0000166:nucleotide binding;	-	-
ENSMUSG00000001151	12154	1686	9.77	1432	9.78	2007	9.28	1663	9.95	2110	10.3	1785	9.7	10	76187097	76278620	-	Pcnt	pericentrin (kendrin) [Source:MGI Symbol%3BAcc:MGI:102722]	GO:0001764:neuron migration;GO:0021772:olfactory bulb development;GO:0021696:cerebellar cortex morphogenesis;GO:0061351:neural precursor cell proliferation;GO:0006915:apoptotic process;GO:0048854:brain morphogenesis;GO:0035264:multicellular organism growth;GO:0007051:spindle organization;GO:0035108:limb morphogenesis;GO:0042384:cilium assembly;GO:0001701:in utero embryonic development;	GO:0045171:intercellular bridge;GO:0005874:microtubule;GO:0005814:centriole;	GO:0005516:calmodulin binding;	K16481	-
ENSMUSG00000001155	3192	0	0	0	0	0	0	0	0	0	0	0	0	10	76411482	76426172	+	Ftcd	formiminotransferase cyclodeaminase [Source:MGI Symbol%3BAcc:MGI:1339962]	GO:0019557:histidine catabolic process to glutamate and formate;GO:0007010:cytoskeleton organization;GO:0035999:tetrahydrofolate interconversion;GO:0019556:histidine catabolic process to glutamate and formamide;	GO:0005814:centriole;GO:0005794:Golgi apparatus;	GO:0005542:folic acid binding;GO:0019215:intermediate filament binding;GO:0030409:glutamate formimidoyltransferase activity;GO:0030412:formimidoyltetrahydrofolate cyclodeaminase activity;	K13990	;ko00340 Histidine metabolism;ko00670 One carbon pool by folate;ko01100 Metabolic pathways;
ENSMUSG00000001156	7072	94	0.94	102	1.2	153	1.22	129	1.33	125	1.05	106	0.99	6	86624024	86646143	-	Mxd1	MAX dimerization protein 1 [Source:MGI Symbol%3BAcc:MGI:96908]	GO:0006351:transcription, DNA-templated;GO:0006355:regulation of transcription, DNA-templated;	GO:0005634:nucleus;GO:0005739:mitochondrion;GO:0005730:nucleolus;	GO:0005515:protein binding;GO:0003677:DNA binding;GO:0046983:protein dimerization activity;	K09114	-
ENSMUSG00000001157	6493	450	4.88	364	4.65	550	4.76	426	4.77	551	5.03	512	5.21	6	86668750	86710365	-	Gmcl1	germ cell-less%2C spermatogenesis associated 1 [Source:MGI Symbol%3BAcc:MGI:1345156]	GO:0006355:regulation of transcription, DNA-templated;GO:0007283:spermatogenesis;GO:0030154:cell differentiation;GO:0007275:multicellular organismal development;	GO:0016363:nuclear matrix;GO:0005635:nuclear envelope;	GO:0005515:protein binding;	K10485	-
ENSMUSG00000001158	1837	872	33.43	774	34.97	1121	34.3	860	34.04	1049	33.86	957	34.41	6	86652133	86661504	-	Snrnp27	small nuclear ribonucleoprotein 27 (U4/U6.U5) [Source:MGI Symbol%3BAcc:MGI:1913868]	-	-	-	K12846	;ko03040 Spliceosome;
ENSMUSG00000001166	2405	108	3.16	88	3.04	147	3.44	92	2.78	126	3.11	120	3.3	5	120938259	120950579	-	Oas1c	2'-5' oligoadenylate synthetase 1C [Source:MGI Symbol%3BAcc:MGI:2149633]	-	-	GO:0003725:double-stranded RNA binding;GO:0001730:2'-5'-oligoadenylate synthetase activity;	K14216	;ko04621 NOD-like receptor signaling pathway;ko05160 Hepatitis C;ko05162 Measles;ko05164 Influenza A;ko05168 Herpes simplex virus 1 infection;ko05169 Epstein-Barr virus infection;ko05171 Coronavirus disease - COVID-19;
ENSMUSG00000001168	1703	16	0.66	20	0.97	31	1.02	23	0.98	24	0.84	39	1.51	5	120999484	121011569	+	Oas1h	2'-5' oligoadenylate synthetase 1H [Source:MGI Symbol%3BAcc:MGI:2180853]	GO:0051607:defense response to virus;GO:0006955:immune response;	-	GO:0003725:double-stranded RNA binding;GO:0005524:ATP binding;GO:0001730:2'-5'-oligoadenylate synthetase activity;	K14216	;ko04621 NOD-like receptor signaling pathway;ko05160 Hepatitis C;ko05162 Measles;ko05164 Influenza A;ko05168 Herpes simplex virus 1 infection;ko05169 Epstein-Barr virus infection;ko05171 Coronavirus disease - COVID-19;
ENSMUSG00000001173	9486	672	4.99	513	4.49	669	3.96	656	5.03	854	5.34	752	5.24	X	47001264	47054745	+	Ocrl	OCRL%2C inositol polyphosphate-5-phosphatase [Source:MGI Symbol%3BAcc:MGI:109589]	GO:0046856:phosphatidylinositol dephosphorylation;GO:0042384:cilium assembly;GO:0001701:in utero embryonic development;GO:0046854:phosphatidylinositol phosphorylation;	GO:0001750:photoreceptor outer segment;GO:0005802:trans-Golgi network;GO:0005794:Golgi apparatus;GO:0005769:early endosome;GO:0030136:clathrin-coated vesicle;GO:0005886:plasma membrane;GO:0005634:nucleus;GO:0030670:phagocytic vesicle membrane;GO:0005905:coated pit;GO:0031901:early endosome membrane;	GO:0048365:Rac GTPase binding;GO:0004439:phosphatidylinositol-4,5-bisphosphate 5-phosphatase activity;	K01099	;ko00562 Inositol phosphate metabolism;ko01100 Metabolic pathways;ko04070 Phosphatidylinositol signaling system;
ENSMUSG00000001175	4706	13417	200.81	11632	205.12	17729	211.76	11994	185.33	14730	185.62	13719	192.57	12	100165694	100176073	+	Calm1	calmodulin 1 [Source:MGI Symbol%3BAcc:MGI:88251]	-	-	-	K02183	;ko04014 Ras signaling pathway;ko04015 Rap1 signaling pathway;ko04016 MAPK signaling pathway - plant;ko04020 Calcium signaling pathway;ko04022 cGMP-PKG signaling pathway;ko04024 cAMP signaling pathway;ko04070 Phosphatidylinositol signaling system;ko04114 Oocyte meiosis;ko04218 Cellular senescence;ko04261 Adrenergic signaling in cardiomyocytes;ko04270 Vascular smooth muscle contraction;ko04371 Ape…
ENSMUSG00000001211	7790	1164	10.52	1052	11.21	1529	11.03	1114	10.4	1294	9.85	1162	9.85	10	78105012	78188323	-	Agpat3	1-acylglycerol-3-phosphate O-acyltransferase 3 [Source:MGI Symbol%3BAcc:MGI:1336186]	GO:0008654:phospholipid biosynthetic process;	GO:0005886:plasma membrane;GO:0016021:integral component of membrane;GO:0005783:endoplasmic reticulum;	GO:0003841:1-acylglycerol-3-phosphate O-acyltransferase activity;	K13523	;ko00561 Glycerolipid metabolism;ko00564 Glycerophospholipid metabolism;ko01100 Metabolic pathways;ko01110 Biosynthesis of secondary metabolites;ko04072 Phospholipase D signaling pathway;
ENSMUSG00000001225	6369	0	0	0	0	0	0	0	0	0	0	0	0	12	31440870	31523916	+	Slc26a3	solute carrier family 26%2C member 3 [Source:MGI Symbol%3BAcc:MGI:107181]	GO:0008272:sulfate transport;GO:0034220:ion transmembrane transport;GO:0006820:anion transport;	GO:0005887:integral component of plasma membrane;GO:0016324:apical plasma membrane;GO:0031526:brush border membrane;	GO:0015301:anion:anion antiporter activity;GO:0008271:secondary active sulfate transmembrane transporter activity;GO:0015116:sulfate transmembrane transporter activity;	K14078	;ko04972 Pancreatic secretion;ko04978 Mineral absorption;
ENSMUSG00000001227	3968	585	10.38	522	10.92	743	10.53	555	10.17	759	11.34	664	11.05	17	56430085	56447343	-	Sema6b	sema domain%2C transmembrane domain (TM)%2C and cytoplasmic domain%2C (semaphorin) 6B [Source:MGI Symbol%3BAcc:MGI:1202889]	GO:0030154:cell differentiation;GO:0007399:nervous system development;	GO:0016021:integral component of membrane;GO:0005886:plasma membrane;	GO:0030215:semaphorin receptor binding;GO:0004872:receptor activity;	K06842	;ko04360 Axon guidance;
ENSMUSG00000001228	4259	4203	69.51	3576	69.68	5343	70.52	4003	68.34	4780	66.56	4177	64.78	17	56610321	56630486	+	Uhrf1	ubiquitin-like%2C containing PHD and RING finger domains%2C 1 [Source:MGI Symbol%3BAcc:MGI:1338889]	GO:0032270:positive regulation of cellular protein metabolic process;GO:0051865:protein autoubiquitination;GO:0000122:negative regulation of transcription from RNA polymerase II promoter;GO:0010390:histone monoubiquitination;GO:0042787:protein ubiquitination involved in ubiquitin-dependent protein catabolic process;GO:0008283:cell proliferation;GO:0010216:maintenance of DNA methylation;GO:0007049…	GO:0000791:euchromatin;GO:0000792:heterochromatin;GO:0016363:nuclear matrix;GO:0000790:nuclear chromatin;GO:0005657:replication fork;	GO:0008270:zinc ion binding;GO:0031493:nucleosomal histone binding;GO:0004842:ubiquitin-protein transferase activity;GO:0042802:identical protein binding;GO:0008327:methyl-CpG binding;GO:0000987:core promoter proximal region sequence-specific DNA binding;GO:0044729:hemi-methylated DNA-binding;GO:0035064:methylated histone binding;	K10638	-
ENSMUSG00000001229	7883	1343	12	1170	12.32	1680	11.98	1251	11.54	1509	11.35	1318	11.04	17	56493807	56525905	-	Dpp9	dipeptidylpeptidase 9 [Source:MGI Symbol%3BAcc:MGI:2443967]	-	-	-	K08656	-
ENSMUSG00000001240	3301	7	0.15	2	0.05	1	0.02	1	0.02	4	0.07	2	0.04	11	101136854	101150372	+	Ramp2	receptor (calcitonin) activity modifying protein 2 [Source:MGI Symbol%3BAcc:MGI:1859650]	GO:0043116:negative regulation of vascular permeability;GO:2001214:positive regulation of vasculogenesis;GO:0010628:positive regulation of gene expression;GO:0097084:vascular smooth muscle cell development;GO:0035924:cellular response to vascular endothelial growth factor stimulus;GO:0007507:heart development;GO:0045766:positive regulation of angiogenesis;GO:0006816:calcium ion transport;GO:00308…	GO:0016021:integral component of membrane;GO:0005737:cytoplasm;GO:0009986:cell surface;GO:0043235:receptor complex;GO:0005886:plasma membrane;	GO:0008565:protein transporter activity;GO:0015026:coreceptor activity;GO:0046982:protein heterodimerization activity;GO:0001664:G-protein coupled receptor binding;	K08448;K12189	;ko04270 Vascular smooth muscle contraction;;ko04144 Endocytosis;
ENSMUSG00000001247	2172	13	0.42	9	0.34	18	0.47	10	0.33	22	0.6	13	0.4	7	30657195	30672889	-	Lsr	lipolysis stimulated lipoprotein receptor [Source:MGI Symbol%3BAcc:MGI:1927471]	GO:0009790:embryo development;GO:0001889:liver development;GO:0019216:regulation of lipid metabolic process;GO:0042953:lipoprotein transport;	GO:0005886:plasma membrane;GO:0034358:plasma lipoprotein particle;GO:0034362:low-density lipoprotein particle;GO:0042627:chylomicron;GO:0016021:integral component of membrane;GO:0034361:very-low-density lipoprotein particle;	GO:0017129:triglyceride binding;GO:0030228:lipoprotein particle receptor activity;GO:0005504:fatty acid binding;GO:0030169:low-density lipoprotein particle binding;	-	-
ENSMUSG00000001248	5239	872	11.72	658	10.42	1084	11.63	799	11.09	945	10.7	899	11.33	7	30829552	30855321	-	Gramd1a	GRAM domain containing 1A [Source:MGI Symbol%3BAcc:MGI:105490]	-	GO:0016021:integral component of membrane;	-	-	-
ENSMUSG00000001249	4101	0	0	0	0	2	0.03	1	0.02	3	0.04	2	0.03	7	30798150	30814715	-	Hpn	hepsin [Source:MGI Symbol%3BAcc:MGI:1196620]	GO:2000347:positive regulation of hepatocyte proliferation;GO:0010756:positive regulation of plasminogen activation;GO:0050680:negative regulation of epithelial cell proliferation;GO:0043923:positive regulation by host of viral transcription;GO:0097195:pilomotor reflex;GO:0090103:cochlea morphogenesis;GO:0006508:proteolysis;GO:0050910:detection of mechanical stimulus involved in sensory perceptio…	GO:0009986:cell surface;GO:0005887:integral component of plasma membrane;GO:0005911:cell-cell junction;GO:0043025:neuronal cell body;GO:0005789:endoplasmic reticulum membrane;GO:0005886:plasma membrane;GO:0016021:integral component of membrane;	GO:0005044:scavenger receptor activity;GO:0070008:serine-type exopeptidase activity;GO:0015269:calcium-activated potassium channel activity;GO:0004252:serine-type endopeptidase activity;GO:0008236:serine-type peptidase activity;	K08665	;ko05203 Viral carcinogenesis;
ENSMUSG00000001260	7869	0	0	0	0	0	0	0	0	0	0	0	0	5	70908390	70999960	-	Gabrg1	gamma-aminobutyric acid (GABA) A receptor%2C subunit gamma 1 [Source:MGI Symbol%3BAcc:MGI:103156]	GO:0007214:gamma-aminobutyric acid signaling pathway;GO:0006821:chloride transport;GO:0007268:synaptic transmission;	GO:0030054:cell junction;GO:0043235:receptor complex;GO:0034707:chloride channel complex;GO:0045211:postsynaptic membrane;GO:0005886:plasma membrane;	GO:0050811:GABA receptor binding;GO:0005230:extracellular ligand-gated ion channel activity;GO:0004890:GABA-A receptor activity;GO:0005254:chloride channel activity;	K05186	;ko04080 Neuroactive ligand-receptor interaction;ko04723 Retrograde endocannabinoid signaling;ko04727 GABAergic synapse;ko05032 Morphine addiction;ko05033 Nicotine addiction;
ENSMUSG00000001270	2895	1123	27.32	934	26.77	1476	28.66	1021	25.65	1239	25.38	1125	25.67	12	111635795	111638772	-	Ckb	creatine kinase%2C brain [Source:MGI Symbol%3BAcc:MGI:88407]	GO:0007420:brain development;GO:0030644:cellular chloride ion homeostasis;GO:0016310:phosphorylation;	GO:0005739:mitochondrion;	GO:0004111:creatine kinase activity;GO:0005524:ATP binding;	K00933	;ko00330 Arginine and proline metabolism;ko01100 Metabolic pathways;
ENSMUSG00000001280	8262	3129	26.68	2425	24.36	3452	23.49	2943	25.9	3872	27.79	3158	25.25	15	102314578	102344839	+	Sp1	trans-acting transcription factor 1 [Source:MGI Symbol%3BAcc:MGI:98372]	GO:0001829:trophectodermal cell differentiation;GO:0043923:positive regulation by host of viral transcription;GO:0030324:lung development;GO:0060136:embryonic process involved in female pregnancy;GO:0048596:embryonic camera-type eye morphogenesis;GO:0030219:megakaryocyte differentiation;GO:0001892:embryonic placenta development;GO:0048706:embryonic skeletal system development;GO:0001503:ossificat…	GO:0005737:cytoplasm;GO:0032993:protein-DNA complex;GO:0005634:nucleus;GO:0005654:nucleoplasm;GO:0005730:nucleolus;GO:0044424:intracellular part;	GO:0042826:histone deacetylase binding;GO:0001077:RNA polymerase II core promoter proximal region sequence-specific DNA binding transcription factor activity involved in positive regulation of transcription;GO:0008270:zinc ion binding;GO:0001103:RNA polymerase II repressing transcription factor binding;GO:0008022:protein C-terminus binding;GO:0000979:RNA polymerase II core promoter sequence-speci…	K04684	;ko01522 Endocrine resistance;ko04137 Mitophagy - animal;ko04350 TGF-beta signaling pathway;ko04915 Estrogen signaling pathway;ko04927 Cortisol synthesis and secretion;ko04928 Parathyroid hormone synthesis, secretion and action;ko04934 Cushing syndrome;ko05016 Huntington disease;ko05017 Spinocerebellar ataxia;ko05163 Human cytomegalovirus infection;ko05200 Pathways in cancer;ko05202 Transcription…
ENSMUSG00000001281	2770	64	1.63	52	1.56	69	1.4	67	1.76	98	2.1	73	1.74	15	102124430	102140379	-	Itgb7	integrin beta 7 [Source:MGI Symbol%3BAcc:MGI:96616]	GO:0007160:cell-matrix adhesion;GO:0050900:leukocyte migration;GO:0007229:integrin-mediated signaling pathway;GO:0007275:multicellular organismal development;	GO:0005737:cytoplasm;GO:0005615:extracellular space;GO:0008305:integrin complex;	GO:0004872:receptor activity;GO:0050839:cell adhesion molecule binding;	K06590	;ko04151 PI3K-Akt signaling pathway;ko04510 Focal adhesion;ko04512 ECM-receptor interaction;ko04514 Cell adhesion molecules;ko04672 Intestinal immune network for IgA production;ko04810 Regulation of actin cytoskeleton;ko05165 Human papillomavirus infection;ko05202 Transcriptional misregulation in cancer;ko05410 Hypertrophic cardiomyopathy;ko05412 Arrhythmogenic right ventricular cardiomyopathy;ko…
ENSMUSG00000001285	2823	557	13.9	514	15.11	893	17.78	605	15.58	666	13.99	687	16.08	15	102240144	102246574	+	Myg1	melanocyte proliferating gene 1 [Source:MGI Symbol%3BAcc:MGI:1929864]	-	GO:0005634:nucleus;GO:0005739:mitochondrion;	-	-	-
ENSMUSG00000001288	4261	97	1.6	72	1.4	91	1.2	52	0.89	88	1.22	77	1.19	15	102143373	102165952	-	Rarg	retinoic acid receptor%2C gamma [Source:MGI Symbol%3BAcc:MGI:97858]	GO:0000122:negative regulation of transcription from RNA polymerase II promoter;GO:0048048:embryonic eye morphogenesis;GO:0048384:retinoic acid receptor signaling pathway;GO:0035116:embryonic hindlimb morphogenesis;GO:0031641:regulation of myelination;GO:0070384:Harderian gland development;GO:0060740:prostate gland epithelium morphogenesis;GO:0008285:negative regulation of cell proliferation;GO:0…	GO:0005667:transcription factor complex;	GO:0046965:retinoid X receptor binding;GO:0008270:zinc ion binding;GO:0003707:steroid hormone receptor activity;GO:0043565:sequence-specific DNA binding;GO:0003708:retinoic acid receptor activity;	K08529	-
ENSMUSG00000001289	1394	829	41.89	809	48.16	1226	49.44	873	45.54	1004	42.71	992	47.01	15	102234551	102240308	+	Pfdn5	prefoldin 5 [Source:MGI Symbol%3BAcc:MGI:1928753]	GO:0051084:'de novo' posttranslational protein folding;GO:0090090:negative regulation of canonical Wnt signaling pathway;GO:0060041:retina development in camera-type eye;GO:0045892:negative regulation of transcription, DNA-templated;	GO:0016272:prefoldin complex;GO:0005634:nucleus;	GO:0003714:transcription corepressor activity;GO:0051082:unfolded protein binding;	K04797	-
ENSMUSG00000001300	6855	2	0.02	1	0.01	3	0.02	1	0.01	4	0.03	4	0.04	8	8667434	8711242	-	Efnb2	ephrin B2 [Source:MGI Symbol%3BAcc:MGI:105097]	GO:0002042:cell migration involved in sprouting angiogenesis;GO:0010839:negative regulation of keratinocyte proliferation;GO:0001945:lymph vessel development;GO:0050920:regulation of chemotaxis;GO:0009887:organ morphogenesis;GO:0007399:nervous system development;GO:0007155:cell adhesion;GO:0048013:ephrin receptor signaling pathway;GO:2000727:positive regulation of cardiac muscle cell differentiat…	GO:0016021:integral component of membrane;GO:0005886:plasma membrane;	GO:0046875:ephrin receptor binding;	K05463	;ko04360 Axon guidance;
ENSMUSG00000001305	3239	916	19.92	774	19.83	1197	20.77	870	19.53	1037	18.99	1005	20.5	1	186453175	186481555	-	Rrp15	ribosomal RNA processing 15 homolog [Source:MGI Symbol%3BAcc:MGI:1914473]	-	GO:0005634:nucleus;	-	-	-
ENSMUSG00000001313	1990	140	4.96	117	4.88	207	5.85	175	6.39	201	5.99	180	5.97	11	101355825	101362679	+	Rnd2	Rho family GTPase 2 [Source:MGI Symbol%3BAcc:MGI:1338755]	GO:0007264:small GTPase mediated signal transduction;	GO:0005769:early endosome;GO:0016020:membrane;GO:0031410:cytoplasmic vesicle;	GO:0005525:GTP binding;GO:0047485:protein N-terminus binding;	K07858	-
ENSMUSG00000001323	4560	111	1.71	95	1.73	151	1.86	123	1.96	147	1.91	131	1.9	11	74797185	74816774	-	Srr	serine racemase [Source:MGI Symbol%3BAcc:MGI:1351636]	GO:0042866:pyruvate biosynthetic process;GO:0006563:L-serine metabolic process;GO:0051289:protein homotetramerization;GO:0070179:D-serine biosynthetic process;GO:0032496:response to lipopolysaccharide;GO:0007568:aging;GO:0007420:brain development;GO:0043278:response to morphine;GO:0042493:response to drug;	GO:0043025:neuronal cell body;GO:0005737:cytoplasm;GO:0045177:apical part of cell;GO:0005886:plasma membrane;	GO:0016594:glycine binding;GO:0005509:calcium ion binding;GO:0003941:L-serine ammonia-lyase activity;GO:0005524:ATP binding;GO:0030165:PDZ domain binding;GO:0030378:serine racemase activity;GO:0008721:D-serine ammonia-lyase activity;GO:0018114:threonine racemase activity;GO:0000287:magnesium ion binding;GO:0042803:protein homodimerization activity;GO:0030170:pyridoxal phosphate binding;	K12235	;ko00260 Glycine, serine and threonine metabolism;ko01100 Metabolic pathways;
ENSMUSG00000001333	2862	2	0.05	1	0.03	8	0.16	3	0.08	4	0.08	5	0.12	4	129181410	129202352	+	Sync	syncoilin [Source:MGI Symbol%3BAcc:MGI:1916078]	GO:0045103:intermediate filament-based process;	GO:0030018:Z disc;GO:0031594:neuromuscular junction;GO:0042383:sarcolemma;GO:0005882:intermediate filament;GO:0005829:cytosol;	GO:0005515:protein binding;GO:0005198:structural molecule activity;	K10377	-
ENSMUSG00000001334	2763	0	0	0	0	1	0.02	0	0	0	0	0	0	4	129030792	129038386	+	Fndc5	fibronectin type III domain containing 5 [Source:MGI Symbol%3BAcc:MGI:1917614]	GO:0014850:response to muscle activity;GO:0090336:positive regulation of brown fat cell differentiation;	GO:0005777:peroxisome;GO:0005886:plasma membrane;GO:0016021:integral component of membrane;GO:0005576:extracellular region;GO:0005783:endoplasmic reticulum;	GO:0005179:hormone activity;	-	-
ENSMUSG00000001348	2030	35	1.21	26	1.06	23	0.64	69	2.47	74	2.16	68	2.21	9	22038023	22047007	-	Acp5	acid phosphatase 5%2C tartrate resistant [Source:MGI Symbol%3BAcc:MGI:87883]	GO:0050728:negative regulation of inflammatory response;GO:0032496:response to lipopolysaccharide;GO:0030316:osteoclast differentiation;GO:0033555:multicellular organismal response to stress;GO:0045453:bone resorption;GO:0060349:bone morphogenesis;GO:0045019:negative regulation of nitric oxide biosynthetic process;GO:0007162:negative regulation of cell adhesion;GO:0001503:ossification;GO:0034097:…	GO:0005615:extracellular space;GO:0005764:lysosome;GO:0016021:integral component of membrane;	GO:0008199:ferric iron binding;GO:0008198:ferrous iron binding;GO:0003993:acid phosphatase activity;	K14379	;ko00740 Riboflavin metabolism;ko01100 Metabolic pathways;ko04142 Lysosome;ko04380 Osteoclast differentiation;ko05323 Rheumatoid arthritis;
ENSMUSG00000001349	2736	0	0	0	0	0	0	0	0	0	0	0	0	9	22010512	22020926	+	Cnn1	calponin 1 [Source:MGI Symbol%3BAcc:MGI:104979]	GO:0031032:actomyosin structure organization;	GO:0005856:cytoskeleton;	GO:0005516:calmodulin binding;GO:0003779:actin binding;	-	-
ENSMUSG00000001366	3103	272	6.17	232	6.2	339	6.14	286	6.7	311	5.94	295	6.28	9	77988781	78016347	-	Fbxo9	f-box protein 9 [Source:MGI Symbol%3BAcc:MGI:1918788]	GO:0032006:regulation of TOR signaling;GO:0016567:protein ubiquitination;GO:0031146:SCF-dependent proteasomal ubiquitin-dependent protein catabolic process;	GO:0005737:cytoplasm;GO:0019005:SCF ubiquitin ligase complex;	GO:0005515:protein binding;GO:0004842:ubiquitin-protein transferase activity;	K10295	-
ENSMUSG00000001376	10856	943	6.12	761	5.82	1268	6.57	1037	6.95	1265	6.91	1120	6.81	6	3498382	3603531	+	Vps50	VPS50 EARP/GARPII complex subunit [Source:MGI Symbol%3BAcc:MGI:1920538]	-	-	-	-	-
ENSMUSG00000001380	2447	2292	65.97	1968	66.74	2976	68.36	2121	63.03	2549	61.78	2437	65.79	18	36899581	36916258	-	Hars	histidyl-tRNA synthetase [Source:MGI Symbol%3BAcc:MGI:108087]	GO:0006427:histidyl-tRNA aminoacylation;	GO:0005737:cytoplasm;	GO:0005524:ATP binding;GO:0004821:histidine-tRNA ligase activity;	K01892	;ko00970 Aminoacyl-tRNA biosynthesis;
ENSMUSG00000001383	2592	1860	50.54	1592	50.97	2492	54.04	1832	51.39	2081	47.61	1937	49.36	18	36926929	36932719	+	Zmat2	zinc finger%2C matrin type 2 [Source:MGI Symbol%3BAcc:MGI:1913742]	-	-	-	K12848	;ko03040 Spliceosome;
ENSMUSG00000001403	2600	2203	59.68	1884	60.13	3010	65.07	1982	55.43	2240	51.09	2126	54.01	2	164611818	164620742	+	Ube2c	ubiquitin-conjugating enzyme E2C [Source:MGI Symbol%3BAcc:MGI:1915862]	GO:0008054:negative regulation of cyclin-dependent protein serine/threonine kinase by cyclin degradation;GO:0070936:protein K48-linked ubiquitination;GO:0070979:protein K11-linked ubiquitination;GO:0051301:cell division;GO:0031145:anaphase-promoting complex-dependent proteasomal ubiquitin-dependent protein catabolic process;GO:0031536:positive regulation of exit from mitosis;GO:0010994:free ubiqu…	GO:0005680:anaphase-promoting complex;	GO:0004842:ubiquitin-protein transferase activity;GO:0005524:ATP binding;	K06688	;ko04120 Ubiquitin mediated proteolysis;
ENSMUSG00000001415	6956	2916	29.53	2372	28.3	3579	28.92	2780	29.06	3478	29.65	2983	28.33	3	88243567	88269645	+	Smg5	Smg-5 homolog%2C nonsense mediated mRNA decay factor (C. elegans) [Source:MGI Symbol%3BAcc:MGI:2447364]	GO:0000184:nuclear-transcribed mRNA catabolic process, nonsense-mediated decay;GO:0035303:regulation of dephosphorylation;	GO:0005737:cytoplasm;GO:0005634:nucleus;	GO:0051721:protein phosphatase 2A binding;	K11125	;ko03015 mRNA surveillance pathway;
ENSMUSG00000001416	6370	8789	97.18	7757	101.06	11834	104.43	8557	97.68	10237	95.31	9622	99.78	3	88204423	88229074	+	Cct3	chaperonin containing Tcp1%2C subunit 3 (gamma) [Source:MGI Symbol%3BAcc:MGI:104708]	GO:0051084:'de novo' posttranslational protein folding;GO:0006457:protein folding;GO:0007339:binding of sperm to zona pellucida;GO:0044267:cellular protein metabolic process;	GO:0005832:chaperonin-containing T-complex;GO:0005886:plasma membrane;GO:0005874:microtubule;GO:0097223:sperm part;GO:0002199:zona pellucida receptor complex;	GO:0005524:ATP binding;GO:0051082:unfolded protein binding;GO:0000166:nucleotide binding;	K09495	-
ENSMUSG00000001418	6291	1571	17.59	1267	16.71	2001	17.88	1899	21.95	2427	22.88	2190	23	3	88232330	88238620	+	Glmp	glycosylated lysosomal membrane protein [Source:MGI Symbol%3BAcc:MGI:1913318]	GO:0030522:intracellular receptor signaling pathway;GO:0045944:positive regulation of transcription from RNA polymerase II promoter;GO:0050794:regulation of cellular process;	GO:0005829:cytosol;GO:0005764:lysosome;GO:0016021:integral component of membrane;GO:0005634:nucleus;GO:0005765:lysosomal membrane;	GO:0044212:transcription regulatory region DNA binding;GO:0004879:ligand-activated sequence-specific DNA binding RNA polymerase II transcription factor activity;GO:0000988:protein binding transcription factor activity;GO:0003700:sequence-specific DNA binding transcription factor activity;	-	-
ENSMUSG00000001419	5985	2634	31	2179	30.21	3173	29.8	2291	27.83	3030	30.02	2558	28.23	3	88049679	88079393	+	Mef2d	myocyte enhancer factor 2D [Source:MGI Symbol%3BAcc:MGI:99533]	GO:0002062:chondrocyte differentiation;GO:0001649:osteoblast differentiation;GO:0006915:apoptotic process;GO:0035914:skeletal muscle cell differentiation;GO:0045944:positive regulation of transcription from RNA polymerase II promoter;GO:0007399:nervous system development;GO:0001958:endochondral ossification;GO:0007512:adult heart development;	GO:0005730:nucleolus;GO:0005634:nucleus;	GO:0042826:histone deacetylase binding;GO:0033613:activating transcription factor binding;GO:0000977:RNA polymerase II regulatory region sequence-specific DNA binding;GO:0000981:sequence-specific DNA binding RNA polymerase II transcription factor activity;GO:0046982:protein heterodimerization activity;GO:0042803:protein homodimerization activity;	K09262	;ko04022 cGMP-PKG signaling pathway;ko04371 Apelin signaling pathway;ko04928 Parathyroid hormone synthesis, secretion and action;
ENSMUSG00000001420	2912	36	0.87	36	1.03	53	1.02	40	1	41	0.83	42	0.95	3	88235962	88243455	-	Tmem79	transmembrane protein 79 [Source:MGI Symbol%3BAcc:MGI:1919163]	-	GO:0016021:integral component of membrane;	-	-	-
ENSMUSG00000001424	9757	4723	34.09	4061	34.54	6326	36.44	4423	32.96	5490	33.37	4857	32.88	6	28475138	28935161	+	Snd1	staphylococcal nuclease and tudor domain containing 1 [Source:MGI Symbol%3BAcc:MGI:1929266]	GO:0006355:regulation of transcription, DNA-templated;GO:0031047:gene silencing by RNA;GO:0090305:nucleic acid phosphodiester bond hydrolysis;	GO:0005739:mitochondrion;GO:0016442:RISC complex;GO:0005634:nucleus;GO:0042470:melanosome;	GO:0003676:nucleic acid binding;GO:0005515:protein binding;GO:0004518:nuclease activity;GO:0003713:transcription coactivator activity;	K15979	;ko05203 Viral carcinogenesis;
ENSMUSG00000001435	7021	21	0.21	19	0.22	34	0.27	16	0.17	28	0.24	31	0.29	10	76888012	77002382	-	Col18a1	collagen%2C type XVIII%2C alpha 1 [Source:MGI Symbol%3BAcc:MGI:88451]	GO:0001525:angiogenesis;GO:0016055:Wnt signaling pathway;GO:0001886:endothelial cell morphogenesis;GO:0043065:positive regulation of apoptotic process;GO:0007155:cell adhesion;GO:0030335:positive regulation of cell migration;GO:0008284:positive regulation of cell proliferation;GO:0030198:extracellular matrix organization;GO:0042493:response to drug;GO:0051599:response to hydrostatic pressure;	GO:0005581:collagen trimer;GO:0005604:basement membrane;GO:0005615:extracellular space;GO:0030938:collagen type XVIII trimer;	GO:0046872:metal ion binding;GO:0042802:identical protein binding;GO:0005198:structural molecule activity;	K06823	;ko04974 Protein digestion and absorption;
ENSMUSG00000001436	4644	1348	20.44	1140	20.37	1756	21.25	1171	18.34	1424	18.18	1211	17.23	10	76868075	76896836	+	Slc19a1	solute carrier family 19 (folate transporter)%2C member 1 [Source:MGI Symbol%3BAcc:MGI:103182]	GO:0015884:folic acid transport;GO:0051958:methotrexate transport;GO:0007565:female pregnancy;	GO:0016323:basolateral plasma membrane;GO:0016021:integral component of membrane;	GO:0015350:methotrexate transporter activity;GO:0005542:folic acid binding;GO:0008518:reduced folate carrier activity;	K14609	;ko01523 Antifolate resistance;ko04977 Vitamin digestion and absorption;
ENSMUSG00000001440	6590	14472	154.68	12174	153.31	17851	152.26	12913	142.49	16276	146.47	13930	139.63	11	97050540	97078707	-	Kpnb1	karyopherin (importin) beta 1 [Source:MGI Symbol%3BAcc:MGI:107532]	GO:0006610:ribosomal protein import into nucleus;	GO:0005737:cytoplasm;GO:0005643:nuclear pore;	GO:0019904:protein domain specific binding;GO:0008565:protein transporter activity;	K14293	;ko03013 RNA transport;
ENSMUSG00000001441	7206	1666	16.28	1328	15.29	2121	16.54	1561	15.75	2012	16.56	1722	15.79	11	97096668	97171464	-	Npepps	aminopeptidase puromycin sensitive [Source:MGI Symbol%3BAcc:MGI:1101358]	GO:0071456:cellular response to hypoxia;GO:0006508:proteolysis;GO:0006886:intracellular protein transport;GO:0000209:protein polyubiquitination;GO:0002474:antigen processing and presentation of peptide antigen via MHC class I;	GO:0005737:cytoplasm;GO:0005634:nucleus;GO:0005643:nuclear pore;GO:0005829:cytosol;	GO:0004177:aminopeptidase activity;GO:0008270:zinc ion binding;GO:0008237:metallopeptidase activity;GO:0008565:protein transporter activity;	K08776	-
ENSMUSG00000001444	2488	0	0	0	0	0	0	0	0	0	0	0	0	11	96988897	97006157	-	Tbx21	T-box 21 [Source:MGI Symbol%3BAcc:MGI:1888984]	GO:0030217:T cell differentiation;GO:0045893:positive regulation of transcription, DNA-templated;GO:0048304:positive regulation of isotype switching to IgG isotypes;GO:0072676:lymphocyte migration;	GO:0043025:neuronal cell body;GO:0005634:nucleus;	GO:0005515:protein binding;GO:0044212:transcription regulatory region DNA binding;GO:0003700:sequence-specific DNA binding transcription factor activity;	K10166	;ko04658 Th1 and Th2 cell differentiation;ko04659 Th17 cell differentiation;ko05321 Inflammatory bowel disease;
ENSMUSG00000001445	1708	918	37.86	703	34.16	1138	37.45	837	35.63	1015	35.24	913	35.31	11	96932386	96940039	+	Mrpl10	mitochondrial ribosomal protein L10 [Source:MGI Symbol%3BAcc:MGI:1333801]	GO:0042254:ribosome biogenesis;GO:0006412:translation;	GO:0005762:mitochondrial large ribosomal subunit;	GO:0003735:structural constituent of ribosome;	K02864	;ko03010 Ribosome;
ENSMUSG00000001467	4415	3191	50.91	2750	51.69	4058	51.67	3936	64.83	4815	64.68	4354	65.14	5	4131145	4154746	-	Cyp51	cytochrome P450%2C family 51 [Source:MGI Symbol%3BAcc:MGI:106040]	-	-	-	K05917	;ko00100 Steroid biosynthesis;ko01100 Metabolic pathways;ko01110 Biosynthesis of secondary metabolites;
ENSMUSG00000001472	5390	3163	41.33	2667	41.06	4155	43.33	3140	42.36	4017	44.2	3309	40.55	8	124100492	124130574	+	Tcf25	transcription factor 25 (basic helix-loop-helix) [Source:MGI Symbol%3BAcc:MGI:1914105]	GO:0000122:negative regulation of transcription from RNA polymerase II promoter;	GO:0005634:nucleus;	GO:0003677:DNA binding;GO:0003700:sequence-specific DNA binding transcription factor activity;	-	-
ENSMUSG00000001473	2437	4134	119.48	3462	117.89	5040	116.25	3614	107.84	4556	110.87	4302	116.61	18	67523787	67535819	+	Tubb6	tubulin%2C beta 6 class V [Source:MGI Symbol%3BAcc:MGI:1915201]	GO:0007017:microtubule-based process;GO:0051258:protein polymerization;	GO:0005737:cytoplasm;GO:0005886:plasma membrane;GO:0005874:microtubule;	GO:0005200:structural constituent of cytoskeleton;GO:0005525:GTP binding;GO:0003924:GTPase activity;	K07375	;ko04145 Phagosome;ko04540 Gap junction;ko05010 Alzheimer disease;ko05012 Parkinson disease;ko05014 Amyotrophic lateral sclerosis;ko05016 Huntington disease;ko05020 Prion disease;ko05022 Pathways of neurodegeneration - multiple diseases;ko05130 Pathogenic Escherichia coli infection;ko05132 Salmonella infection;
ENSMUSG00000001482	4408	616	9.84	544	10.24	799	10.19	536	8.84	753	10.13	664	9.95	8	124150266	124190009	+	Def8	differentially expressed in FDCP 8 [Source:MGI Symbol%3BAcc:MGI:1346331]	GO:0035556:intracellular signal transduction;	-	GO:0008270:zinc ion binding;	K09228	;ko05168 Herpes simplex virus 1 infection;
ENSMUSG00000001493	2228	0	0	0	0	0	0	0	0	0	0	0	0	11	101768336	101785200	-	Meox1	mesenchyme homeobox 1 [Source:MGI Symbol%3BAcc:MGI:103220]	GO:0001757:somite specification;GO:0045944:positive regulation of transcription from RNA polymerase II promoter;	GO:0005730:nucleolus;	GO:0043565:sequence-specific DNA binding;GO:0003700:sequence-specific DNA binding transcription factor activity;GO:0071837:HMG box domain binding;GO:0003682:chromatin binding;	K09322	-
ENSMUSG00000001494	2066	0	0	0	0	0	0	0	0	2	0.06	0	0	11	101853284	101857841	-	Sost	sclerostin [Source:MGI Symbol%3BAcc:MGI:1921749]	GO:0030514:negative regulation of BMP signaling pathway;GO:0090090:negative regulation of canonical Wnt signaling pathway;GO:0071374:cellular response to parathyroid hormone stimulus;GO:0001503:ossification;GO:2000054:negative regulation of Wnt signaling pathway involved in dorsal/ventral axis specification;GO:0031333:negative regulation of protein complex assembly;GO:0045893:positive regulation …	GO:0005615:extracellular space;GO:0005794:Golgi apparatus;GO:0005578:proteinaceous extracellular matrix;	GO:0008201:heparin binding;GO:0008134:transcription factor binding;	K16834	;ko04310 Wnt signaling pathway;ko04928 Parathyroid hormone synthesis, secretion and action;
ENSMUSG00000001496	2842	0	0	0	0	0	0	0	0	0	0	0	0	12	56578743	56583693	-	Nkx2-1	NK2 homeobox 1 [Source:MGI Symbol%3BAcc:MGI:108067]	GO:0021892:cerebral cortex GABAergic interneuron differentiation;GO:0021766:hippocampus development;GO:0030878:thyroid gland development;GO:0046545:development of primary female sexual characteristics;GO:0021759:globus pallidus development;GO:0030512:negative regulation of transforming growth factor beta receptor signaling pathway;GO:0007631:feeding behavior;GO:0060441:epithelial tube branching i…	GO:0005667:transcription factor complex;	GO:0008134:transcription factor binding;GO:0003705:RNA polymerase II distal enhancer sequence-specific DNA binding transcription factor activity;GO:0044212:transcription regulatory region DNA binding;GO:0043565:sequence-specific DNA binding;	K09342	-
ENSMUSG00000001497	5056	0	0	0	0	0	0	0	0	0	0	0	0	12	56738552	56759607	+	Pax9	paired box 9 [Source:MGI Symbol%3BAcc:MGI:97493]	GO:0071363:cellular response to growth factor stimulus;GO:0045944:positive regulation of transcription from RNA polymerase II promoter;GO:0060325:face morphogenesis;GO:0007492:endoderm development;GO:0042481:regulation of odontogenesis;GO:0045892:negative regulation of transcription, DNA-templated;	GO:0005667:transcription factor complex;	GO:0003677:DNA binding;GO:0005515:protein binding;GO:0003700:sequence-specific DNA binding transcription factor activity;	K09382	-
ENSMUSG00000001504	3282	1185	25.43	945	23.89	1520	26.03	1026	22.73	1231	22.24	1198	24.11	13	72776939	72782317	+	Irx2	Iroquois homeobox 2 [Source:MGI Symbol%3BAcc:MGI:1197526]	GO:0006355:regulation of transcription, DNA-templated;	GO:0005634:nucleus;	GO:0003677:DNA binding;GO:0003700:sequence-specific DNA binding transcription factor activity;GO:0043565:sequence-specific DNA binding;	-	-
ENSMUSG00000001506	6563	0	0	16	0.2	103	0.88	0	0	0	0	0	0	11	94827050	94843868	+	Col1a1	collagen%2C type I%2C alpha 1 [Source:MGI Symbol%3BAcc:MGI:88467]	GO:0010812:negative regulation of cell-substrate adhesion;GO:0007601:visual perception;GO:0070208:protein heterotrimerization;GO:0001957:intramembranous ossification;GO:0071230:cellular response to amino acid stimulus;GO:0034505:tooth mineralization;GO:0015031:protein transport;GO:0030199:collagen fibril organization;GO:0007605:sensory perception of sound;GO:0001958:endochondral ossification;GO:0…	GO:0005615:extracellular space;GO:0005584:collagen type I trimer;GO:0005737:cytoplasm;	GO:0046872:metal ion binding;GO:0048407:platelet-derived growth factor binding;GO:0005201:extracellular matrix structural constituent;GO:0042802:identical protein binding;	K06236	;ko04151 PI3K-Akt signaling pathway;ko04510 Focal adhesion;ko04512 ECM-receptor interaction;ko04611 Platelet activation;ko04926 Relaxin signaling pathway;ko04933 AGE-RAGE signaling pathway in diabetic complications;ko04974 Protein digestion and absorption;ko05146 Amoebiasis;ko05165 Human papillomavirus infection;ko05205 Proteoglycans in cancer;
ENSMUSG00000001507	5710	0	0	0	0	1	0.01	0	0	0	0	0	0	11	94935300	94967627	-	Itga3	integrin alpha 3 [Source:MGI Symbol%3BAcc:MGI:96602]	GO:0001764:neuron migration;GO:0007613:memory;GO:0007229:integrin-mediated signaling pathway;GO:0007155:cell adhesion;GO:0007342:fusion of sperm to egg plasma membrane;GO:0034698:response to gonadotropin;GO:0060135:maternal process involved in female pregnancy;GO:0010628:positive regulation of gene expression;GO:0007507:heart development;GO:0042493:response to drug;GO:0010976:positive regulation …	GO:0008305:integrin complex;GO:0045202:synapse;GO:0009986:cell surface;GO:0016323:basolateral plasma membrane;GO:0034667:integrin alpha3-beta1 complex;GO:0030426:growth cone;GO:0048471:perinuclear region of cytoplasm;	GO:0046872:metal ion binding;GO:0005515:protein binding;GO:0005178:integrin binding;GO:0043236:laminin binding;GO:0046982:protein heterodimerization activity;GO:0019904:protein domain specific binding;GO:0001968:fibronectin binding;GO:0005518:collagen binding;	K06482	;ko04151 PI3K-Akt signaling pathway;ko04510 Focal adhesion;ko04512 ECM-receptor interaction;ko04640 Hematopoietic cell lineage;ko04810 Regulation of actin cytoskeleton;ko05165 Human papillomavirus infection;ko05200 Pathways in cancer;ko05222 Small cell lung cancer;ko05410 Hypertrophic cardiomyopathy;ko05412 Arrhythmogenic right ventricular cardiomyopathy;ko05414 Dilated cardiomyopathy;
ENSMUSG00000001508	1735	0	0	1	0.05	0	0	0	0	0	0	0	0	11	94853617	94867153	-	Sgca	sarcoglycan%2C alpha (dystrophin-associated glycoprotein) [Source:MGI Symbol%3BAcc:MGI:894698]	-	GO:0005737:cytoplasm;GO:0005911:cell-cell junction;GO:0005856:cytoskeleton;GO:0005887:integral component of plasma membrane;GO:0042383:sarcolemma;GO:0016012:sarcoglycan complex;GO:0045121:membrane raft;	GO:0005509:calcium ion binding;	K12565	;ko05410 Hypertrophic cardiomyopathy;ko05412 Arrhythmogenic right ventricular cardiomyopathy;ko05414 Dilated cardiomyopathy;ko05416 Viral myocarditis;
ENSMUSG00000001510	2607	0	0	0	0	0	0	0	0	0	0	0	0	11	95010945	95016122	+	Dlx3	distal-less homeobox 3 [Source:MGI Symbol%3BAcc:MGI:94903]	GO:0042475:odontogenesis of dentin-containing tooth;GO:0071895:odontoblast differentiation;GO:0006355:regulation of transcription, DNA-templated;GO:0001890:placenta development;GO:0001568:blood vessel development;	GO:0005634:nucleus;	GO:0001077:RNA polymerase II core promoter proximal region sequence-specific DNA binding transcription factor activity involved in positive regulation of transcription;GO:0003682:chromatin binding;GO:0000976:transcription regulatory region sequence-specific DNA binding;	K09315	-
ENSMUSG00000001517	5754	2336	28.59	2003	28.89	2744	26.81	2123	26.83	2705	27.88	2267	26.02	6	128339930	128353109	+	Foxm1	forkhead box M1 [Source:MGI Symbol%3BAcc:MGI:1347487]	GO:0009888:tissue development;GO:0000122:negative regulation of transcription from RNA polymerase II promoter;GO:2000781:positive regulation of double-strand break repair;GO:0046578:regulation of Ras protein signal transduction;GO:0071156:regulation of cell cycle arrest;GO:0007389:pattern specification process;GO:2000377:regulation of reactive oxygen species metabolic process;GO:0032873:negative …	GO:0005667:transcription factor complex;	GO:0019901:protein kinase binding;GO:0044212:transcription regulatory region DNA binding;GO:0019904:protein domain specific binding;GO:0003705:RNA polymerase II distal enhancer sequence-specific DNA binding transcription factor activity;GO:0043565:sequence-specific DNA binding;GO:0003690:double-stranded DNA binding;GO:0008134:transcription factor binding;GO:0008301:DNA binding, bending;	K09406	;ko04218 Cellular senescence;
ENSMUSG00000001518	7096	287	2.85	285	3.33	351	2.78	245	2.51	293	2.45	286	2.66	6	128386407	128401894	-	Itfg2	integrin alpha FG-GAP repeat containing 2 [Source:MGI Symbol%3BAcc:MGI:1915450]	-	-	-	-	-
ENSMUSG00000001520	3757	12	0.22	9	0.2	16	0.24	11	0.21	11	0.17	9	0.16	6	128376259	128393390	+	Nrip2	nuclear receptor interacting protein 2 [Source:MGI Symbol%3BAcc:MGI:1891884]	GO:0006508:proteolysis;GO:0000122:negative regulation of transcription from RNA polymerase II promoter;	GO:0005634:nucleus;	GO:0005515:protein binding;GO:0004190:aspartic-type endopeptidase activity;	K13215	-
ENSMUSG00000001521	9342	473	3.57	396	3.52	583	3.51	519	4.04	706	4.48	573	4.05	6	128298124	128332814	-	Tulp3	tubby-like protein 3 [Source:MGI Symbol%3BAcc:MGI:1329045]	GO:0008277:regulation of G-protein coupled receptor protein signaling pathway;GO:0031076:embryonic camera-type eye development;GO:0007420:brain development;GO:0060831:smoothened signaling pathway involved in dorsal/ventral neural tube patterning;GO:0021914:negative regulation of smoothened signaling pathway involved in ventral spinal cord patterning;GO:0060434:bronchus morphogenesis;GO:0021953:ce…	GO:0072372:primary cilium;GO:0005576:extracellular region;GO:0005634:nucleus;GO:0005886:plasma membrane;	GO:0035091:phosphatidylinositol binding;	-	-
ENSMUSG00000001524	3313	403	8.57	335	8.39	591	10.03	386	8.47	463	8.29	446	8.89	17	35978622	35984631	-	Gtf2h4	general transcription factor II H%2C polypeptide 4 [Source:MGI Symbol%3BAcc:MGI:1338799]	GO:0006289:nucleotide-excision repair;GO:0006468:protein phosphorylation;GO:0006355:regulation of transcription, DNA-templated;GO:0006366:transcription from RNA polymerase II promoter;GO:0006367:transcription initiation from RNA polymerase II promoter;GO:0000718:nucleotide-excision repair, DNA damage removal;GO:0006370:7-methylguanosine mRNA capping;GO:0006362:transcription elongation from RNA po…	GO:0005675:holo TFIIH complex;GO:0000439:core TFIIH complex;	GO:0004003:ATP-dependent DNA helicase activity;GO:0008353:RNA polymerase II carboxy-terminal domain kinase activity;GO:0005515:protein binding;GO:0003700:sequence-specific DNA binding transcription factor activity;	K03144	;ko03022 Basal transcription factors;ko03420 Nucleotide excision repair;ko05203 Viral carcinogenesis;
ENSMUSG00000001525	3327	24460	517.83	21150	527.55	32388	547.2	22789	498.08	27868	496.75	25111	498.56	17	36144813	36149198	-	Tubb5	tubulin%2C beta 5 class I [Source:MGI Symbol%3BAcc:MGI:107812]	GO:0051225:spindle assembly;GO:0051258:protein polymerization;	GO:0045298:tubulin complex;GO:0044297:cell body;GO:0005641:nuclear envelope lumen;GO:0005737:cytoplasm;GO:0005874:microtubule;GO:0070062:extracellular exosome;	GO:0032794:GTPase activating protein binding;GO:0005525:GTP binding;GO:0042288:MHC class I protein binding;GO:0019904:protein domain specific binding;GO:0032403:protein complex binding;GO:0003924:GTPase activity;GO:0005200:structural constituent of cytoskeleton;	K07375	;ko04145 Phagosome;ko04540 Gap junction;ko05010 Alzheimer disease;ko05012 Parkinson disease;ko05014 Amyotrophic lateral sclerosis;ko05016 Huntington disease;ko05020 Prion disease;ko05022 Pathways of neurodegeneration - multiple diseases;ko05130 Pathogenic Escherichia coli infection;ko05132 Salmonella infection;
ENSMUSG00000001542	9828	1023	7.33	858	7.24	1229	7.03	964	7.13	1252	7.55	1130	7.59	13	75854876	75920483	+	Ell2	elongation factor for RNA polymerase II 2 [Source:MGI Symbol%3BAcc:MGI:2183438]	GO:0032968:positive regulation of transcription elongation from RNA polymerase II promoter;	GO:0008023:transcription elongation factor complex;	-	K15183	-
ENSMUSG00000001552	6436	3	0.03	0	0	0	0	1	0.01	0	0	1	0.01	11	100259784	100288589	-	Jup	junction plakoglobin [Source:MGI Symbol%3BAcc:MGI:96650]	-	-	-	K10056	;ko05200 Pathways in cancer;ko05202 Transcriptional misregulation in cancer;ko05221 Acute myeloid leukemia;ko05226 Gastric cancer;ko05412 Arrhythmogenic right ventricular cardiomyopathy;
ENSMUSG00000001555	2935	1	0.02	1	0.03	9	0.17	0	0	0	0	1	0.02	11	100306523	100315650	+	Fkbp10	FK506 binding protein 10 [Source:MGI Symbol%3BAcc:MGI:104769]	GO:0006457:protein folding;GO:0000413:protein peptidyl-prolyl isomerization;GO:0018208:peptidyl-proline modification;	GO:0016020:membrane;GO:0005783:endoplasmic reticulum;GO:0005788:endoplasmic reticulum lumen;	GO:0005528:FK506 binding;GO:0005515:protein binding;GO:0005509:calcium ion binding;GO:0003755:peptidyl-prolyl cis-trans isomerase activity;	K09575	-
ENSMUSG00000001558	2161	1	0.03	0	0	0	0	1	0.03	5	0.14	3	0.09	11	100332743	100347848	+	Klhl10	kelch-like 10 [Source:MGI Symbol%3BAcc:MGI:2181067]	GO:0048808:male genitalia morphogenesis;GO:0000902:cell morphogenesis;GO:0048873:homeostasis of number of cells within a tissue;GO:0008584:male gonad development;GO:0007286:spermatid development;GO:0009566:fertilization;	GO:0005737:cytoplasm;	GO:0005515:protein binding;	K10448	-
ENSMUSG00000001566	2250	0	0	0	0	0	0	0	0	0	0	0	0	5	29678032	29683468	-	Mnx1	motor neuron and pancreas homeobox 1 [Source:MGI Symbol%3BAcc:MGI:109160]	GO:0060539:diaphragm development;GO:0001764:neuron migration;GO:0031018:endocrine pancreas development;GO:0021675:nerve development;GO:0008045:motor neuron axon guidance;GO:0009791:post-embryonic development;GO:0021904:dorsal/ventral neural tube patterning;GO:0021520:spinal cord motor neuron cell fate specification;	GO:0005634:nucleus;	-	K08025	;ko04950 Maturity onset diabetes of the young;
ENSMUSG00000001569	9232	1167	8.9	987	8.87	1407	8.57	1124	8.85	1372	8.81	1310	9.37	5	29639662	29662841	+	Nom1	nucleolar protein with MIF4G domain 1 [Source:MGI Symbol%3BAcc:MGI:1861749]	GO:0016070:RNA metabolic process;	GO:0005730:nucleolus;	GO:0003677:DNA binding;GO:0003723:RNA binding;	K17583	-
ENSMUSG00000001576	8888	1661	13.16	1419	13.25	2239	14.16	1559	12.75	1866	12.45	1760	13.08	17	26780463	26875908	+	Ergic1	endoplasmic reticulum-golgi intermediate compartment (ERGIC) 1 [Source:MGI Symbol%3BAcc:MGI:1914708]	GO:0006888:ER to Golgi vesicle-mediated transport;	GO:0016021:integral component of membrane;GO:0005783:endoplasmic reticulum;GO:0005793:endoplasmic reticulum-Golgi intermediate compartment;GO:0005794:Golgi apparatus;	-	-	-
ENSMUSG00000001583	3329	1	0.02	0	0	2	0.03	2	0.04	0	0	0	0	11	69741831	69749556	-	Tnk1	tyrosine kinase%2C non-receptor%2C 1 [Source:MGI Symbol%3BAcc:MGI:1930958]	GO:0046777:protein autophosphorylation;GO:0030308:negative regulation of cell growth;GO:0046580:negative regulation of Ras protein signal transduction;	GO:0005829:cytosol;GO:0016020:membrane;	GO:0005524:ATP binding;GO:0004715:non-membrane spanning protein tyrosine kinase activity;	K08885	-
ENSMUSG00000001588	4878	10	0.14	13	0.22	25	0.29	14	0.21	20	0.24	16	0.22	11	69772393	69786365	-	Acap1	ArfGAP with coiled-coil%2C ankyrin repeat and PH domains 1 [Source:MGI Symbol%3BAcc:MGI:2388270]	GO:0016042:lipid catabolic process;	-	GO:0008270:zinc ion binding;GO:0004871:signal transducer activity;GO:0005543:phospholipid binding;GO:0016787:hydrolase activity;	K12489	;ko04144 Endocytosis;
ENSMUSG00000001604	1400	0	0	0	0	0	0	0	0	0	0	0	0	4	135975040	136002209	+	Tcea3	transcription elongation factor A (SII)%2C 3 [Source:MGI Symbol%3BAcc:MGI:1196908]	GO:0006357:regulation of transcription from RNA polymerase II promoter;GO:0006414:translational elongation;GO:0032784:regulation of DNA-templated transcription, elongation;GO:0006355:regulation of transcription, DNA-templated;	GO:0005634:nucleus;	GO:0003746:translation elongation factor activity;GO:0008270:zinc ion binding;GO:0003677:DNA binding;GO:0003676:nucleic acid binding;	-	-
ENSMUSG00000001622	4152	206	3.49	177	3.54	216	2.92	160	2.8	219	3.13	177	2.82	5	88073438	88080524	+	Csn3	casein kappa [Source:MGI Symbol%3BAcc:MGI:107461]	GO:0001701:in utero embryonic development;GO:0007595:lactation;GO:0010388:cullin deneddylation;	GO:0005737:cytoplasm;GO:0005576:extracellular region;GO:0008180:COP9 signalosome;	GO:0005515:protein binding;	K17282	-
ENSMUSG00000001627	5858	1192	14.33	1135	16.08	1704	16.35	1361	16.89	1749	17.71	1575	17.76	12	40251566	40298503	-	Ifrd1	interferon-related developmental regulator 1 [Source:MGI Symbol%3BAcc:MGI:1316717]	GO:0042692:muscle cell differentiation;GO:0007405:neuroblast proliferation;GO:0014009:glial cell proliferation;GO:0007527:adult somatic muscle development;GO:0007275:multicellular organismal development;	GO:0005737:cytoplasm;GO:0005886:plasma membrane;GO:0005634:nucleus;	-	-	-
ENSMUSG00000001630	4880	917	13.24	730	12.41	1101	12.68	724	10.79	906	11.01	824	11.15	6	146626493	146680310	+	Stk38l	serine/threonine kinase 38 like [Source:MGI Symbol%3BAcc:MGI:1922250]	-	-	-	K08790	-
ENSMUSG00000001632	6779	1399	14.54	1222	14.96	1690	14.01	1407	15.09	1745	15.27	1556	15.16	6	113284098	113301821	+	Brpf1	bromodomain and PHD finger containing%2C 1 [Source:MGI Symbol%3BAcc:MGI:1926033]	GO:0043966:histone H3 acetylation;GO:0045893:positive regulation of transcription, DNA-templated;	GO:0070776:MOZ/MORF histone acetyltransferase complex;GO:0005737:cytoplasm;GO:0005886:plasma membrane;	GO:0008270:zinc ion binding;GO:0046872:metal ion binding;	K11348	-
ENSMUSG00000001642	8384	8405	70.61	6525	64.59	11838	79.37	6390	55.42	5871	41.53	6446	50.79	6	34279369	34294413	-	Akr1b3	aldo-keto reductase family 1%2C member B3 (aldose reductase) [Source:MGI Symbol%3BAcc:MGI:1353494]	GO:0044597:daunorubicin metabolic process;GO:0055114:oxidation-reduction process;GO:0046427:positive regulation of JAK-STAT cascade;GO:0006061:sorbitol biosynthetic process;GO:0044598:doxorubicin metabolic process;GO:0031098:stress-activated protein kinase signaling cascade;GO:0048661:positive regulation of smooth muscle cell proliferation;GO:0010033:response to organic substance;	GO:0005730:nucleolus;GO:0005615:extracellular space;GO:0005737:cytoplasm;	GO:0004032:alditol:NADP+ 1-oxidoreductase activity;GO:0043795:glyceraldehyde oxidoreductase activity;	K00011	;ko00040 Pentose and glucuronate interconversions;ko00051 Fructose and mannose metabolism;ko00052 Galactose metabolism;ko00561 Glycerolipid metabolism;ko00790 Folate biosynthesis;ko01100 Metabolic pathways;
ENSMUSG00000001655	2461	0	0	0	0	0	0	0	0	0	0	0	0	15	102829538	102837249	+	Hoxc13	homeobox C13 [Source:MGI Symbol%3BAcc:MGI:99560]	GO:0045944:positive regulation of transcription from RNA polymerase II promoter;GO:0009952:anterior/posterior pattern specification;GO:0035878:nail development;GO:0001942:hair follicle development;GO:0043587:tongue morphogenesis;	GO:0005634:nucleus;	GO:0001077:RNA polymerase II core promoter proximal region sequence-specific DNA binding transcription factor activity involved in positive regulation of transcription;GO:0003677:DNA binding;GO:0003682:chromatin binding;	K09298	-
ENSMUSG00000001656	2021	0	0	0	0	0	0	0	0	0	0	0	0	15	102862862	102866143	+	Hoxc11	homeobox C11 [Source:MGI Symbol%3BAcc:MGI:96193]	GO:0009954:proximal/distal pattern formation;GO:0060272:embryonic skeletal joint morphogenesis;GO:0001759:organ induction;GO:0009952:anterior/posterior pattern specification;GO:0006355:regulation of transcription, DNA-templated;GO:0001656:metanephros development;GO:0042733:embryonic digit morphogenesis;	GO:0005634:nucleus;	GO:0043565:sequence-specific DNA binding;GO:0003700:sequence-specific DNA binding transcription factor activity;	K09296	-
ENSMUSG00000001657	2832	0	0	0	0	0	0	0	0	0	0	0	0	15	102899039	102902543	+	Hoxc8	homeobox C8 [Source:MGI Symbol%3BAcc:MGI:96198]	GO:0048705:skeletal system morphogenesis;GO:0009952:anterior/posterior pattern specification;GO:0000122:negative regulation of transcription from RNA polymerase II promoter;GO:0030182:neuron differentiation;	GO:0005634:nucleus;	GO:0003700:sequence-specific DNA binding transcription factor activity;GO:0000976:transcription regulatory region sequence-specific DNA binding;	K09308	-
ENSMUSG00000001661	2408	26	0.76	25	0.86	29	0.68	21	0.63	32	0.79	35	0.96	15	102906689	102920313	+	Hoxc6	homeobox C6 [Source:MGI Symbol%3BAcc:MGI:96197]	GO:0006357:regulation of transcription from RNA polymerase II promoter;GO:0009952:anterior/posterior pattern specification;GO:0048706:embryonic skeletal system development;	GO:0005634:nucleus;	GO:0043565:sequence-specific DNA binding;GO:0003714:transcription corepressor activity;GO:0003700:sequence-specific DNA binding transcription factor activity;	K09306	-
ENSMUSG00000001663	1528	3	0.14	0	0	4	0.15	4	0.19	2	0.08	1	0.04	10	75619647	75634418	-	Gstt1	glutathione S-transferase%2C theta 1 [Source:MGI Symbol%3BAcc:MGI:107379]	GO:0006749:glutathione metabolic process;GO:0055114:oxidation-reduction process;	GO:0005634:nucleus;GO:0005829:cytosol;	GO:0004364:glutathione transferase activity;GO:0004602:glutathione peroxidase activity;	K00799	;ko00480 Glutathione metabolism;ko00980 Metabolism of xenobiotics by cytochrome P450;ko00982 Drug metabolism - cytochrome P450;ko00983 Drug metabolism - other enzymes;ko01100 Metabolic pathways;ko01524 Platinum drug resistance;ko04212 Longevity regulating pathway - worm;ko05200 Pathways in cancer;ko05204 Chemical carcinogenesis;ko05225 Hepatocellular carcinoma;ko05418 Fluid shear stress and ather…
ENSMUSG00000001665	3842	37	0.68	32	0.69	49	0.72	36	0.68	50	0.77	28	0.48	10	75609949	75617248	-	Gstt3	glutathione S-transferase%2C theta 3 [Source:MGI Symbol%3BAcc:MGI:2143526]	GO:0006749:glutathione metabolic process;	-	GO:0004364:glutathione transferase activity;	K00799	;ko00480 Glutathione metabolism;ko00980 Metabolism of xenobiotics by cytochrome P450;ko00982 Drug metabolism - cytochrome P450;ko00983 Drug metabolism - other enzymes;ko01100 Metabolic pathways;ko01524 Platinum drug resistance;ko04212 Longevity regulating pathway - worm;ko05200 Pathways in cancer;ko05204 Chemical carcinogenesis;ko05225 Hepatocellular carcinoma;ko05418 Fluid shear stress and ather…
ENSMUSG00000001666	773	149	13.58	140	15.03	263	19.12	174	16.37	267	20.48	209	17.86	10	75607064	75609248	-	Ddt	D-dopachrome tautomerase [Source:MGI Symbol%3BAcc:MGI:1298381]	GO:0006954:inflammatory response;GO:0042438:melanin biosynthetic process;	GO:0005737:cytoplasm;	GO:0004167:dopachrome isomerase activity;GO:0033981:D-dopachrome decarboxylase activity;	K10028	-
ENSMUSG00000001670	2405	0	0	0	0	0	0	0	0	0	0	0	0	8	110717069	110726435	+	Tat	tyrosine aminotransferase [Source:MGI Symbol%3BAcc:MGI:98487]	GO:0046689:response to mercury ion;GO:0006979:response to oxidative stress;GO:0006103:2-oxoglutarate metabolic process;GO:0006559:L-phenylalanine catabolic process;GO:0051384:response to glucocorticoid;GO:0006572:tyrosine catabolic process;GO:0006536:glutamate metabolic process;GO:0006094:gluconeogenesis;	GO:0005739:mitochondrion;	GO:0080130:L-phenylalanine:2-oxoglutarate aminotransferase activity;GO:0016597:amino acid binding;GO:0004838:L-tyrosine:2-oxoglutarate aminotransferase activity;GO:0030170:pyridoxal phosphate binding;	K00815	;ko00130 Ubiquinone and other terpenoid-quinone biosynthesis;ko00270 Cysteine and methionine metabolism;ko00350 Tyrosine metabolism;ko00360 Phenylalanine metabolism;ko00400 Phenylalanine, tyrosine and tryptophan biosynthesis;ko00401 Novobiocin biosynthesis;ko00950 Isoquinoline alkaloid biosynthesis;ko00960 Tropane, piperidine and pyridine alkaloid biosynthesis;ko01100 Metabolic pathways;ko01110 B…
ENSMUSG00000001672	3284	0	0	0	0	0	0	0	0	0	0	0	0	8	110674546	110688835	-	Marveld3	MARVEL (membrane-associating) domain containing 3 [Source:MGI Symbol%3BAcc:MGI:1920858]	GO:0045216:cell-cell junction organization;	GO:0005923:bicellular tight junction;GO:0016020:membrane;	-	-	-
ENSMUSG00000001674	2483	2272	64.45	2032	67.91	2938	66.51	2108	61.73	2545	60.78	2334	62.09	1	121481564	121495718	-	Ddx18	DEAD box helicase 18 [Source:MGI Symbol%3BAcc:MGI:1914192]	-	GO:0005730:nucleolus;	GO:0008026:ATP-dependent helicase activity;GO:0003723:RNA binding;GO:0005524:ATP binding;	K13179	-
ENSMUSG00000001687	8098	1001	8.71	813	8.33	1317	9.14	880	7.9	1192	8.73	1048	8.55	5	148441445	148489599	-	Ubl3	ubiquitin-like 3 [Source:MGI Symbol%3BAcc:MGI:1344373]	-	GO:0005886:plasma membrane;	-	-	-
ENSMUSG00000001700	5679	0	0	0	0	1	0.01	0	0	0	0	0	0	18	56533409	56636864	+	Gramd3	GRAM domain containing 3 [Source:MGI Symbol%3BAcc:MGI:1914815]	-	GO:0005881:cytoplasmic microtubule;	-	-	-
ENSMUSG00000001707	3257	1475	31.9	1240	31.59	2015	34.78	1479	33.02	1778	32.37	1807	36.65	13	38828183	38843034	-	Eef1e1	eukaryotic translation elongation factor 1 epsilon 1 [Source:MGI Symbol%3BAcc:MGI:1913393]	GO:0006281:DNA repair;GO:0043517:positive regulation of DNA damage response, signal transduction by p53 class mediator;GO:0006414:translational elongation;GO:0043065:positive regulation of apoptotic process;GO:0008285:negative regulation of cell proliferation;GO:0009790:embryo development;	GO:0017101:aminoacyl-tRNA synthetase multienzyme complex;GO:0005730:nucleolus;GO:0005737:cytoplasm;	GO:0003746:translation elongation factor activity;GO:0005515:protein binding;	K15439	-
ENSMUSG00000001729	4098	5452	93.71	4618	93.52	7193	98.66	5180	91.91	6105	88.35	5590	90.1	12	112620255	112641318	-	Akt1	thymoma viral proto-oncogene 1 [Source:MGI Symbol%3BAcc:MGI:87986]	GO:0000060:protein import into nucleus, translocation;GO:0070141:response to UV-A;GO:0051146:striated muscle cell differentiation;GO:0060716:labyrinthine layer blood vessel development;GO:0071364:cellular response to epidermal growth factor stimulus;GO:0032094:response to food;GO:0031659:positive regulation of cyclin-dependent protein serine/threonine kinase activity involved in G1/S transition o…	GO:0005819:spindle;GO:0005886:plasma membrane;GO:0005634:nucleus;GO:0005829:cytosol;GO:0030027:lamellipodium;	GO:0030235:nitric-oxide synthase regulator activity;GO:0005080:protein kinase C binding;GO:0042802:identical protein binding;GO:0004674:protein serine/threonine kinase activity;GO:0005524:ATP binding;GO:0005547:phosphatidylinositol-3,4,5-trisphosphate binding;GO:0043325:phosphatidylinositol-3,4-bisphosphate binding;	K04456	;ko01521 EGFR tyrosine kinase inhibitor resistance;ko01522 Endocrine resistance;ko01524 Platinum drug resistance;ko04010 MAPK signaling pathway;ko04012 ErbB signaling pathway;ko04014 Ras signaling pathway;ko04015 Rap1 signaling pathway;ko04022 cGMP-PKG signaling pathway;ko04024 cAMP signaling pathway;ko04062 Chemokine signaling pathway;ko04066 HIF-1 signaling pathway;ko04068 FoxO signaling pathwa…
ENSMUSG00000001739	2124	4	0.13	3	0.12	8	0.21	3	0.1	1	0.03	5	0.16	5	136995470	137004712	+	Cldn15	claudin 15 [Source:MGI Symbol%3BAcc:MGI:1913103]	-	GO:0005923:bicellular tight junction;GO:0005886:plasma membrane;GO:0016021:integral component of membrane;	GO:0005198:structural molecule activity;	K06087	;ko04514 Cell adhesion molecules;ko04530 Tight junction;ko04670 Leukocyte transendothelial migration;ko05130 Pathogenic Escherichia coli infection;ko05160 Hepatitis C;
ENSMUSG00000001741	7865	364	3.26	280	2.95	431	3.08	340	3.14	398	3	370	3.11	7	83292033	83394934	-	Il16	interleukin 16 [Source:MGI Symbol%3BAcc:MGI:1270855]	GO:0006355:regulation of transcription, DNA-templated;GO:0050930:induction of positive chemotaxis;GO:0030595:leukocyte chemotaxis;	GO:0005615:extracellular space;GO:0005737:cytoplasm;GO:0005634:nucleus;	GO:0005125:cytokine activity;	-	-
ENSMUSG00000001750	4603	2521	38.58	2034	36.67	3134	38.27	3948	62.37	4750	61.2	4192	60.16	19	3946050	3957133	-	Tcirg1	T cell%2C immune regulator 1%2C ATPase%2C H+ transporting%2C lysosomal V0 protein A3 [Source:MGI Symbol%3BAcc:MGI:1350931]	-	GO:0016324:apical plasma membrane;GO:0005739:mitochondrion;	-	K02154	;ko00190 Oxidative phosphorylation;ko01100 Metabolic pathways;ko04142 Lysosome;ko04145 Phagosome;ko04721 Synaptic vesicle cycle;ko04966 Collecting duct acid secretion;ko05110 Vibrio cholerae infection;ko05120 Epithelial cell signaling in Helicobacter pylori infection;ko05152 Tuberculosis;ko05165 Human papillomavirus infection;ko05323 Rheumatoid arthritis;
ENSMUSG00000001751	2658	448	11.87	411	12.83	619	13.09	687	18.79	895	19.97	798	19.83	11	100960838	100968498	+	Naglu	alpha-N-acetylglucosaminidase (Sanfilippo disease IIIB) [Source:MGI Symbol%3BAcc:MGI:1351641]	GO:0021680:cerebellar Purkinje cell layer development;GO:0060119:inner ear receptor cell development;GO:0046548:retinal rod cell development;GO:0007040:lysosome organization;GO:0008152:metabolic process;GO:0045475:locomotor rhythm;GO:0042474:middle ear morphogenesis;	-	GO:0004561:alpha-N-acetylglucosaminidase activity;	K01205	;ko00531 Glycosaminoglycan degradation;ko01100 Metabolic pathways;ko04142 Lysosome;
ENSMUSG00000001755	2867	494	12.14	517	14.96	766	15.02	582	14.76	664	13.73	632	14.56	11	100973391	100977445	+	Coasy	Coenzyme A synthase [Source:MGI Symbol%3BAcc:MGI:1918993]	GO:0015937:coenzyme A biosynthetic process;GO:0016310:phosphorylation;	GO:0005730:nucleolus;GO:0005737:cytoplasm;	GO:0004140:dephospho-CoA kinase activity;GO:0005524:ATP binding;GO:0004595:pantetheine-phosphate adenylyltransferase activity;	K02318	;ko00770 Pantothenate and CoA biosynthesis;ko01100 Metabolic pathways;ko01240 Biosynthesis of cofactors;
ENSMUSG00000001761	5621	33	0.41	34	0.5	48	0.48	52	0.67	62	0.65	59	0.69	6	29735502	29761364	+	Smo	smoothened%2C frizzled class receptor [Source:MGI Symbol%3BAcc:MGI:108075]	GO:0060644:mammary gland epithelial cell differentiation;GO:0021984:adenohypophysis development;GO:0021938:smoothened signaling pathway involved in regulation of cerebellar granule cell precursor cell proliferation;GO:0060070:canonical Wnt signaling pathway;GO:0060684:epithelial-mesenchymal cell signaling;GO:0048846:axon extension involved in axon guidance;GO:0035264:multicellular organism growth…	GO:0043025:neuronal cell body;GO:0044295:axonal growth cone;GO:0044294:dendritic growth cone;GO:0014069:postsynaptic density;GO:0005794:Golgi apparatus;GO:0072372:primary cilium;GO:0005634:nucleus;GO:0060170:ciliary membrane;GO:0005901:caveola;GO:0016021:integral component of membrane;	GO:0030165:PDZ domain binding;GO:0042813:Wnt-activated receptor activity;GO:0052894:norspermine:oxygen oxidoreductase activity;GO:0052895:N1-acetylspermine:oxygen oxidoreductase (N1-acetylspermidine-forming) activity;GO:0005113:patched binding;GO:0052901:spermine:oxygen oxidoreductase (spermidine-forming) activity;GO:0017147:Wnt-protein binding;GO:0008144:drug binding;GO:0004930:G-protein coupled…	K06226	;ko04340 Hedgehog signaling pathway;ko04341 Hedgehog signaling pathway - fly;ko04360 Axon guidance;ko05200 Pathways in cancer;ko05205 Proteoglycans in cancer;ko05217 Basal cell carcinoma;
ENSMUSG00000001763	5195	0	0	0	0	0	0	1	0.01	2	0.02	1	0.01	6	29694221	29718558	+	Tspan33	tetraspanin 33 [Source:MGI Symbol%3BAcc:MGI:1919012]	-	GO:0016021:integral component of membrane;	-	K17346	-
ENSMUSG00000001767	3844	840	15.39	773	16.69	1062	15.53	863	16.33	1028	15.86	927	15.93	2	145759399	145776934	-	Crnkl1	crooked neck pre-mRNA splicing factor 1 [Source:MGI Symbol%3BAcc:MGI:1914127]	GO:0006396:RNA processing;	GO:0005622:intracellular;	-	K12869	;ko03040 Spliceosome;
ENSMUSG00000001768	11271	1432	8.95	1285	9.46	1905	9.5	1355	8.74	1831	9.63	1573	9.22	2	145517135	145729536	+	Rin2	Ras and Rab interactor 2 [Source:MGI Symbol%3BAcc:MGI:1921280]	GO:0007165:signal transduction;GO:0006897:endocytosis;GO:0007264:small GTPase mediated signal transduction;	GO:0005737:cytoplasm;	GO:0005096:GTPase activator activity;GO:0017112:Rab guanyl-nucleotide exchange factor activity;	-	-
ENSMUSG00000001773	3210	0	0	0	0	0	0	0	0	0	0	0	0	7	86368185	86425151	-	Folh1	folate hydrolase 1 [Source:MGI Symbol%3BAcc:MGI:1858193]	GO:0006760:folic acid-containing compound metabolic process;GO:0006508:proteolysis;	GO:0005737:cytoplasm;GO:0005887:integral component of plasma membrane;GO:0005634:nucleus;	GO:0046872:metal ion binding;GO:0004180:carboxypeptidase activity;GO:0016805:dipeptidase activity;GO:0008237:metallopeptidase activity;	K14592	;ko00250 Alanine, aspartate and glutamate metabolism;ko01100 Metabolic pathways;ko04977 Vitamin digestion and absorption;
ENSMUSG00000001774	7498	2191	20.58	1943	21.5	2770	20.77	2143	20.78	2677	21.17	2471	21.77	9	18203421	18228738	+	Chordc1	cysteine and histidine-rich domain (CHORD)-containing%2C zinc-binding protein 1 [Source:MGI Symbol%3BAcc:MGI:1914167]	GO:2000299:negative regulation of Rho-dependent protein serine/threonine kinase activity;GO:0080134:regulation of response to stress;GO:0010824:regulation of centrosome duplication;GO:0061077:chaperone-mediated protein folding;	-	GO:0008270:zinc ion binding;GO:0005509:calcium ion binding;GO:0051879:Hsp90 protein binding;	K16729	-
ENSMUSG00000001783	2615	2406	64.8	1993	63.25	3167	68.08	2478	68.91	2795	63.39	2667	67.37	10	85774501	85793687	-	Rtcb	RNA 2'%2C3'-cyclic phosphate and 5'-OH ligase [Source:MGI Symbol%3BAcc:MGI:106379]	GO:0001890:placenta development;GO:0001701:in utero embryonic development;GO:0006388:tRNA splicing, via endonucleolytic cleavage and ligation;	GO:0072669:tRNA-splicing ligase complex;GO:0005737:cytoplasm;	GO:0017166:vinculin binding;GO:0003972:RNA ligase (ATP) activity;GO:0046872:metal ion binding;GO:0005524:ATP binding;	K14415	-
ENSMUSG00000001785	2942	1209	28.94	1029	29.03	1544	29.5	1225	30.28	1592	32.09	1407	31.59	10	85665358	85724960	+	Pwp1	PWP1 homolog%2C endonuclein [Source:MGI Symbol%3BAcc:MGI:1914735]	-	GO:0005634:nucleus;	-	K14791	-
ENSMUSG00000001786	6180	317	3.61	250	3.36	412	3.75	261	3.07	344	3.3	315	3.37	10	85857836	85887737	+	Fbxo7	F-box protein 7 [Source:MGI Symbol%3BAcc:MGI:1917004]	GO:0031647:regulation of protein stability;GO:0016567:protein ubiquitination;	GO:0005737:cytoplasm;GO:0005634:nucleus;GO:0043234:protein complex;	-	K10293	-
ENSMUSG00000001794	2477	1834	52.15	1572	52.67	2445	55.48	1870	54.9	2112	50.57	1943	51.82	7	29886361	29898236	-	Capns1	calpain%2C small subunit 1 [Source:MGI Symbol%3BAcc:MGI:88266]	GO:0006508:proteolysis;	GO:0005737:cytoplasm;GO:0005886:plasma membrane;	GO:0046982:protein heterodimerization activity;GO:0004198:calcium-dependent cysteine-type endopeptidase activity;GO:0005509:calcium ion binding;	K08583	;ko05131 Shigellosis;
ENSMUSG00000001802	4700	0	0	0	0	1	0.01	0	0	0	0	0	0	7	34899452	34914923	-	Lrp3	low density lipoprotein receptor-related protein 3 [Source:MGI Symbol%3BAcc:MGI:3584516]	GO:0006897:endocytosis;	GO:0016021:integral component of membrane;GO:0005905:coated pit;	GO:0005515:protein binding;	-	-
ENSMUSG00000001804	3478	0	0	0	0	0	0	0	0	0	0	0	0	18	20569232	20604878	+	Dsg4	desmoglein 4 [Source:MGI Symbol%3BAcc:MGI:2661061]	GO:0007156:homophilic cell adhesion via plasma membrane adhesion molecules;GO:0030216:keratinocyte differentiation;GO:0030509:BMP signaling pathway;GO:0042640:anagen;	GO:0016021:integral component of membrane;GO:0030057:desmosome;GO:0005886:plasma membrane;	GO:0005509:calcium ion binding;	K07599	-
ENSMUSG00000001815	4191	0	0	0	0	0	0	0	0	0	0	0	0	2	74483335	74489901	-	Evx2	even-skipped homeobox 2 [Source:MGI Symbol%3BAcc:MGI:95462]	-	-	-	K09320	-
ENSMUSG00000001819	2483	0	0	0	0	0	0	0	0	0	0	0	0	2	74498654	74501943	+	Hoxd13	homeobox D13 [Source:MGI Symbol%3BAcc:MGI:96205]	GO:0001501:skeletal system development;GO:0042733:embryonic digit morphogenesis;GO:0042127:regulation of cell proliferation;GO:0060602:branch elongation of an epithelium;GO:0048619:embryonic hindgut morphogenesis;GO:0060527:prostate epithelial cord arborization involved in prostate glandular acinus morphogenesis;GO:0060571:morphogenesis of an epithelial fold;GO:0009952:anterior/posterior pattern …	GO:0005634:nucleus;	GO:0043565:sequence-specific DNA binding;GO:0003700:sequence-specific DNA binding transcription factor activity;GO:0003682:chromatin binding;	K09298	-
ENSMUSG00000001823	2534	0	0	0	0	0	0	0	0	0	0	0	0	2	74505357	74508049	+	Hoxd12	homeobox D12 [Source:MGI Symbol%3BAcc:MGI:96204]	GO:0006355:regulation of transcription, DNA-templated;GO:0001501:skeletal system development;GO:0042733:embryonic digit morphogenesis;GO:0007389:pattern specification process;	GO:0005667:transcription factor complex;	GO:0043565:sequence-specific DNA binding;GO:0005515:protein binding;GO:0003700:sequence-specific DNA binding transcription factor activity;	K09297	-
ENSMUSG00000001827	2297	1	0.03	3	0.11	2	0.05	1	0.03	2	0.05	1	0.03	7	101507538	101519995	-	Folr1	folate receptor 1 (adult) [Source:MGI Symbol%3BAcc:MGI:95568]	GO:0055085:transmembrane transport;GO:0046655:folic acid metabolic process;GO:0015884:folic acid transport;GO:0006620:posttranslational protein targeting to membrane;	GO:0005903:brush border;GO:0046658:anchored component of plasma membrane;	GO:0008517:folic acid transporter activity;GO:0005542:folic acid binding;GO:0004872:receptor activity;	K13649	;ko01523 Antifolate resistance;ko04144 Endocytosis;
ENSMUSG00000001829	9960	1066	7.54	979	8.16	1520	8.58	1121	8.18	1204	7.17	1174	7.79	7	101312840	101444713	+	Clpb	ClpB caseinolytic peptidase B [Source:MGI Symbol%3BAcc:MGI:1100517]	GO:0034605:cellular response to heat;	GO:0005739:mitochondrion;	GO:0005524:ATP binding;GO:0017111:nucleoside-triphosphatase activity;	K03695	;ko04213 Longevity regulating pathway - multiple species;
ENSMUSG00000001833	11631	3869	23.43	3383	24.14	4869	23.53	3780	23.63	4477	22.83	4196	23.83	9	25163735	25219867	+	Septin7	septin 7 [Source:MGI Symbol%3BAcc:MGI:1335094]	GO:0051291:protein heterooligomerization;GO:0060271:cilium morphogenesis;GO:0051301:cell division;GO:0007067:mitotic nuclear division;GO:0016476:regulation of embryonic cell shape;	GO:0043679:axon terminus;GO:0000777:condensed chromosome kinetochore;GO:0005730:nucleolus;GO:0005819:spindle;GO:0032154:cleavage furrow;GO:0030496:midbody;GO:0001725:stress fiber;GO:0031105:septin complex;GO:0045202:synapse;GO:0016324:apical plasma membrane;	GO:0005525:GTP binding;	K16944	;ko05131 Shigellosis;
ENSMUSG00000001844	2864	238	5.85	204	5.91	317	6.22	206	5.23	273	5.65	258	5.95	5	143302244	143315011	-	Zdhhc4	zinc finger%2C DHHC domain containing 4 [Source:MGI Symbol%3BAcc:MGI:1920131]	-	GO:0016021:integral component of membrane;	GO:0008270:zinc ion binding;GO:0016746:transferase activity, transferring acyl groups;	K18932	-
ENSMUSG00000001847	4496	4457	69.82	3920	72.36	5785	72.33	3857	62.38	4726	62.34	4247	62.4	5	143489389	143513791	-	Rac1	Rac family small GTPase 1 [Source:MGI Symbol%3BAcc:MGI:97845]	GO:0048011:neurotrophin TRK receptor signaling pathway;GO:0006954:inflammatory response;GO:0016032:viral process;GO:0030334:regulation of cell migration;GO:0030838:positive regulation of actin filament polymerization;GO:0023014:signal transduction by protein phosphorylation;GO:0048813:dendrite morphogenesis;GO:0006915:apoptotic process;GO:0048261:negative regulation of receptor-mediated endocytos…	GO:0019897:extrinsic component of plasma membrane;GO:0005802:trans-Golgi network;GO:0030027:lamellipodium;GO:0005829:cytosol;GO:0001891:phagocytic cup;GO:0000139:Golgi membrane;GO:0042470:melanosome;GO:0032587:ruffle membrane;GO:0016023:cytoplasmic membrane-bounded vesicle;	GO:0005525:GTP binding;GO:0004674:protein serine/threonine kinase activity;GO:0017137:Rab GTPase binding;GO:0005524:ATP binding;GO:0031996:thioesterase binding;GO:0030742:GTP-dependent protein binding;GO:0000155:phosphorelay sensor kinase activity;GO:0019901:protein kinase binding;GO:0003924:GTPase activity;	K04392	;ko04010 MAPK signaling pathway;ko04013 MAPK signaling pathway - fly;ko04014 Ras signaling pathway;ko04015 Rap1 signaling pathway;ko04024 cAMP signaling pathway;ko04062 Chemokine signaling pathway;ko04071 Sphingolipid signaling pathway;ko04145 Phagosome;ko04151 PI3K-Akt signaling pathway;ko04310 Wnt signaling pathway;ko04360 Axon guidance;ko04361 Axon regeneration;ko04370 VEGF signaling pathway;k…
ENSMUSG00000001855	9659	2334	17.02	1925	16.54	2578	15	2423	18.24	2938	18.04	2554	17.47	2	31864448	31943987	+	Nup214	nucleoporin 214 [Source:MGI Symbol%3BAcc:MGI:1095411]	GO:0051726:regulation of cell cycle;GO:0006606:protein import into nucleus;GO:0006611:protein export from nucleus;GO:0006406:mRNA export from nucleus;	GO:0005643:nuclear pore;GO:0005634:nucleus;	GO:0005487:nucleocytoplasmic transporter activity;	K14317	;ko03013 RNA transport;ko05014 Amyotrophic lateral sclerosis;
ENSMUSG00000001864	4032	1	0.02	1	0.02	0	0	0	0	0	0	0	0	2	31840151	31863454	+	Aif1l	allograft inflammatory factor 1-like [Source:MGI Symbol%3BAcc:MGI:1919598]	-	GO:0042995:cell projection;GO:0005856:cytoskeleton;GO:0005737:cytoplasm;GO:0043234:protein complex;GO:0005886:plasma membrane;	GO:0051015:actin filament binding;GO:0005509:calcium ion binding;	K18617	-
ENSMUSG00000001865	1517	3	0.14	0	0	2	0.07	2	0.1	2	0.08	6	0.26	3	20269784	20296345	-	Cpa3	carboxypeptidase A3%2C mast cell [Source:MGI Symbol%3BAcc:MGI:88479]	GO:0002002:regulation of angiotensin levels in blood;GO:0006508:proteolysis;	GO:0030133:transport vesicle;	GO:0004181:metallocarboxypeptidase activity;GO:0008270:zinc ion binding;	K08780	;ko04614 Renin-angiotensin system;ko04972 Pancreatic secretion;ko04974 Protein digestion and absorption;
ENSMUSG00000001870	10691	1	0.01	0	0	5	0.03	0	0	0	0	0	0	17	75312563	75699507	+	Ltbp1	latent transforming growth factor beta binding protein 1 [Source:MGI Symbol%3BAcc:MGI:109151]	GO:0007179:transforming growth factor beta receptor signaling pathway;	GO:0005578:proteinaceous extracellular matrix;	GO:0005509:calcium ion binding;GO:0019838:growth factor binding;	K19559	;ko04350 TGF-beta signaling pathway;
ENSMUSG00000001891	3069	1023	23.48	903	24.42	1410	25.82	1090	25.83	1306	25.24	1295	27.87	11	21271138	21321201	-	Ugp2	UDP-glucose pyrophosphorylase 2 [Source:MGI Symbol%3BAcc:MGI:2183447]	GO:0019255:glucose 1-phosphate metabolic process;GO:0006011:UDP-glucose metabolic process;	GO:0005737:cytoplasm;	GO:0046872:metal ion binding;GO:0005536:glucose binding;GO:0003983:UTP:glucose-1-phosphate uridylyltransferase activity;GO:0032557:pyrimidine ribonucleotide binding;	K00963	;ko00040 Pentose and glucuronate interconversions;ko00052 Galactose metabolism;ko00500 Starch and sucrose metabolism;ko00520 Amino sugar and nucleotide sugar metabolism;ko00541 O-Antigen nucleotide sugar biosynthesis;ko01100 Metabolic pathways;ko01110 Biosynthesis of secondary metabolites;ko01240 Biosynthesis of cofactors;
ENSMUSG00000001901	3549	0	0	0	0	0	0	0	0	1	0.02	0	0	11	105898950	105925375	+	Kcnh6	potassium voltage-gated channel%2C subfamily H (eag-related)%2C member 6 [Source:MGI Symbol%3BAcc:MGI:2684139]	GO:0051291:protein heterooligomerization;GO:0006355:regulation of transcription, DNA-templated;GO:0006813:potassium ion transport;	GO:0005887:integral component of plasma membrane;	GO:0004871:signal transducer activity;GO:0005242:inward rectifier potassium channel activity;	K04909	-
ENSMUSG00000001909	6306	1301	14.53	1146	15.08	1729	15.41	1265	14.59	1683	15.83	1481	15.51	8	85412936	85426437	+	Trmt1	tRNA methyltransferase 1 [Source:MGI Symbol%3BAcc:MGI:1289155]	GO:0008033:tRNA processing;GO:0032259:methylation;	GO:0005739:mitochondrion;	GO:0016783:sulfurtransferase activity;GO:0008270:zinc ion binding;GO:0005524:ATP binding;GO:0004809:tRNA (guanine-N2-)-methyltransferase activity;GO:0000049:tRNA binding;	K00555	-
ENSMUSG00000001910	4673	2620	39.49	2218	39.39	3121	37.54	2445	38.05	3202	40.64	2838	40.12	8	85397108	85414531	-	Nacc1	nucleus accumbens associated 1%2C BEN and BTB (POZ) domain containing [Source:MGI Symbol%3BAcc:MGI:1914080]	GO:0051260:protein homooligomerization;GO:0008284:positive regulation of cell proliferation;GO:0045892:negative regulation of transcription, DNA-templated;	GO:0016604:nuclear body;GO:0005737:cytoplasm;	GO:0005515:protein binding;	K10486	-
ENSMUSG00000001911	7351	372	3.56	349	3.94	433	3.31	346	3.42	481	3.88	307	2.76	8	85426505	85526973	-	Nfix	nuclear factor I/X [Source:MGI Symbol%3BAcc:MGI:97311]	GO:0045944:positive regulation of transcription from RNA polymerase II promoter;GO:0006260:DNA replication;GO:0000122:negative regulation of transcription from RNA polymerase II promoter;GO:0021707:cerebellar granule cell differentiation;GO:0048708:astrocyte differentiation;GO:0021680:cerebellar Purkinje cell layer development;	GO:0005634:nucleus;	GO:0003677:DNA binding;GO:0003705:RNA polymerase II distal enhancer sequence-specific DNA binding transcription factor activity;GO:0005515:protein binding;GO:0003700:sequence-specific DNA binding transcription factor activity;	K09171	-
ENSMUSG00000001918	4173	5515	93.09	4685	93.17	6911	93.09	5539	96.52	7213	102.51	5881	93.09	7	16515265	16532199	+	Slc1a5	solute carrier family 1 (neutral amino acid transporter)%2C member 5 [Source:MGI Symbol%3BAcc:MGI:105305]	GO:0006835:dicarboxylic acid transport;GO:0003333:amino acid transmembrane transport;GO:0015825:L-serine transport;GO:0006860:extracellular amino acid transport;	GO:0016021:integral component of membrane;	GO:0017153:sodium:dicarboxylate symporter activity;GO:0015194:L-serine transmembrane transporter activity;	K05616	;ko04974 Protein digestion and absorption;ko05230 Central carbon metabolism in cancer;
ENSMUSG00000001924	4819	9139	133.58	7528	129.64	11480	133.91	8025	121.09	9705	119.43	8709	119.38	X	20524565	20549418	+	Uba1	ubiquitin-like modifier activating enzyme 1 [Source:MGI Symbol%3BAcc:MGI:98890]	GO:0016567:protein ubiquitination;	-	GO:0016874:ligase activity;GO:0008641:small protein activating enzyme activity;GO:0005524:ATP binding;	K03178	;ko04120 Ubiquitin mediated proteolysis;ko05012 Parkinson disease;ko05022 Pathways of neurodegeneration - multiple diseases;
ENSMUSG00000001930	16064	2	0.01	4	0.02	3	0.01	19	0.09	8	0.03	22	0.09	6	125523737	125663642	+	Vwf	Von Willebrand factor [Source:MGI Symbol%3BAcc:MGI:98941]	GO:0030168:platelet activation;GO:0001889:liver development;GO:0051260:protein homooligomerization;GO:0001890:placenta development;GO:0031589:cell-substrate adhesion;GO:0042246:tissue regeneration;	GO:0009897:external side of plasma membrane;GO:0033093:Weibel-Palade body;GO:0005578:proteinaceous extracellular matrix;GO:0005783:endoplasmic reticulum;	GO:0047485:protein N-terminus binding;GO:0051087:chaperone binding;GO:0001948:glycoprotein binding;GO:0002020:protease binding;GO:0019865:immunoglobulin binding;GO:0005518:collagen binding;GO:0005178:integrin binding;GO:0042803:protein homodimerization activity;	K03900	;ko04151 PI3K-Akt signaling pathway;ko04510 Focal adhesion;ko04512 ECM-receptor interaction;ko04610 Complement and coagulation cascades;ko04611 Platelet activation;ko04613 Neutrophil extracellular trap formation;ko05165 Human papillomavirus infection;ko05171 Coronavirus disease - COVID-19;
ENSMUSG00000001942	10497	306	2.05	264	2.09	362	1.94	319	2.21	445	2.51	392	2.47	9	37466994	37560951	+	Siae	sialic acid acetylesterase [Source:MGI Symbol%3BAcc:MGI:104803]	-	GO:0005764:lysosome;	GO:0001681:sialate O-acetylesterase activity;	K05970	-
ENSMUSG00000001943	1979	0	0	0	0	1	0.03	0	0	0	0	0	0	9	37450551	37455501	+	Vsig2	V-set and immunoglobulin domain containing 2 [Source:MGI Symbol%3BAcc:MGI:1928009]	-	GO:0005887:integral component of plasma membrane;	-	-	-
ENSMUSG00000001946	2867	0	0	0	0	4	0.08	1	0.03	0	0	1	0.02	9	37439374	37449615	+	Esam	endothelial cell-specific adhesion molecule [Source:MGI Symbol%3BAcc:MGI:1916774]	GO:0016338:calcium-independent cell-cell adhesion via plasma membrane cell-adhesion molecules;GO:0007156:homophilic cell adhesion via plasma membrane adhesion molecules;	GO:0016021:integral component of membrane;GO:0005923:bicellular tight junction;GO:0005886:plasma membrane;GO:0005912:adherens junction;	-	K06787	;ko04514 Cell adhesion molecules;ko04670 Leukocyte transendothelial migration;
ENSMUSG00000001948	1061	8	0.53	9	0.7	9	0.48	8	0.55	9	0.5	12	0.75	9	37514586	37525018	-	Spa17	sperm autoantigenic protein 17 [Source:MGI Symbol%3BAcc:MGI:1333778]	GO:0001539:cilium or flagellum-dependent cell motility;GO:0007339:binding of sperm to zona pellucida;	GO:0005737:cytoplasm;GO:0072372:primary cilium;GO:0031514:motile cilium;	-	-	-
ENSMUSG00000001962	2288	568	17.49	522	18.93	752	18.47	665	21.13	817	21.18	740	21.36	X	73356639	73363755	+	Fam50a	family with sequence similarity 50%2C member A [Source:MGI Symbol%3BAcc:MGI:1351626]	-	-	-	K13119	-
ENSMUSG00000001964	2517	869	24.32	753	24.83	1081	24.14	798	23.05	959	22.6	893	23.44	X	73298293	73305154	+	Emd	emerin [Source:MGI Symbol%3BAcc:MGI:108117]	GO:0071363:cellular response to growth factor stimulus;GO:0035414:negative regulation of catenin import into nucleus;GO:0060828:regulation of canonical Wnt signaling pathway;GO:0031468:nuclear envelope reassembly;GO:0046827:positive regulation of protein export from nucleus;GO:0035914:skeletal muscle cell differentiation;GO:0048147:negative regulation of fibroblast proliferation;	GO:0005637:nuclear inner membrane;GO:0005652:nuclear lamina;GO:0005640:nuclear outer membrane;GO:0016021:integral component of membrane;GO:0005874:microtubule;GO:0005819:spindle;GO:0005783:endoplasmic reticulum;	GO:0003779:actin binding;GO:0048487:beta-tubulin binding;	K12569	;ko05410 Hypertrophic cardiomyopathy;ko05412 Arrhythmogenic right ventricular cardiomyopathy;ko05414 Dilated cardiomyopathy;
ENSMUSG00000001983	1383	289	14.72	271	16.26	402	16.34	316	16.61	371	15.91	322	15.38	11	105956887	105964438	+	Taco1	translational activator of mitochondrially encoded cytochrome c oxidase I [Source:MGI Symbol%3BAcc:MGI:1917457]	GO:0006417:regulation of translation;	GO:0005739:mitochondrion;	-	K18189	-
ENSMUSG00000001985	8973	0	0	0	0	1	0.01	1	0.01	0	0	0	0	4	125384493	125607966	+	Grik3	glutamate receptor%2C ionotropic%2C kainate 3 [Source:MGI Symbol%3BAcc:MGI:95816]	GO:0007196:adenylate cyclase-inhibiting G-protein coupled glutamate receptor signaling pathway;GO:0006811:ion transport;GO:0035235:ionotropic glutamate receptor signaling pathway;GO:0042391:regulation of membrane potential;GO:0051967:negative regulation of synaptic transmission, glutamatergic;	GO:0032839:dendrite cytoplasm;GO:0030054:cell junction;GO:0043195:terminal bouton;GO:0045211:postsynaptic membrane;GO:0005887:integral component of plasma membrane;GO:0043204:perikaryon;	GO:0005234:extracellular-glutamate-gated ion channel activity;GO:0005515:protein binding;GO:0015277:kainate selective glutamate receptor activity;GO:0001640:adenylate cyclase inhibiting G-protein coupled glutamate receptor activity;	K05203	;ko04080 Neuroactive ligand-receptor interaction;ko04724 Glutamatergic synapse;
ENSMUSG00000001986	9859	0	0	0	0	0	0	0	0	0	0	0	0	X	40489731	40767478	+	Gria3	glutamate receptor%2C ionotropic%2C AMPA3 (alpha 3) [Source:MGI Symbol%3BAcc:MGI:95810]	GO:0006811:ion transport;GO:0035235:ionotropic glutamate receptor signaling pathway;GO:0001919:regulation of receptor recycling;GO:0006810:transport;GO:0007215:glutamate receptor signaling pathway;GO:0007268:synaptic transmission;	GO:0030054:cell junction;GO:0043083:synaptic cleft;GO:0043195:terminal bouton;GO:0032281:alpha-amino-3-hydroxy-5-methyl-4-isoxazolepropionic acid selective glutamate receptor complex;GO:0043198:dendritic shaft;GO:0045211:postsynaptic membrane;GO:0014069:postsynaptic density;GO:0032279:asymmetric synapse;GO:0043204:perikaryon;GO:0030666:endocytic vesicle membrane;	GO:0005234:extracellular-glutamate-gated ion channel activity;GO:0004971:alpha-amino-3-hydroxy-5-methyl-4-isoxazole propionate selective glutamate receptor activity;GO:0030165:PDZ domain binding;	K05199	;ko04024 cAMP signaling pathway;ko04080 Neuroactive ligand-receptor interaction;ko04713 Circadian entrainment;ko04723 Retrograde endocannabinoid signaling;ko04724 Glutamatergic synapse;ko04728 Dopaminergic synapse;ko04730 Long-term depression;ko05016 Huntington disease;ko05017 Spinocerebellar ataxia;ko05022 Pathways of neurodegeneration - multiple diseases;ko05031 Amphetamine addiction;ko05033 Ni…
ENSMUSG00000001988	3009	19	0.44	14	0.39	29	0.54	13	0.31	27	0.53	16	0.35	7	16189646	16211653	-	Npas1	neuronal PAS domain protein 1 [Source:MGI Symbol%3BAcc:MGI:109205]	GO:0000122:negative regulation of transcription from RNA polymerase II promoter;GO:0007165:signal transduction;GO:0007610:behavior;	GO:0005634:nucleus;	GO:0004871:signal transducer activity;GO:0003677:DNA binding;GO:0046983:protein dimerization activity;	K09098	-
ENSMUSG00000001995	9617	118	0.86	112	0.97	141	0.82	97	0.73	130	0.8	106	0.73	8	126144802	126296547	-	Sipa1l2	signal-induced proliferation-associated 1 like 2 [Source:MGI Symbol%3BAcc:MGI:2676970]	GO:0051056:regulation of small GTPase mediated signal transduction;	-	GO:0005096:GTPase activator activity;	K17702	;ko04015 Rap1 signaling pathway;
ENSMUSG00000001998	9810	526	3.78	449	3.8	621	3.56	555	4.11	658	3.98	580	3.91	2	126850637	126909829	+	Ap4e1	adaptor-related protein complex AP-4%2C epsilon 1 [Source:MGI Symbol%3BAcc:MGI:1336993]	GO:0016192:vesicle-mediated transport;GO:0006886:intracellular protein transport;	GO:0030117:membrane coat;GO:0005802:trans-Golgi network;GO:0030126:COPI vesicle coat;	GO:0005198:structural molecule activity;	K12400	;ko04142 Lysosome;
ENSMUSG00000001999	2446	1609	46.33	1412	47.91	2361	54.26	1991	59.19	2454	59.5	2111	57.01	2	126912585	126939004	+	Blvra	biliverdin reductase A [Source:MGI Symbol%3BAcc:MGI:88170]	GO:0042167:heme catabolic process;GO:0055114:oxidation-reduction process;	GO:0005737:cytoplasm;	GO:0004074:biliverdin reductase activity;GO:0008270:zinc ion binding;GO:0000166:nucleotide binding;GO:0046872:metal ion binding;	K00214	;ko00860 Porphyrin and chlorophyll metabolism;ko01100 Metabolic pathways;ko01110 Biosynthesis of secondary metabolites;
ENSMUSG00000002006	3970	12	0.21	4	0.08	14	0.2	6	0.11	6	0.09	14	0.23	X	72836965	72868575	-	Pdzd4	PDZ domain containing 4 [Source:MGI Symbol%3BAcc:MGI:2443483]	-	GO:0005737:cytoplasm;	-	K15682	-
ENSMUSG00000002007	2784	12	0.3	5	0.15	6	0.12	7	0.18	5	0.11	3	0.07	X	72818011	72822531	+	Srpk3	serine/arginine-rich protein specific kinase 3 [Source:MGI Symbol%3BAcc:MGI:1891338]	-	-	-	K08832	-
ENSMUSG00000002010	2701	2144	55.91	1838	56.47	2709	56.38	2011	54.14	2402	52.74	2320	56.74	X	72822569	72830503	-	Idh3g	isocitrate dehydrogenase 3 (NAD+)%2C gamma [Source:MGI Symbol%3BAcc:MGI:1099463]	GO:0045926:negative regulation of growth;GO:0006103:2-oxoglutarate metabolic process;GO:0006734:NADH metabolic process;GO:0006099:tricarboxylic acid cycle;GO:0006102:isocitrate metabolic process;	GO:0005962:mitochondrial isocitrate dehydrogenase complex (NAD+);GO:0005730:nucleolus;	GO:0051287:NAD binding;GO:0004449:isocitrate dehydrogenase (NAD+) activity;GO:0005524:ATP binding;GO:0000287:magnesium ion binding;	K00030	;ko00020 Citrate cycle (TCA cycle);ko01100 Metabolic pathways;ko01110 Biosynthesis of secondary metabolites;ko01120 Microbial metabolism in diverse environments;ko01200 Carbon metabolism;ko01210 2-Oxocarboxylic acid metabolism;ko01230 Biosynthesis of amino acids;
ENSMUSG00000002012	1971	0	0	0	0	2	0.06	0	0	0	0	0	0	X	72699600	72703723	-	Pnck	pregnancy upregulated non-ubiquitously expressed CaM kinase [Source:MGI Symbol%3BAcc:MGI:1347357]	GO:0006468:protein phosphorylation;	GO:0005737:cytoplasm;GO:0005954:calcium- and calmodulin-dependent protein kinase complex;GO:0005634:nucleus;	GO:0004683:calmodulin-dependent protein kinase activity;GO:0005524:ATP binding;GO:0005516:calmodulin binding;	K08795	-
ENSMUSG00000002014	3096	1820	41.41	1473	39.48	2623	47.62	1708	40.12	2129	40.78	1948	41.56	X	72830634	72834436	+	Ssr4	signal sequence receptor%2C delta [Source:MGI Symbol%3BAcc:MGI:1099464]	-	GO:0016021:integral component of membrane;GO:0005784:Sec61 translocon complex;	-	K04571	;ko04141 Protein processing in endoplasmic reticulum;
ENSMUSG00000002015	1219	1720	99.38	1562	106.34	2398	110.58	1644	98.07	2014	97.98	1801	97.59	X	72729784	72759781	-	Bcap31	B cell receptor associated protein 31 [Source:MGI Symbol%3BAcc:MGI:1350933]	GO:0016192:vesicle-mediated transport;GO:0035584:calcium-mediated signaling using intracellular calcium source;GO:0051561:positive regulation of mitochondrial calcium ion concentration;GO:2001244:positive regulation of intrinsic apoptotic signaling pathway;GO:0043280:positive regulation of cysteine-type endopeptidase activity involved in apoptotic process;GO:0006955:immune response;GO:0007204:pos…	GO:0000139:Golgi membrane;GO:0005811:lipid particle;GO:0005783:endoplasmic reticulum;GO:0005887:integral component of plasma membrane;	-	K14009	;ko04141 Protein processing in endoplasmic reticulum;ko05165 Human papillomavirus infection;
ENSMUSG00000002017	3564	1480	29.25	1208	28.13	1778	28.04	1566	31.95	1841	30.63	1708	31.66	17	75844081	75858941	-	Fam98a	family with sequence similarity 98%2C member A [Source:MGI Symbol%3BAcc:MGI:1919972]	-	-	-	-	-
ENSMUSG00000002020	8184	4	0.03	4	0.04	7	0.05	0	0	1	0.01	3	0.02	12	84829986	84923306	-	Ltbp2	latent transforming growth factor beta binding protein 2 [Source:MGI Symbol%3BAcc:MGI:99502]	GO:0030502:negative regulation of bone mineralization;GO:0060349:bone morphogenesis;GO:0007179:transforming growth factor beta receptor signaling pathway;GO:0032331:negative regulation of chondrocyte differentiation;GO:0060430:lung saccule development;GO:0045780:positive regulation of bone resorption;	GO:0070062:extracellular exosome;GO:0005615:extracellular space;GO:0005578:proteinaceous extracellular matrix;	GO:0005509:calcium ion binding;GO:0019838:growth factor binding;GO:0008201:heparin binding;	K08023	-
ENSMUSG00000002028	16670	1817	7.68	1406	7	1753	5.91	1737	7.58	2471	8.79	1656	6.56	9	44714652	44792594	-	Kmt2a	lysine (K)-specific methyltransferase 2A [Source:MGI Symbol%3BAcc:MGI:96995]	GO:0051569:regulation of histone H3-K4 methylation;GO:0032411:positive regulation of transporter activity;GO:0006461:protein complex assembly;GO:0035162:embryonic hemopoiesis;GO:2001040:positive regulation of cellular response to drug;GO:0008285:negative regulation of cell proliferation;GO:0006306:DNA methylation;GO:0009952:anterior/posterior pattern specification;GO:0045944:positive regulation o…	GO:0071339:MLL1 complex;GO:0005634:nucleus;	GO:0008270:zinc ion binding;GO:0045322:unmethylated CpG binding;GO:0044212:transcription regulatory region DNA binding;GO:0042800:histone methyltransferase activity (H3-K4 specific);GO:0042803:protein homodimerization activity;GO:0003682:chromatin binding;GO:0070577:lysine-acetylated histone binding;GO:0005515:protein binding;GO:0003677:DNA binding;	K09186	;ko00310 Lysine degradation;ko01100 Metabolic pathways;ko04934 Cushing syndrome;ko05202 Transcriptional misregulation in cancer;
ENSMUSG00000002031	6416	529	5.81	440	5.69	625	5.48	472	5.35	643	5.94	586	6.03	9	44679205	44704744	+	Ift46	intraflagellar transport 46 [Source:MGI Symbol%3BAcc:MGI:1923818]	GO:0031647:regulation of protein stability;GO:0042073:intraciliary transport;GO:0015031:protein transport;	GO:0043234:protein complex;GO:0031512:motile primary cilium;GO:0060170:ciliary membrane;GO:0005737:cytoplasm;	GO:0005515:protein binding;	K19682	-
ENSMUSG00000002032	3212	6	0.13	6	0.16	9	0.16	7	0.16	11	0.2	7	0.14	9	44705066	44710604	-	Tmem25	transmembrane protein 25 [Source:MGI Symbol%3BAcc:MGI:1918937]	-	GO:0005576:extracellular region;GO:0005886:plasma membrane;GO:0016021:integral component of membrane;	-	-	-
ENSMUSG00000002033	3269	0	0	0	0	0	0	0	0	0	0	0	0	9	44880870	44891729	-	Cd3g	CD3 antigen%2C gamma polypeptide [Source:MGI Symbol%3BAcc:MGI:88333]	GO:0042981:regulation of apoptotic process;GO:0007163:establishment or maintenance of cell polarity;GO:0007166:cell surface receptor signaling pathway;GO:0015031:protein transport;	GO:0042105:alpha-beta T cell receptor complex;GO:0016021:integral component of membrane;	GO:0004888:transmembrane signaling receptor activity;GO:0046982:protein heterodimerization activity;	K06452	;ko04640 Hematopoietic cell lineage;ko04658 Th1 and Th2 cell differentiation;ko04659 Th17 cell differentiation;ko04660 T cell receptor signaling pathway;ko05142 Chagas disease;ko05162 Measles;ko05166 Human T-cell leukemia virus 1 infection;ko05169 Epstein-Barr virus infection;ko05170 Human immunodeficiency virus 1 infection;ko05235 PD-L1 expression and PD-1 checkpoint pathway in cancer;
ENSMUSG00000002043	1589	338	14.98	278	14.52	472	16.7	311	14.23	446	16.65	377	15.67	7	19242320	19250070	+	Trappc6a	trafficking protein particle complex 6A [Source:MGI Symbol%3BAcc:MGI:1914341]	GO:0016192:vesicle-mediated transport;GO:0006810:transport;	GO:0005783:endoplasmic reticulum;GO:0005794:Golgi apparatus;GO:0044444:cytoplasmic part;GO:0043231:intracellular membrane-bounded organelle;	-	-	-
ENSMUSG00000002052	7095	3889	38.61	3354	39.23	4525	35.85	3625	37.15	4668	39.02	3849	35.83	11	78097572	78136813	-	Supt6	SPT6%2C histone chaperone and transcription elongation factor [Source:MGI Symbol%3BAcc:MGI:107726]	GO:0006357:regulation of transcription from RNA polymerase II promoter;GO:0032784:regulation of DNA-templated transcription, elongation;	GO:0005634:nucleus;	GO:0016788:hydrolase activity, acting on ester bonds;GO:0003723:RNA binding;	K11292	-
ENSMUSG00000002055	5624	1393	17.45	1259	18.58	1809	18.08	1311	16.95	1550	16.34	1409	16.55	11	78192355	78213283	+	Spag5	sperm associated antigen 5 [Source:MGI Symbol%3BAcc:MGI:1927470]	GO:0000070:mitotic sister chromatid segregation;GO:0051301:cell division;GO:0000090:mitotic anaphase;GO:0051988:regulation of attachment of spindle microtubules to kinetochore;GO:0007051:spindle organization;	GO:0072686:mitotic spindle;GO:0005730:nucleolus;GO:0005876:spindle microtubule;GO:0000776:kinetochore;GO:0035371:microtubule plus-end;GO:0005737:cytoplasm;	GO:0008017:microtubule binding;	-	-
ENSMUSG00000002057	3214	0	0	0	0	0	0	0	0	0	0	0	0	11	78248403	78277384	-	Foxn1	forkhead box N1 [Source:MGI Symbol%3BAcc:MGI:102949]	GO:0000122:negative regulation of transcription from RNA polymerase II promoter;GO:0033081:regulation of T cell differentiation in thymus;GO:0050673:epithelial cell proliferation;GO:0007389:pattern specification process;GO:0001942:hair follicle development;GO:0035878:nail development;GO:0051090:regulation of sequence-specific DNA binding transcription factor activity;GO:0009790:embryo development…	GO:0005667:transcription factor complex;	GO:0003705:RNA polymerase II distal enhancer sequence-specific DNA binding transcription factor activity;GO:0043565:sequence-specific DNA binding;GO:0003690:double-stranded DNA binding;GO:0008134:transcription factor binding;GO:0008301:DNA binding, bending;	K09407	-
ENSMUSG00000002058	2448	411	11.83	353	11.97	607	13.94	430	12.77	535	12.96	461	12.44	11	78234308	78239990	+	Unc119	unc-119 lipid binding chaperone [Source:MGI Symbol%3BAcc:MGI:1328357]	GO:0050896:response to stimulus;GO:0007601:visual perception;GO:0042953:lipoprotein transport;GO:0007268:synaptic transmission;GO:0007602:phototransduction;	GO:0005737:cytoplasm;GO:0005813:centrosome;GO:0005829:cytosol;	GO:0008289:lipid binding;GO:0005515:protein binding;	-	-
ENSMUSG00000002059	2385	679	20.05	589	20.49	877	20.67	717	21.86	864	21.48	813	22.52	11	78079256	78083019	+	Rab34	RAB34%2C member RAS oncogene family [Source:MGI Symbol%3BAcc:MGI:104606]	GO:0015031:protein transport;GO:0007264:small GTPase mediated signal transduction;GO:0090385:phagosome-lysosome fusion;	GO:0045335:phagocytic vesicle;GO:0005794:Golgi apparatus;GO:0001726:ruffle;GO:0005769:early endosome;GO:0030670:phagocytic vesicle membrane;	GO:0005525:GTP binding;GO:0003924:GTPase activity;	K07921	-
ENSMUSG00000002064	1515	404	18.78	307	16.82	612	22.71	414	19.87	521	20.39	445	19.4	11	78136572	78146322	+	Sdf2	stromal cell derived factor 2 [Source:MGI Symbol%3BAcc:MGI:108019]	-	GO:0016020:membrane;GO:0005576:extracellular region;	-	-	-
ENSMUSG00000002068	2662	771	20.4	666	20.76	975	20.59	814	22.24	1075	23.95	896	22.23	7	37797409	37806959	-	Ccne1	cyclin E1 [Source:MGI Symbol%3BAcc:MGI:88316]	GO:0016055:Wnt signaling pathway;GO:0000079:regulation of cyclin-dependent protein serine/threonine kinase activity;GO:0051301:cell division;GO:0045597:positive regulation of cell differentiation;GO:0006270:DNA replication initiation;	GO:0000307:cyclin-dependent protein kinase holoenzyme complex;GO:0005813:centrosome;GO:0005737:cytoplasm;GO:0005634:nucleus;	GO:0032403:protein complex binding;GO:0016301:kinase activity;GO:0019901:protein kinase binding;GO:0016538:cyclin-dependent protein serine/threonine kinase regulator activity;	K06626	;ko04110 Cell cycle;ko04114 Oocyte meiosis;ko04115 p53 signaling pathway;ko04151 PI3K-Akt signaling pathway;ko04218 Cellular senescence;ko04391 Hippo signaling pathway - fly;ko04934 Cushing syndrome;ko05161 Hepatitis B;ko05162 Measles;ko05165 Human papillomavirus infection;ko05166 Human T-cell leukemia virus 1 infection;ko05169 Epstein-Barr virus infection;ko05200 Pathways in cancer;ko05203 Viral…
ENSMUSG00000002076	3589	2	0.04	3	0.07	6	0.09	0	0	2	0.03	0	0	17	32163743	32255323	-	Hsf2bp	heat shock transcription factor 2 binding protein [Source:MGI Symbol%3BAcc:MGI:1921627]	GO:0006950:response to stress;	GO:0005829:cytosol;	-	-	-
ENSMUSG00000002083	2124	176	5.84	173	6.76	259	6.85	211	7.22	238	6.65	209	6.5	7	16042318	16052130	+	Bbc3	BCL2 binding component 3 [Source:MGI Symbol%3BAcc:MGI:2181667]	GO:0048519:negative regulation of biological process;GO:0006874:cellular calcium ion homeostasis;GO:0032879:regulation of localization;GO:2001233:regulation of apoptotic signaling pathway;GO:0010822:positive regulation of mitochondrion organization;GO:0097193:intrinsic apoptotic signaling pathway;GO:0034976:response to endoplasmic reticulum stress;GO:0043065:positive regulation of apoptotic proce…	GO:0005739:mitochondrion;	-	K10132	;ko01524 Platinum drug resistance;ko04115 p53 signaling pathway;ko04210 Apoptosis;ko04215 Apoptosis - multiple species;ko04390 Hippo signaling pathway;ko05016 Huntington disease;ko05162 Measles;ko05200 Pathways in cancer;ko05210 Colorectal cancer;
ENSMUSG00000002100	4163	2	0.03	1	0.02	2	0.03	2	0.03	2	0.03	0	0	2	90948489	90966861	+	Mybpc3	myosin binding protein C%2C cardiac [Source:MGI Symbol%3BAcc:MGI:102844]	GO:0002027:regulation of heart rate;GO:0055010:ventricular cardiac muscle tissue morphogenesis;GO:0045214:sarcomere organization;GO:0031034:myosin filament assembly;GO:0007155:cell adhesion;GO:0060048:cardiac muscle contraction;	GO:0031672:A band;GO:0005863:striated muscle myosin thick filament;	GO:0008307:structural constituent of muscle;GO:0046872:metal ion binding;GO:0032036:myosin heavy chain binding;GO:0003779:actin binding;GO:0005200:structural constituent of cytoskeleton;	K12568	;ko05410 Hypertrophic cardiomyopathy;ko05414 Dilated cardiomyopathy;
ENSMUSG00000002102	2607	2757	74.49	2385	75.92	3776	81.42	2594	72.35	3081	70.09	3017	76.44	2	90884354	90896714	+	Psmc3	proteasome (prosome%2C macropain) 26S subunit%2C ATPase 3 [Source:MGI Symbol%3BAcc:MGI:1098754]	GO:0000209:protein polyubiquitination;GO:0006521:regulation of cellular amino acid metabolic process;GO:0051437:positive regulation of ubiquitin-protein ligase activity involved in regulation of mitotic cell cycle transition;GO:0042981:regulation of apoptotic process;GO:0010467:gene expression;GO:0051436:negative regulation of ubiquitin-protein ligase activity involved in mitotic cell cycle;GO:00…	GO:0005654:nucleoplasm;GO:0022624:proteasome accessory complex;GO:0005829:cytosol;GO:0000932:cytoplasmic mRNA processing body;GO:0048471:perinuclear region of cytoplasm;GO:0005634:nucleus;	GO:0003714:transcription corepressor activity;GO:0005515:protein binding;GO:0017111:nucleoside-triphosphatase activity;GO:0003713:transcription coactivator activity;GO:0005524:ATP binding;	K03065	;ko03050 Proteasome;ko05010 Alzheimer disease;ko05012 Parkinson disease;ko05014 Amyotrophic lateral sclerosis;ko05016 Huntington disease;ko05017 Spinocerebellar ataxia;ko05020 Prion disease;ko05022 Pathways of neurodegeneration - multiple diseases;ko05169 Epstein-Barr virus infection;
ENSMUSG00000002103	5186	474	6.44	400	6.4	591	6.41	504	7.07	617	7.06	589	7.5	2	91033230	91044443	+	Acp2	acid phosphatase 2%2C lysosomal [Source:MGI Symbol%3BAcc:MGI:87882]	GO:0048102:autophagic cell death;GO:0016311:dephosphorylation;GO:0001501:skeletal system development;GO:0010033:response to organic substance;GO:0007040:lysosome organization;	GO:0043005:neuron projection;GO:0005764:lysosome;GO:0016021:integral component of membrane;GO:0031410:cytoplasmic vesicle;	GO:0003993:acid phosphatase activity;GO:0004721:phosphoprotein phosphatase activity;GO:0001784:phosphotyrosine binding;	K14410	;ko00740 Riboflavin metabolism;ko01100 Metabolic pathways;ko04142 Lysosome;
ENSMUSG00000002104	1802	0	0	0	0	1	0.03	1	0.04	1	0.03	3	0.11	2	90865965	90876074	+	Rapsn	receptor-associated protein of the synapse [Source:MGI Symbol%3BAcc:MGI:99422]	GO:0043525:positive regulation of neuron apoptotic process;GO:0007271:synaptic transmission, cholinergic;	GO:0030054:cell junction;GO:0005856:cytoskeleton;GO:0031594:neuromuscular junction;GO:0045211:postsynaptic membrane;GO:0005794:Golgi apparatus;GO:0005886:plasma membrane;	GO:0008270:zinc ion binding;GO:0035255:ionotropic glutamate receptor binding;GO:0033130:acetylcholine receptor binding;	-	-
ENSMUSG00000002105	4869	377	5.45	344	5.86	451	5.21	364	5.44	400	4.87	358	4.86	2	90892136	90900762	-	Slc39a13	solute carrier family 39 (metal ion transporter)%2C member 13 [Source:MGI Symbol%3BAcc:MGI:1915677]	GO:0006882:cellular zinc ion homeostasis;GO:0071577:zinc II ion transmembrane transport;GO:0061448:connective tissue development;	GO:0005794:Golgi apparatus;GO:0016021:integral component of membrane;GO:0048471:perinuclear region of cytoplasm;	GO:0042803:protein homodimerization activity;GO:0005385:zinc ion transmembrane transporter activity;	K14719	-
ENSMUSG00000002107	25884	2227	6.06	1936	6.21	2582	5.61	1790	5.03	2221	5.09	1978	5.05	2	6544505	7514374	-	Celf2	CUGBP%2C Elav-like family member 2 [Source:MGI Symbol%3BAcc:MGI:1338822]	GO:0006376:mRNA splice site selection;GO:0006397:mRNA processing;GO:0008016:regulation of heart contraction;	GO:0005737:cytoplasm;GO:0005634:nucleus;GO:0044424:intracellular part;	GO:0003723:RNA binding;GO:0000166:nucleotide binding;GO:1901363:heterocyclic compound binding;GO:0097159:organic cyclic compound binding;	K13207	-
ENSMUSG00000002108	2515	28	0.78	29	0.96	39	0.87	48	1.39	37	0.87	51	1.34	2	91014406	91033179	-	Nr1h3	nuclear receptor subfamily 1%2C group H%2C member 3 [Source:MGI Symbol%3BAcc:MGI:1352462]	GO:0050728:negative regulation of inflammatory response;GO:0010870:positive regulation of receptor biosynthetic process;GO:0043277:apoptotic cell clearance;GO:0051006:positive regulation of lipoprotein lipase activity;GO:0034145:positive regulation of toll-like receptor 4 signaling pathway;GO:0010875:positive regulation of cholesterol efflux;GO:0090341:negative regulation of secretion of lysosoma…	GO:0000790:nuclear chromatin;GO:0005737:cytoplasm;GO:0005654:nucleoplasm;	GO:0004879:ligand-activated sequence-specific DNA binding RNA polymerase II transcription factor activity;GO:0003707:steroid hormone receptor activity;GO:0046965:retinoid X receptor binding;GO:0008270:zinc ion binding;GO:0046982:protein heterodimerization activity;GO:0032810:sterol response element binding;GO:0043565:sequence-specific DNA binding;GO:0015485:cholesterol binding;GO:0003713:transcri…	K08536	;ko03320 PPAR signaling pathway;ko04931 Insulin resistance;ko04932 Non-alcoholic fatty liver disease;ko05160 Hepatitis C;
ENSMUSG00000002109	2736	80	2.06	75	2.27	99	2.03	88	2.34	94	2.04	73	1.76	2	91041917	91067327	-	Ddb2	damage specific DNA binding protein 2 [Source:MGI Symbol%3BAcc:MGI:1355314]	GO:0051865:protein autoubiquitination;GO:0000209:protein polyubiquitination;GO:0006290:pyrimidine dimer repair;GO:0009411:response to UV;	GO:0043234:protein complex;	GO:0004842:ubiquitin-protein transferase activity;	K10140	;ko03420 Nucleotide excision repair;ko04115 p53 signaling pathway;ko04120 Ubiquitin mediated proteolysis;ko05161 Hepatitis B;ko05169 Epstein-Barr virus infection;ko05200 Pathways in cancer;ko05202 Transcriptional misregulation in cancer;ko05210 Colorectal cancer;ko05212 Pancreatic cancer;ko05213 Endometrial cancer;ko05214 Glioma;ko05216 Thyroid cancer;ko05217 Basal cell carcinoma;ko05218 Melanoma…
ENSMUSG00000002111	2695	3110	81.28	2776	85.48	4348	90.69	2834	76.47	3316	72.97	3089	75.71	2	90912735	90946101	+	Spi1	spleen focus forming virus (SFFV) proviral integration oncogene [Source:MGI Symbol%3BAcc:MGI:98282]	GO:0030225:macrophage differentiation;GO:0060033:anatomical structure regression;GO:0090241:negative regulation of histone H4 acetylation;GO:0044027:hypermethylation of CpG island;GO:0001944:vasculature development;GO:0045892:negative regulation of transcription, DNA-templated;GO:0045646:regulation of erythrocyte differentiation;GO:0035019:somatic stem cell maintenance;GO:0002320:lymphoid progeni…	GO:0005667:transcription factor complex;GO:0000790:nuclear chromatin;	GO:0000980:RNA polymerase II distal enhancer sequence-specific DNA binding;GO:0001205:RNA polymerase II distal enhancer sequence-specific DNA binding transcription factor activity involved in positive regulation of transcription;GO:0001047:core promoter binding;GO:0051525:NFAT protein binding;GO:0001085:RNA polymerase II transcription factor binding;GO:0003723:RNA binding;	K09438	;ko04380 Osteoclast differentiation;ko05166 Human T-cell leukemia virus 1 infection;ko05200 Pathways in cancer;ko05202 Transcriptional misregulation in cancer;ko05221 Acute myeloid leukemia;
ENSMUSG00000002129	6147	2907	33.31	2552	34.45	3430	31.37	2741	32.42	3329	32.12	2962	31.83	11	4110350	4132541	+	Sf3a1	splicing factor 3a%2C subunit 1 [Source:MGI Symbol%3BAcc:MGI:1914715]	GO:0000398:mRNA splicing, via spliceosome;	GO:0005684:U2-type spliceosomal complex;GO:0071013:catalytic step 2 spliceosome;	GO:0003723:RNA binding;	K12825	;ko03040 Spliceosome;
ENSMUSG00000002147	4402	2180	34.88	1790	33.75	2571	32.83	2244	37.07	2671	35.98	2518	37.78	10	127478855	127496826	+	Stat6	signal transducer and activator of transcription 6 [Source:MGI Symbol%3BAcc:MGI:103034]	GO:0060443:mammary gland morphogenesis;GO:0000122:negative regulation of transcription from RNA polymerase II promoter;GO:0033598:mammary gland epithelial cell proliferation;GO:0042127:regulation of cell proliferation;GO:0002296:T-helper 1 cell lineage commitment;GO:0002829:negative regulation of type 2 immune response;GO:0019221:cytokine-mediated signaling pathway;GO:0048295:positive regulation …	GO:0005737:cytoplasm;GO:0005730:nucleolus;GO:0000790:nuclear chromatin;	GO:0004871:signal transducer activity;GO:0000979:RNA polymerase II core promoter sequence-specific DNA binding;GO:0005509:calcium ion binding;GO:0042802:identical protein binding;GO:0003700:sequence-specific DNA binding transcription factor activity;	K11225	;ko04217 Necroptosis;ko04630 JAK-STAT signaling pathway;ko04658 Th1 and Th2 cell differentiation;ko04659 Th17 cell differentiation;ko05161 Hepatitis B;ko05200 Pathways in cancer;ko05321 Inflammatory bowel disease;
ENSMUSG00000002190	4025	18	0.31	26	0.54	15	0.21	19	0.34	21	0.31	26	0.43	8	84116496	84155181	+	Clgn	calmegin [Source:MGI Symbol%3BAcc:MGI:107472]	GO:0007126:meiotic nuclear division;GO:0006457:protein folding;GO:0007283:spermatogenesis;GO:0006461:protein complex assembly;GO:0007339:binding of sperm to zona pellucida;GO:0030154:cell differentiation;GO:0007275:multicellular organismal development;	GO:0016021:integral component of membrane;GO:0005635:nuclear envelope;GO:0005783:endoplasmic reticulum;	GO:0005509:calcium ion binding;GO:0051082:unfolded protein binding;	K09551	-
ENSMUSG00000002204	2660	494	13.08	452	14.1	799	16.88	539	14.73	589	13.13	584	14.5	7	44221804	44236286	+	Napsa	napsin A aspartic peptidase [Source:MGI Symbol%3BAcc:MGI:109365]	GO:0033619:membrane protein proteolysis;GO:0043129:surfactant homeostasis;	GO:0005615:extracellular space;GO:0005764:lysosome;GO:0097208:alveolar lamellar body;	GO:0005515:protein binding;GO:0004190:aspartic-type endopeptidase activity;	K08565	;ko04142 Lysosome;
ENSMUSG00000002205	6744	345	3.6	270	3.32	474	3.95	394	4.25	500	4.4	403	3.95	7	44397837	44426939	+	Vrk3	vaccinia related kinase 3 [Source:MGI Symbol%3BAcc:MGI:2182465]	GO:0032516:positive regulation of phosphoprotein phosphatase activity;GO:0070373:negative regulation of ERK1 and ERK2 cascade;GO:0006468:protein phosphorylation;	GO:0005634:nucleus;	GO:0004672:protein kinase activity;GO:0005524:ATP binding;GO:0019903:protein phosphatase binding;	K08816	-
ENSMUSG00000002210	3702	519	9.87	400	8.97	627	9.52	546	10.72	652	10.44	535	9.55	7	24099044	24122203	+	Smg9	smg-9 homolog%2C nonsense mediated mRNA decay factor (C. elegans) [Source:MGI Symbol%3BAcc:MGI:1919247]	GO:0000184:nuclear-transcribed mRNA catabolic process, nonsense-mediated decay;	GO:0005622:intracellular;	GO:0042802:identical protein binding;	K18735	-
ENSMUSG00000002221	10271	1133	7.77	888	7.17	1346	7.37	1097	7.77	1349	7.79	1154	7.42	5	27945078	27996689	-	Paxip1	PAX interacting (with transcription-activation domain) protein 1 [Source:MGI Symbol%3BAcc:MGI:1890430]	GO:0043542:endothelial cell migration;GO:0045830:positive regulation of isotype switching;GO:0031398:positive regulation of protein ubiquitination;GO:0060261:positive regulation of transcription initiation from RNA polymerase II promoter;GO:0051571:positive regulation of histone H3-K4 methylation;GO:0000416:positive regulation of histone H3-K36 methylation;GO:0060612:adipose tissue development;GO…	GO:0035097:histone methyltransferase complex;	GO:0005515:protein binding;	K14972	-
ENSMUSG00000002222	6783	1014	10.53	1002	12.26	1235	10.23	1063	11.4	1237	10.82	1099	10.7	6	71365618	71417621	-	Rmnd5a	required for meiotic nuclear division 5 homolog A [Source:MGI Symbol%3BAcc:MGI:1915727]	-	-	-	-	-
ENSMUSG00000002227	5607	1593	20.01	1352	20.01	1882	18.87	1302	16.89	1571	16.62	1356	15.97	3	104702152	104725879	-	Mov10	Mov10 RISC complex RNA helicase [Source:MGI Symbol%3BAcc:MGI:97054]	GO:0035279:mRNA cleavage involved in gene silencing by miRNA;	GO:0000932:cytoplasmic mRNA processing body;	GO:0003723:RNA binding;GO:0005524:ATP binding;GO:0004386:helicase activity;	K18422	-
ENSMUSG00000002228	1814	51	1.98	37	1.69	66	2.05	54	2.16	51	1.67	53	1.93	3	104688372	104693334	+	Ppm1j	protein phosphatase 1J [Source:MGI Symbol%3BAcc:MGI:1919137]	GO:0006470:protein dephosphorylation;	-	GO:0004722:protein serine/threonine phosphatase activity;GO:0005515:protein binding;	K17504	-
ENSMUSG00000002233	1618	380	16.54	355	18.21	450	15.63	557	25.03	656	24.04	589	24.05	3	104695691	104701775	+	Rhoc	ras homolog family member C [Source:MGI Symbol%3BAcc:MGI:106028]	GO:0007411:axon guidance;GO:0043297:apical junction assembly;GO:0043123:positive regulation of I-kappaB kinase/NF-kappaB signaling;GO:0051056:regulation of small GTPase mediated signal transduction;	GO:0005829:cytosol;GO:0032154:cleavage furrow;GO:0005634:nucleus;GO:0005886:plasma membrane;	GO:0004871:signal transducer activity;GO:0005515:protein binding;GO:0005525:GTP binding;	K07857	-
ENSMUSG00000002240	1337	0	0	0	0	0	0	0	0	0	0	0	0	5	87973545	87994246	+	Prr27	proline rich 27 [Source:MGI Symbol%3BAcc:MGI:1921029]	-	-	-	-	-
ENSMUSG00000002249	6714	0	0	0	0	1	0.01	0	0	0	0	0	0	17	28550645	28569791	-	Tead3	TEA domain family member 3 [Source:MGI Symbol%3BAcc:MGI:109241]	GO:0045944:positive regulation of transcription from RNA polymerase II promoter;GO:0035329:hippo signaling;	GO:0005667:transcription factor complex;	GO:0003677:DNA binding;GO:0003700:sequence-specific DNA binding transcription factor activity;	K09448	;ko04011 MAPK signaling pathway - yeast;ko04390 Hippo signaling pathway;ko04391 Hippo signaling pathway - fly;ko04392 Hippo signaling pathway - multiple species;
ENSMUSG00000002250	7514	251	2.35	210	2.32	335	2.51	285	2.76	387	3.05	305	2.68	17	28451674	28520448	+	Ppard	peroxisome proliferator activator receptor delta [Source:MGI Symbol%3BAcc:MGI:101884]	GO:0043401:steroid hormone mediated signaling pathway;GO:0030522:intracellular receptor signaling pathway;GO:0006355:regulation of transcription, DNA-templated;GO:0048662:negative regulation of smooth muscle cell proliferation;GO:0032024:positive regulation of insulin secretion;GO:0050728:negative regulation of inflammatory response;GO:0008654:phospholipid biosynthetic process;GO:0042640:anagen;G…	GO:0005634:nucleus;	GO:0008270:zinc ion binding;GO:0043565:sequence-specific DNA binding;GO:0003707:steroid hormone receptor activity;GO:0004879:ligand-activated sequence-specific DNA binding RNA polymerase II transcription factor activity;GO:0070539:linoleic acid binding;GO:0016501:prostacyclin receptor activity;GO:0008144:drug binding;GO:0046965:retinoid X receptor binding;GO:0003713:transcription coactivator acti…	K04504	;ko03320 PPAR signaling pathway;ko04310 Wnt signaling pathway;ko05200 Pathways in cancer;ko05221 Acute myeloid leukemia;
ENSMUSG00000002257	2672	431	11.36	364	11.31	556	11.7	430	11.7	532	11.81	444	10.98	17	28426752	28447582	+	Def6	differentially expressed in FDCP 6 [Source:MGI Symbol%3BAcc:MGI:1346328]	-	GO:0005737:cytoplasm;GO:0005634:nucleus;GO:0005886:plasma membrane;	GO:0005543:phospholipid binding;GO:0005515:protein binding;	-	-
ENSMUSG00000002265	13616	0	0	0	0	8	0.03	2	0.01	0	0	0	0	7	6706891	6733430	-	Peg3	paternally expressed 3 [Source:MGI Symbol%3BAcc:MGI:104748]	GO:0035264:multicellular organism growth;GO:0010468:regulation of gene expression;GO:0001701:in utero embryonic development;GO:0071514:genetic imprinting;	GO:0005622:intracellular;	GO:0005488:binding;	K09230	-
ENSMUSG00000002266	8086	0	0	0	0	1	0.01	0	0	0	0	0	0	7	6674268	6699449	-	Zim1	zinc finger%2C imprinted 1 [Source:MGI Symbol%3BAcc:MGI:1341879]	-	-	-	K09228	;ko05168 Herpes simplex virus 1 infection;
ENSMUSG00000002274	3771	461	8.61	419	9.22	625	9.32	397	7.66	417	6.56	430	7.53	17	26012195	26016110	-	Metrn	meteorin%2C glial cell differentiation regulator [Source:MGI Symbol%3BAcc:MGI:1917333]	GO:0050772:positive regulation of axonogenesis;GO:0010001:glial cell differentiation;	GO:0005615:extracellular space;	-	-	-
ENSMUSG00000002279	13589	370	1.92	320	1.95	497	2.06	394	2.11	436	1.9	417	2.03	17	25798059	25881800	+	Lmf1	lipase maturation factor 1 [Source:MGI Symbol%3BAcc:MGI:1923733]	GO:0051006:positive regulation of lipoprotein lipase activity;GO:0009306:protein secretion;GO:0033578:protein glycosylation in Golgi;GO:0090181:regulation of cholesterol metabolic process;GO:0051604:protein maturation;GO:0034382:chylomicron remnant clearance;GO:0006888:ER to Golgi vesicle-mediated transport;GO:0090207:regulation of triglyceride metabolic process;	GO:0016021:integral component of membrane;GO:0005789:endoplasmic reticulum membrane;	GO:0005515:protein binding;	-	-
ENSMUSG00000002280	6223	455	5.15	335	4.47	570	5.15	402	4.7	572	5.45	555	5.89	17	25992750	26002306	+	Ciao3	cytosolic iron-sulfur assembly component 3 [Source:MGI Symbol%3BAcc:MGI:1914813]	GO:0001666:response to hypoxia;GO:0016226:iron-sulfur cluster assembly;GO:0006355:regulation of transcription, DNA-templated;GO:0032364:oxygen homeostasis;	GO:0097361:CIA complex;	GO:0046872:metal ion binding;GO:0051539:4 iron, 4 sulfur cluster binding;	K01069	;ko00620 Pyruvate metabolism;ko01100 Metabolic pathways;
ENSMUSG00000002289	3541	96	1.91	72	1.69	123	1.95	114	2.34	122	2.04	98	1.83	17	33992724	34000804	-	Angptl4	angiopoietin-like 4 [Source:MGI Symbol%3BAcc:MGI:1888999]	GO:0001666:response to hypoxia;GO:0001525:angiogenesis;GO:0009267:cellular response to starvation;GO:0051260:protein homooligomerization;GO:0070328:triglyceride homeostasis;GO:0051005:negative regulation of lipoprotein lipase activity;GO:0030154:cell differentiation;GO:0045834:positive regulation of lipid metabolic process;GO:0043066:negative regulation of apoptotic process;	GO:0005615:extracellular space;GO:0005578:proteinaceous extracellular matrix;	GO:0004857:enzyme inhibitor activity;	K08767	;ko03320 PPAR signaling pathway;ko04979 Cholesterol metabolism;
ENSMUSG00000002297	8728	1840	14.85	1454	13.82	2250	14.49	1838	15.31	2149	14.6	1948	14.74	5	8446973	8472716	-	Dbf4	DBF4 zinc finger [Source:MGI Symbol%3BAcc:MGI:1351328]	GO:0006468:protein phosphorylation;GO:0007089:traversing start control point of mitotic cell cycle;GO:0006260:DNA replication;	GO:0005634:nucleus;	GO:0008270:zinc ion binding;GO:0003676:nucleic acid binding;GO:0004674:protein serine/threonine kinase activity;	K06629	;ko04110 Cell cycle;
ENSMUSG00000002307	3151	871	19.47	685	18.04	1000	17.84	779	17.98	910	17.13	847	17.76	17	34128388	34134564	+	Daxx	Fas death domain-associated protein [Source:MGI Symbol%3BAcc:MGI:1197015]	GO:0031396:regulation of protein ubiquitination;GO:0030521:androgen receptor signaling pathway;GO:0045892:negative regulation of transcription, DNA-templated;GO:0000281:mitotic cytokinesis;	GO:0043005:neuron projection;GO:0016605:PML body;GO:0044297:cell body;GO:0005829:cytosol;GO:0000792:heterochromatin;GO:0005938:cell cortex;	GO:0002039:p53 binding;GO:0003714:transcription corepressor activity;GO:0047485:protein N-terminus binding;GO:0031625:ubiquitin protein ligase binding;GO:0003713:transcription coactivator activity;GO:0042803:protein homodimerization activity;GO:0008134:transcription factor binding;GO:0050681:androgen receptor binding;	K02308	;ko04010 MAPK signaling pathway;ko04210 Apoptosis;ko05012 Parkinson disease;ko05014 Amyotrophic lateral sclerosis;ko05022 Pathways of neurodegeneration - multiple diseases;ko05168 Herpes simplex virus 1 infection;
ENSMUSG00000002308	2883	429	10.48	366	10.54	597	11.64	355	8.95	484	9.96	425	9.74	17	34062065	34068748	+	Cd320	CD320 antigen [Source:MGI Symbol%3BAcc:MGI:1860083]	-	GO:0016021:integral component of membrane;GO:0005886:plasma membrane;	GO:0031419:cobalamin binding;GO:0008083:growth factor activity;	K06734	-
ENSMUSG00000002319	4669	769	11.6	609	10.82	973	11.71	575	8.96	813	10.33	723	10.23	14	55862857	55873414	-	Ipo4	importin 4 [Source:MGI Symbol%3BAcc:MGI:1923001]	GO:0006886:intracellular protein transport;GO:0042254:ribosome biogenesis;GO:0006610:ribosomal protein import into nucleus;	GO:0005643:nuclear pore;GO:0005737:cytoplasm;	GO:0008565:protein transporter activity;GO:0005515:protein binding;	-	-
ENSMUSG00000002320	3880	1272	23.09	1084	23.18	1531	22.18	1257	23.56	1431	21.87	1332	22.68	14	55873422	55881263	-	Tm9sf1	transmembrane 9 superfamily member 1 [Source:MGI Symbol%3BAcc:MGI:1921390]	GO:0006914:autophagy;GO:0015031:protein transport;	GO:0016021:integral component of membrane;GO:0000421:autophagosome membrane;GO:0005765:lysosomal membrane;GO:0031410:cytoplasmic vesicle;GO:0005764:lysosome;	-	K17085	-
ENSMUSG00000002324	2935	0	0	0	0	0	0	0	0	0	0	0	0	14	55855494	55862852	+	Rec8	REC8 meiotic recombination protein [Source:MGI Symbol%3BAcc:MGI:1929645]	GO:0001556:oocyte maturation;GO:0007141:male meiosis I;GO:0007059:chromosome segregation;GO:0007286:spermatid development;GO:0007129:synapsis;	GO:0001673:male germ cell nucleus;GO:0034991:nuclear meiotic cohesin complex;GO:0000778:condensed nuclear chromosome kinetochore;GO:0000800:lateral element;	GO:0005515:protein binding;	K13054	;ko04114 Oocyte meiosis;
ENSMUSG00000002325	5386	860	11.25	740	11.4	1118	11.67	772	10.42	968	10.66	867	10.63	14	55841028	55847487	+	Irf9	interferon regulatory factor 9 [Source:MGI Symbol%3BAcc:MGI:107587]	GO:0006355:regulation of transcription, DNA-templated;GO:0045351:type I interferon biosynthetic process;	GO:0005634:nucleus;	GO:0000975:regulatory region DNA binding;GO:0005515:protein binding;GO:0003700:sequence-specific DNA binding transcription factor activity;	K04693	;ko04217 Necroptosis;ko04380 Osteoclast differentiation;ko04621 NOD-like receptor signaling pathway;ko04625 C-type lectin receptor signaling pathway;ko04630 JAK-STAT signaling pathway;ko05160 Hepatitis C;ko05162 Measles;ko05164 Influenza A;ko05165 Human papillomavirus infection;ko05167 Kaposi sarcoma-associated herpesvirus infection;ko05168 Herpes simplex virus 1 infection;ko05169 Epstein-Barr vi…
ENSMUSG00000002326	3925	274	4.92	230	4.86	357	5.11	256	4.74	304	4.59	292	4.91	14	55909398	55916657	+	Gmpr2	guanosine monophosphate reductase 2 [Source:MGI Symbol%3BAcc:MGI:1917903]	GO:0055114:oxidation-reduction process;GO:0030224:monocyte differentiation;GO:0046038:GMP catabolic process;	-	GO:0046872:metal ion binding;GO:0003920:GMP reductase activity;	K00364	;ko00230 Purine metabolism;ko01100 Metabolic pathways;
ENSMUSG00000002329	2032	200	6.93	183	7.47	265	7.33	249	8.91	281	8.2	235	7.64	14	55895336	55897965	-	Mdp1	magnesium-dependent phosphatase 1 [Source:MGI Symbol%3BAcc:MGI:1915131]	GO:0016311:dephosphorylation;GO:0030389:fructosamine metabolic process;	-	GO:0004725:protein tyrosine phosphatase activity;GO:0046872:metal ion binding;	K17619	-
ENSMUSG00000002332	2760	341	8.7	246	7.4	473	9.63	344	9.06	389	8.36	362	8.66	14	55976477	55983147	-	Dhrs1	dehydrogenase/reductase (SDR family) member 1 [Source:MGI Symbol%3BAcc:MGI:1196314]	GO:0055114:oxidation-reduction process;	GO:0005743:mitochondrial inner membrane;	GO:0016491:oxidoreductase activity;GO:0000166:nucleotide binding;	K11163	-
ENSMUSG00000002341	7195	0	0	0	0	0	0	1	0.01	0	0	0	0	8	70545735	70573523	-	Ncan	neurocan [Source:MGI Symbol%3BAcc:MGI:104694]	GO:0051823:regulation of synapse structural plasticity;GO:0007155:cell adhesion;	GO:0005886:plasma membrane;GO:0005576:extracellular region;	GO:0005540:hyaluronic acid binding;GO:0030246:carbohydrate binding;GO:0005509:calcium ion binding;	K06794	-
ENSMUSG00000002342	3673	408	7.82	335	7.57	506	7.74	377	7.46	468	7.56	387	6.96	8	70625006	70636331	+	Tmem161a	transmembrane protein 161A [Source:MGI Symbol%3BAcc:MGI:2384577]	GO:0045739:positive regulation of DNA repair;GO:0034599:cellular response to oxidative stress;GO:0034644:cellular response to UV;GO:0032526:response to retinoic acid;GO:0043066:negative regulation of apoptotic process;GO:0033554:cellular response to stress;GO:0042221:response to chemical;GO:0050794:regulation of cellular process;	GO:0016020:membrane;GO:0016021:integral component of membrane;	-	-	-
ENSMUSG00000002343	3262	272	5.87	262	6.67	402	6.93	348	7.76	376	6.84	367	7.43	8	70672822	70687116	-	Armc6	armadillo repeat containing 6 [Source:MGI Symbol%3BAcc:MGI:1924063]	-	-	-	-	-
ENSMUSG00000002345	1468	196	9.4	174	9.84	271	10.38	202	10.01	227	9.17	218	9.81	8	70592149	70599969	+	Borcs8	BLOC-1 related complex subunit 8 [Source:MGI Symbol%3BAcc:MGI:1919618]	GO:0007507:heart development;	-	-	-	-
ENSMUSG00000002346	5996	33	0.39	35	0.48	53	0.5	21	0.25	38	0.38	39	0.43	8	70636990	70664955	-	Slc25a42	solute carrier family 25%2C member 42 [Source:MGI Symbol%3BAcc:MGI:1920345]	GO:0035349:coenzyme A transmembrane transport;GO:0015867:ATP transport;GO:0015866:ADP transport;GO:0080121:AMP transport;	GO:0016021:integral component of membrane;GO:0005743:mitochondrial inner membrane;	GO:0080122:AMP transmembrane transporter activity;GO:0015217:ADP transmembrane transporter activity;GO:0043262:adenosine-diphosphatase activity;GO:0015228:coenzyme A transmembrane transporter activity;GO:0005347:ATP transmembrane transporter activity;	K15085	-
ENSMUSG00000002365	3617	5064	98.61	4421	101.43	6579	102.24	4514	90.75	5066	83.06	4826	88.13	17	5891604	5982229	+	Snx9	sorting nexin 9 [Source:MGI Symbol%3BAcc:MGI:1913866]	GO:0006898:receptor-mediated endocytosis;GO:0060988:lipid tube assembly;GO:0006886:intracellular protein transport;GO:0007154:cell communication;GO:0043547:positive regulation of GTPase activity;GO:0032461:positive regulation of protein oligomerization;	GO:0005802:trans-Golgi network;GO:0030659:cytoplasmic vesicle membrane;GO:0031234:extrinsic component of cytoplasmic side of plasma membrane;GO:0005794:Golgi apparatus;GO:0042995:cell projection;	GO:0005545:1-phosphatidylinositol binding;GO:0031625:ubiquitin protein ligase binding;GO:0042803:protein homodimerization activity;	K17923	;ko05132 Salmonella infection;
ENSMUSG00000002372	6960	1680	17	1453	17.32	2184	17.64	1581	16.52	1975	16.83	1746	16.57	17	56980294	57018764	+	Ranbp3	RAN binding protein 3 [Source:MGI Symbol%3BAcc:MGI:1919060]	GO:0015031:protein transport;GO:0046907:intracellular transport;	GO:0005737:cytoplasm;GO:0005634:nucleus;	GO:0070412:R-SMAD binding;	K15304	;ko05166 Human T-cell leukemia virus 1 infection;
ENSMUSG00000002379	1092	428	27.61	450	34.2	644	33.15	391	26.04	533	28.95	472	28.55	17	57024767	57029141	+	Ndufa11	NADH:ubiquinone oxidoreductase subunit A11 [Source:MGI Symbol%3BAcc:MGI:1917125]	GO:0006810:transport;GO:0022900:electron transport chain;	GO:0005747:mitochondrial respiratory chain complex I;GO:0016021:integral component of membrane;	-	K03956	;ko00190 Oxidative phosphorylation;ko01100 Metabolic pathways;ko04714 Thermogenesis;ko04723 Retrograde endocannabinoid signaling;ko04932 Non-alcoholic fatty liver disease;ko05010 Alzheimer disease;ko05012 Parkinson disease;ko05014 Amyotrophic lateral sclerosis;ko05016 Huntington disease;ko05020 Prion disease;ko05022 Pathways of neurodegeneration - multiple diseases;
ENSMUSG00000002384	3880	0	0	1	0.02	1	0.01	0	0	2	0.03	0	0	4	122998958	123025892	+	Bmp8b	bone morphogenetic protein 8b [Source:MGI Symbol%3BAcc:MGI:107335]	GO:0007283:spermatogenesis;GO:0030154:cell differentiation;GO:0001503:ossification;GO:0040007:growth;GO:0051216:cartilage development;GO:0007179:transforming growth factor beta receptor signaling pathway;	GO:0005615:extracellular space;	GO:0008083:growth factor activity;GO:0005125:cytokine activity;	K16622	;ko04060 Cytokine-cytokine receptor interaction;ko04350 TGF-beta signaling pathway;ko04390 Hippo signaling pathway;ko04714 Thermogenesis;
ENSMUSG00000002393	2983	278	6.56	193	5.37	323	6.09	241	5.87	316	6.28	279	6.18	8	71826767	71834604	-	Nr2f6	nuclear receptor subfamily 2%2C group F%2C member 6 [Source:MGI Symbol%3BAcc:MGI:1352453]	GO:0048666:neuron development;GO:0000122:negative regulation of transcription from RNA polymerase II promoter;GO:0050965:detection of temperature stimulus involved in sensory perception of pain;GO:0043401:steroid hormone mediated signaling pathway;GO:0043153:entrainment of circadian clock by photoperiod;	GO:0005634:nucleus;	GO:0005515:protein binding;GO:0008270:zinc ion binding;GO:0003707:steroid hormone receptor activity;GO:0004879:ligand-activated sequence-specific DNA binding RNA polymerase II transcription factor activity;GO:0043565:sequence-specific DNA binding;	K08549	-
ENSMUSG00000002395	2203	569	18.19	455	17.14	736	18.78	630	20.79	598	16.1	570	17.09	8	71819492	71822376	+	Use1	unconventional SNARE in the ER 1 homolog (S. cerevisiae) [Source:MGI Symbol%3BAcc:MGI:1914273]	GO:0060628:regulation of ER to Golgi vesicle-mediated transport;GO:0071786:endoplasmic reticulum tubular network organization;GO:0015031:protein transport;	GO:0016021:integral component of membrane;GO:0005783:endoplasmic reticulum;	-	K08507	;ko04130 SNARE interactions in vesicular transport;
ENSMUSG00000002396	7133	188	1.86	136	1.58	274	2.16	225	2.29	215	1.79	196	1.82	8	71823942	71832005	+	Ocel1	occludin/ELL domain containing 1 [Source:MGI Symbol%3BAcc:MGI:1924340]	GO:0048666:neuron development;GO:0000122:negative regulation of transcription from RNA polymerase II promoter;GO:0050965:detection of temperature stimulus involved in sensory perception of pain;GO:0043153:entrainment of circadian clock by photoperiod;	GO:0005634:nucleus;	GO:0005515:protein binding;GO:0038023:signaling receptor activity;GO:0046872:metal ion binding;GO:0043565:sequence-specific DNA binding;GO:0003700:sequence-specific DNA binding transcription factor activity;	K08549	-
ENSMUSG00000002409	2695	29	0.76	13	0.4	26	0.54	25	0.67	22	0.48	29	0.71	7	27878894	27886719	+	Dyrk1b	dual-specificity tyrosine-(Y)-phosphorylation regulated kinase 1b [Source:MGI Symbol%3BAcc:MGI:1330302]	GO:0006468:protein phosphorylation;GO:0007520:myoblast fusion;GO:0045893:positive regulation of transcription, DNA-templated;	-	GO:0004672:protein kinase activity;GO:0000166:nucleotide binding;GO:0003713:transcription coactivator activity;	K08825	-
ENSMUSG00000002413	13862	1077	5.47	872	5.22	1218	4.94	964	5.06	1329	5.69	1086	5.18	6	39580171	39702397	-	Braf	Braf transforming gene [Source:MGI Symbol%3BAcc:MGI:88190]	GO:0071277:cellular response to calcium ion;GO:0051291:protein heterooligomerization;GO:0010628:positive regulation of gene expression;GO:0070374:positive regulation of ERK1 and ERK2 cascade;GO:0033138:positive regulation of peptidyl-serine phosphorylation;GO:0043434:response to peptide hormone;GO:0051591:response to cAMP;GO:0043524:negative regulation of neuron apoptotic process;GO:0070849:respo…	GO:0043005:neuron projection;GO:0005737:cytoplasm;GO:0005886:plasma membrane;GO:0005634:nucleus;	GO:0031434:mitogen-activated protein kinase kinase binding;GO:0005509:calcium ion binding;GO:0046982:protein heterodimerization activity;GO:0004709:MAP kinase kinase kinase activity;GO:0005524:ATP binding;	K04365	;ko01521 EGFR tyrosine kinase inhibitor resistance;ko01522 Endocrine resistance;ko04010 MAPK signaling pathway;ko04012 ErbB signaling pathway;ko04013 MAPK signaling pathway - fly;ko04015 Rap1 signaling pathway;ko04024 cAMP signaling pathway;ko04062 Chemokine signaling pathway;ko04068 FoxO signaling pathway;ko04150 mTOR signaling pathway;ko04214 Apoptosis - fly;ko04270 Vascular smooth muscle contr…
ENSMUSG00000002416	5628	231	2.89	183	2.7	313	3.13	241	3.11	280	2.95	228	2.68	6	39569508	39580316	+	Ndufb2	NADH:ubiquinone oxidoreductase subunit B2 [Source:MGI Symbol%3BAcc:MGI:1915448]	GO:0006810:transport;GO:0022900:electron transport chain;	GO:0005747:mitochondrial respiratory chain complex I;	-	K03958	;ko00190 Oxidative phosphorylation;ko01100 Metabolic pathways;ko04714 Thermogenesis;ko04723 Retrograde endocannabinoid signaling;ko04932 Non-alcoholic fatty liver disease;ko05010 Alzheimer disease;ko05012 Parkinson disease;ko05014 Amyotrophic lateral sclerosis;ko05016 Huntington disease;ko05020 Prion disease;ko05022 Pathways of neurodegeneration - multiple diseases;
ENSMUSG00000002428	5931	1169	13.88	949	13.28	1478	14.01	1120	13.73	1385	13.85	1226	13.65	3	20111975	20172654	+	Hltf	helicase-like transcription factor [Source:MGI Symbol%3BAcc:MGI:1196437]	GO:0006357:regulation of transcription from RNA polymerase II promoter;GO:0016568:chromatin modification;	GO:0005634:nucleus;	GO:0008270:zinc ion binding;GO:0016874:ligase activity;GO:0004386:helicase activity;GO:0003677:DNA binding;GO:0016887:ATPase activity;GO:0005524:ATP binding;	K15711	-
ENSMUSG00000002455	3859	1375	25.1	1181	25.4	1778	25.9	1391	26.21	1693	26.02	1470	25.16	2	181233661	181297453	+	Prpf6	pre-mRNA splicing factor 6 [Source:MGI Symbol%3BAcc:MGI:1922946]	-	-	-	K12855	;ko03040 Spliceosome;
ENSMUSG00000002458	2230	1116	35.25	952	35.43	1422	35.84	1017	33.16	1294	34.41	1214	35.96	2	181330212	181335770	-	Rgs19	regulator of G-protein signaling 19 [Source:MGI Symbol%3BAcc:MGI:1915153]	GO:0043547:positive regulation of GTPase activity;GO:0038032:termination of G-protein coupled receptor signaling pathway;GO:0007264:small GTPase mediated signal transduction;GO:0006914:autophagy;	GO:0000139:Golgi membrane;GO:0044445:cytosolic part;GO:0005903:brush border;GO:0030136:clathrin-coated vesicle;GO:0005886:plasma membrane;GO:0005834:heterotrimeric G-protein complex;GO:0005794:Golgi apparatus;	GO:0001965:G-protein alpha-subunit binding;GO:0005096:GTPase activator activity;	K16449	-
ENSMUSG00000002459	4239	0	0	0	0	0	0	0	0	0	0	1	0.02	1	4979799	5140508	-	Rgs20	regulator of G-protein signaling 20 [Source:MGI Symbol%3BAcc:MGI:1929866]	GO:0038032:termination of G-protein coupled receptor signaling pathway;GO:0043547:positive regulation of GTPase activity;	GO:0005794:Golgi apparatus;GO:0005634:nucleus;GO:0005886:plasma membrane;	GO:0005096:GTPase activator activity;	K16449	-
ENSMUSG00000002475	2334	0	0	0	0	0	0	2	0.06	2	0.05	0	0	18	10642092	10706771	-	Abhd3	abhydrolase domain containing 3 [Source:MGI Symbol%3BAcc:MGI:2147183]	-	GO:0016021:integral component of membrane;	-	K13696	-
ENSMUSG00000002477	2052	2188	75.1	1929	78.01	2902	79.49	2033	72.04	2301	66.5	2395	77.1	18	10617775	10642079	+	Snrpd1	small nuclear ribonucleoprotein D1 [Source:MGI Symbol%3BAcc:MGI:98344]	-	-	-	K11087	;ko03040 Spliceosome;ko05322 Systemic lupus erythematosus;
ENSMUSG00000002486	7397	196	1.87	137	1.54	218	1.66	216	2.12	227	1.82	192	1.71	5	114845821	114860388	+	Tchp	trichoplein%2C keratin filament binding [Source:MGI Symbol%3BAcc:MGI:1925082]	GO:0044763:single-organism cellular process;GO:0030308:negative regulation of cell growth;GO:0006915:apoptotic process;	GO:0044444:cytoplasmic part;GO:0044430:cytoskeletal part;GO:0016020:membrane;GO:0071944:cell periphery;GO:0005886:plasma membrane;GO:0045179:apical cortex;GO:0005813:centrosome;GO:0005739:mitochondrion;GO:0045095:keratin filament;	-	K16811	-
ENSMUSG00000002489	10048	151	1.06	103	0.85	189	1.06	106	0.77	158	0.93	131	0.86	16	89583999	89940657	-	Tiam1	T cell lymphoma invasion and metastasis 1 [Source:MGI Symbol%3BAcc:MGI:103306]	GO:0031547:brain-derived neurotrophic factor receptor signaling pathway;GO:0048013:ephrin receptor signaling pathway;GO:0050772:positive regulation of axonogenesis;GO:0010976:positive regulation of neuron projection development;	GO:0005911:cell-cell junction;GO:0005622:intracellular;GO:0005886:plasma membrane;	GO:0005057:receptor signaling protein activity;GO:0030971:receptor tyrosine kinase binding;GO:0046875:ephrin receptor binding;GO:0005543:phospholipid binding;GO:0005089:Rho guanyl-nucleotide exchange factor activity;	K05731	;ko04014 Ras signaling pathway;ko04015 Rap1 signaling pathway;ko04024 cAMP signaling pathway;ko04062 Chemokine signaling pathway;ko04530 Tight junction;ko04810 Regulation of actin cytoskeleton;ko05205 Proteoglycans in cancer;
ENSMUSG00000002496	9620	904	6.62	736	6.35	1087	6.35	913	6.9	1088	6.71	977	6.71	17	24814790	24851604	-	Tsc2	TSC complex subunit 2 [Source:MGI Symbol%3BAcc:MGI:102548]	GO:0001843:neural tube closure;GO:0014067:negative regulation of phosphatidylinositol 3-kinase signaling;GO:0050918:positive chemotaxis;GO:0050680:negative regulation of epithelial cell proliferation;GO:0032007:negative regulation of TOR signaling;GO:0007507:heart development;GO:0043547:positive regulation of GTPase activity;GO:0051726:regulation of cell cycle;GO:0006953:acute-phase response;GO:0…	GO:0005901:caveola;GO:0030426:growth cone;GO:0044430:cytoskeletal part;GO:0033596:TSC1-TSC2 complex;GO:0048471:perinuclear region of cytoplasm;GO:0005794:Golgi apparatus;GO:0030425:dendrite;GO:0005634:nucleus;GO:0043025:neuronal cell body;	GO:0042803:protein homodimerization activity;GO:0019902:phosphatase binding;GO:0046982:protein heterodimerization activity;GO:0005096:GTPase activator activity;GO:0071889:14-3-3 protein binding;	K07207	;ko04072 Phospholipase D signaling pathway;ko04115 p53 signaling pathway;ko04140 Autophagy - animal;ko04150 mTOR signaling pathway;ko04151 PI3K-Akt signaling pathway;ko04152 AMPK signaling pathway;ko04211 Longevity regulating pathway;ko04218 Cellular senescence;ko04714 Thermogenesis;ko04910 Insulin signaling pathway;ko04919 Thyroid hormone signaling pathway;ko05163 Human cytomegalovirus infection…
ENSMUSG00000002500	1643	3	0.13	2	0.1	1	0.03	0	0	0	0	8	0.32	17	24946794	24955117	+	Rpl3l	ribosomal protein L3-like [Source:MGI Symbol%3BAcc:MGI:1913461]	GO:0006412:translation;	GO:0022625:cytosolic large ribosomal subunit;	GO:0003735:structural constituent of ribosome;	K02925	;ko03010 Ribosome;ko05171 Coronavirus disease - COVID-19;
ENSMUSG00000002504	2646	165	4.39	123	3.86	198	4.21	112	3.08	163	3.65	115	2.87	17	24858260	24869301	-	Slc9a3r2	solute carrier family 9 (sodium/hydrogen exchanger)%2C member 3 regulator 2 [Source:MGI Symbol%3BAcc:MGI:1890662]	GO:0014067:negative regulation of phosphatidylinositol 3-kinase signaling;GO:0045838:positive regulation of membrane potential;	GO:0043234:protein complex;GO:0016324:apical plasma membrane;GO:0005737:cytoplasm;GO:0005634:nucleus;	GO:0008013:beta-catenin binding;GO:0032947:protein complex scaffold;GO:0008022:protein C-terminus binding;GO:0019902:phosphatase binding;GO:0030165:PDZ domain binding;GO:0016247:channel regulator activity;GO:0050750:low-density lipoprotein particle receptor binding;	K13358	;ko04960 Aldosterone-regulated sodium reabsorption;
ENSMUSG00000002524	4748	1914	28.39	1618	28.28	2548	30.17	1790	27.41	2029	25.34	1966	27.35	15	75942031	75952773	-	Puf60	poly-U binding splicing factor 60 [Source:MGI Symbol%3BAcc:MGI:1915209]	GO:0006915:apoptotic process;GO:0006355:regulation of transcription, DNA-templated;GO:0008380:RNA splicing;GO:0006397:mRNA processing;	GO:0005730:nucleolus;GO:0019907:cyclin-dependent protein kinase activating kinase holoenzyme complex;GO:0030529:ribonucleoprotein complex;	GO:0003723:RNA binding;GO:0003677:DNA binding;GO:0000166:nucleotide binding;	K12838	;ko03040 Spliceosome;
ENSMUSG00000002546	5500	928	11.88	795	12	1016	10.38	837	11.07	1057	11.4	873	10.48	2	32177396	32197933	+	Golga2	golgi autoantigen%2C golgin subfamily a%2C 2 [Source:MGI Symbol%3BAcc:MGI:2139395]	GO:0051645:Golgi localization;GO:0050772:positive regulation of axonogenesis;	GO:0043234:protein complex;GO:0043025:neuronal cell body;GO:0005801:cis-Golgi network;GO:0000137:Golgi cis cisterna;GO:0016020:membrane;	GO:0032403:protein complex binding;	K10595	;ko04120 Ubiquitin mediated proteolysis;
ENSMUSG00000002550	2751	408	10.45	353	10.65	587	11.99	431	11.39	522	11.25	511	12.27	2	32145014	32150171	-	Uck1	uridine-cytidine kinase 1 [Source:MGI Symbol%3BAcc:MGI:98904]	GO:0044211:CTP salvage;GO:0044206:UMP salvage;GO:0016310:phosphorylation;	-	GO:0004849:uridine kinase activity;GO:0016773:phosphotransferase activity, alcohol group as acceptor;GO:0005524:ATP binding;	K00876	;ko00240 Pyrimidine metabolism;ko00983 Drug metabolism - other enzymes;ko01100 Metabolic pathways;
ENSMUSG00000002565	2999	1	0.02	0	0	0	0	0	0	0	0	0	0	12	40109768	40184227	-	Scin	scinderin [Source:MGI Symbol%3BAcc:MGI:1306794]	GO:0045654:positive regulation of megakaryocyte differentiation;GO:0043065:positive regulation of apoptotic process;GO:0051014:actin filament severing;GO:0008285:negative regulation of cell proliferation;GO:0051693:actin filament capping;	GO:0043234:protein complex;GO:0005856:cytoskeleton;GO:0005737:cytoplasm;	GO:0003779:actin binding;	K05768	;ko04666 Fc gamma R-mediated phagocytosis;ko04810 Regulation of actin cytoskeleton;ko05203 Viral carcinogenesis;
ENSMUSG00000002578	6461	0	0	0	0	1	0.01	0	0	0	0	0	0	10	128466712	128505227	-	Ikzf4	IKAROS family zinc finger 4 [Source:MGI Symbol%3BAcc:MGI:1343139]	GO:0045892:negative regulation of transcription, DNA-templated;	GO:0005622:intracellular;GO:0005634:nucleus;	GO:0008270:zinc ion binding;GO:0003676:nucleic acid binding;GO:0046982:protein heterodimerization activity;GO:0042803:protein homodimerization activity;GO:0003677:DNA binding;	K09220	-
ENSMUSG00000002580	747	262	24.7	259	28.77	406	30.55	298	29.01	393	31.2	346	30.6	11	98328534	98329817	-	Mien1	migration and invasion enhancer 1 [Source:MGI Symbol%3BAcc:MGI:1913678]	GO:0045454:cell redox homeostasis;GO:0030335:positive regulation of cell migration;GO:0051491:positive regulation of filopodium assembly;GO:0043066:negative regulation of apoptotic process;	GO:0005829:cytosol;GO:0031235:intrinsic component of the cytoplasmic side of the plasma membrane;	GO:0005515:protein binding;GO:0008430:selenium binding;	K07401	-
ENSMUSG00000002588	2898	0	0	0	0	0	0	0	0	0	0	0	0	6	5168090	5193946	-	Pon1	paraoxonase 1 [Source:MGI Symbol%3BAcc:MGI:103295]	GO:0009636:response to toxic substance;GO:0010875:positive regulation of cholesterol efflux;GO:0046395:carboxylic acid catabolic process;GO:0019439:aromatic compound catabolic process;GO:0046470:phosphatidylcholine metabolic process;GO:0051099:positive regulation of binding;GO:0032411:positive regulation of transporter activity;GO:0046434:organophosphate catabolic process;GO:0008015:blood circula…	GO:0043231:intracellular membrane-bounded organelle;GO:0034366:spherical high-density lipoprotein particle;	GO:0004063:aryldialkylphosphatase activity;GO:0005509:calcium ion binding;GO:0005543:phospholipid binding;GO:0004064:arylesterase activity;GO:0008035:high-density lipoprotein particle binding;GO:0042803:protein homodimerization activity;	K01045	-
ENSMUSG00000002602	5033	26	0.36	20	0.33	36	0.4	22	0.32	27	0.32	29	0.38	7	25456698	25488130	-	Axl	AXL receptor tyrosine kinase [Source:MGI Symbol%3BAcc:MGI:1347244]	GO:0006954:inflammatory response;GO:0043524:negative regulation of neuron apoptotic process;GO:0043277:apoptotic cell clearance;GO:0032720:negative regulation of tumor necrosis factor production;GO:0031668:cellular response to extracellular stimulus;GO:0032689:negative regulation of interferon-gamma production;GO:0007283:spermatogenesis;GO:0031100:organ regeneration;GO:0030168:platelet activation…	GO:0009986:cell surface;GO:0005615:extracellular space;GO:0005886:plasma membrane;GO:0016021:integral component of membrane;GO:0016020:membrane;	GO:0043548:phosphatidylinositol 3-kinase binding;GO:0004714:transmembrane receptor protein tyrosine kinase activity;GO:0001786:phosphatidylserine binding;GO:0005524:ATP binding;GO:0019838:growth factor binding;GO:0046982:protein heterodimerization activity;GO:0032036:myosin heavy chain binding;GO:0004713:protein tyrosine kinase activity;GO:0000166:nucleotide binding;	K05115	;ko01521 EGFR tyrosine kinase inhibitor resistance;
ENSMUSG00000002603	5042	2729	38.12	2331	38.37	3447	38.43	2366	34.12	3075	36.17	2636	34.53	7	25386427	25404502	+	Tgfb1	transforming growth factor%2C beta 1 [Source:MGI Symbol%3BAcc:MGI:98725]	GO:0007173:epidermal growth factor receptor signaling pathway;GO:0000060:protein import into nucleus, translocation;GO:0045066:regulatory T cell differentiation;GO:0061035:regulation of cartilage development;GO:0035307:positive regulation of protein dephosphorylation;GO:0007093:mitotic cell cycle checkpoint;GO:0045599:negative regulation of fat cell differentiation;GO:0002244:hematopoietic progen…	GO:0030424:axon;GO:0043025:neuronal cell body;GO:0005902:microvillus;GO:0009986:cell surface;GO:0005578:proteinaceous extracellular matrix;GO:0005634:nucleus;GO:0005615:extracellular space;GO:0030141:secretory granule;	GO:0008083:growth factor activity;GO:0046982:protein heterodimerization activity;GO:0042803:protein homodimerization activity;GO:0019899:enzyme binding;GO:0005114:type II transforming growth factor beta receptor binding;GO:0047485:protein N-terminus binding;	K13375	;ko04010 MAPK signaling pathway;ko04060 Cytokine-cytokine receptor interaction;ko04068 FoxO signaling pathway;ko04110 Cell cycle;ko04218 Cellular senescence;ko04350 TGF-beta signaling pathway;ko04380 Osteoclast differentiation;ko04390 Hippo signaling pathway;ko04659 Th17 cell differentiation;ko04672 Intestinal immune network for IgA production;ko04926 Relaxin signaling pathway;ko04932 Non-alcohol…
ENSMUSG00000002608	3939	622	11.12	481	10.13	756	10.79	569	10.5	705	10.61	595	9.98	7	25410531	25418513	-	Ccdc97	coiled-coil domain containing 97 [Source:MGI Symbol%3BAcc:MGI:1196455]	-	-	-	-	-
ENSMUSG00000002617	4482	80	1.26	68	1.26	119	1.49	96	1.56	114	1.51	94	1.39	17	23392843	23412226	-	Zfp40	zinc finger protein 40 [Source:MGI Symbol%3BAcc:MGI:99185]	GO:0006355:regulation of transcription, DNA-templated;	GO:0005622:intracellular;	GO:0003676:nucleic acid binding;GO:0008270:zinc ion binding;GO:0046872:metal ion binding;	K09228	;ko05168 Herpes simplex virus 1 infection;
ENSMUSG00000002625	5073	412	5.72	340	5.56	487	5.4	357	5.12	468	5.47	406	5.29	17	32540398	32569581	-	Akap8l	A kinase (PRKA) anchor protein 8-like [Source:MGI Symbol%3BAcc:MGI:1860606]	GO:0016310:phosphorylation;	GO:0016363:nuclear matrix;GO:0005737:cytoplasm;	GO:0046872:metal ion binding;GO:0003677:DNA binding;GO:0016301:kinase activity;GO:0008270:zinc ion binding;	K15978	-
ENSMUSG00000002633	2847	0	0	0	0	0	0	0	0	0	0	0	0	5	28661813	28672254	-	Shh	sonic hedgehog [Source:MGI Symbol%3BAcc:MGI:98297]	GO:0060439:trachea morphogenesis;GO:0060523:prostate epithelial cord elongation;GO:0021938:smoothened signaling pathway involved in regulation of cerebellar granule cell precursor cell proliferation;GO:0030901:midbrain development;GO:0048714:positive regulation of oligodendrocyte differentiation;GO:0060783:mesenchymal smoothened signaling pathway involved in prostate gland development;GO:0060685:…	GO:0030424:axon;GO:0043025:neuronal cell body;GO:0005783:endoplasmic reticulum;GO:0009986:cell surface;GO:0005886:plasma membrane;GO:0005794:Golgi apparatus;GO:0005634:nucleus;GO:0045121:membrane raft;GO:0030133:transport vesicle;GO:0005615:extracellular space;GO:0031012:extracellular matrix;GO:0030425:dendrite;	GO:0043237:laminin-1 binding;GO:0008270:zinc ion binding;GO:0005509:calcium ion binding;GO:0005113:patched binding;GO:0001948:glycoprotein binding;GO:0004871:signal transducer activity;GO:0005539:glycosaminoglycan binding;GO:0008233:peptidase activity;	K11988	;ko04340 Hedgehog signaling pathway;ko04360 Axon guidance;ko05200 Pathways in cancer;ko05205 Proteoglycans in cancer;ko05217 Basal cell carcinoma;ko05226 Gastric cancer;
ENSMUSG00000002635	1549	258	11.73	181	9.7	305	11.07	258	12.11	297	11.37	280	11.94	7	33883924	33896086	-	Pdcd2l	programmed cell death 2-like [Source:MGI Symbol%3BAcc:MGI:1915329]	GO:0007049:cell cycle;	GO:0005737:cytoplasm;	-	K14801	-
ENSMUSG00000002658	1717	1312	53.82	1186	57.32	1640	53.69	1291	54.67	1527	52.74	1385	53.28	17	57310405	57318288	-	Gtf2f1	general transcription factor IIF%2C polypeptide 1 [Source:MGI Symbol%3BAcc:MGI:1923848]	GO:0009615:response to virus;GO:0045944:positive regulation of transcription from RNA polymerase II promoter;GO:0043085:positive regulation of catalytic activity;	GO:0030054:cell junction;GO:0005634:nucleus;	GO:0019211:phosphatase activator activity;GO:0008134:transcription factor binding;	K03138	;ko03022 Basal transcription factors;
ENSMUSG00000002660	1223	596	34.32	535	36.3	716	32.91	571	33.95	587	28.46	575	31.06	17	57297305	57303188	+	Clpp	caseinolytic mitochondrial matrix peptidase proteolytic subunit [Source:MGI Symbol%3BAcc:MGI:1858213]	GO:0051260:protein homooligomerization;GO:0006515:misfolded or incompletely synthesized protein catabolic process;	GO:0005739:mitochondrion;	GO:0042802:identical protein binding;GO:0005524:ATP binding;GO:0004252:serine-type endopeptidase activity;	K01358	;ko04112 Cell cycle - Caulobacter;ko04212 Longevity regulating pathway - worm;
ENSMUSG00000002661	1029	104	7.12	64	5.16	133	7.27	107	7.56	127	7.32	120	7.7	17	57304339	57306322	+	Alkbh7	alkB homolog 7 [Source:MGI Symbol%3BAcc:MGI:1913650]	GO:0055114:oxidation-reduction process;	GO:0005576:extracellular region;GO:0005739:mitochondrion;GO:0005634:nucleus;	GO:0046872:metal ion binding;GO:0016702:oxidoreductase activity, acting on single donors with incorporation of molecular oxygen, incorporation of two atoms of oxygen;GO:0016706:oxidoreductase activity, acting on paired donors, with incorporation or reduction of molecular oxygen, 2-oxoglutarate as one donor, and incorporation of one atom each of oxygen into both donors;	K10769	-
ENSMUSG00000002664	474	0	0	0	0	4	0.47	2	0.31	3	0.38	4	0.56	17	57306457	57307018	-	Pspn	persephin [Source:MGI Symbol%3BAcc:MGI:1201684]	GO:0001658:branching involved in ureteric bud morphogenesis;	GO:0005615:extracellular space;	GO:0005102:receptor binding;	-	-
ENSMUSG00000002668	5109	201	2.77	156	2.53	252	2.77	165	2.35	223	2.59	175	2.26	17	57372905	57385514	-	Dennd1c	DENN/MADD domain containing 1C [Source:MGI Symbol%3BAcc:MGI:1918035]	GO:0050790:regulation of catalytic activity;	GO:0031410:cytoplasmic vesicle;	GO:0017112:Rab guanyl-nucleotide exchange factor activity;	-	-
ENSMUSG00000002679	1447	250	12.17	202	11.58	322	12.51	252	12.66	288	11.8	293	13.38	12	81620331	81641782	-	Med6	mediator complex subunit 6 [Source:MGI Symbol%3BAcc:MGI:1917042]	GO:0045944:positive regulation of transcription from RNA polymerase II promoter;GO:0019827:stem cell maintenance;	GO:0016592:mediator complex;	GO:0003677:DNA binding;GO:0001104:RNA polymerase II transcription cofactor activity;GO:0008134:transcription factor binding;GO:0003713:transcription coactivator activity;	K15128	-
ENSMUSG00000002688	3653	0	0	0	0	0	0	0	0	0	0	0	0	12	50388014	50695881	-	Prkd1	protein kinase D1 [Source:MGI Symbol%3BAcc:MGI:99879]	GO:0006954:inflammatory response;GO:0033138:positive regulation of peptidyl-serine phosphorylation;GO:0043123:positive regulation of I-kappaB kinase/NF-kappaB signaling;GO:0006915:apoptotic process;GO:0010837:regulation of keratinocyte proliferation;GO:0045669:positive regulation of osteoblast differentiation;GO:0045766:positive regulation of angiogenesis;GO:1901727:positive regulation of histone…	GO:0005802:trans-Golgi network;GO:0005829:cytosol;GO:0005886:plasma membrane;GO:0005911:cell-cell junction;GO:0005794:Golgi apparatus;GO:0005634:nucleus;GO:0005938:cell cortex;	GO:0005543:phospholipid binding;GO:0046872:metal ion binding;GO:0004697:protein kinase C activity;GO:0042802:identical protein binding;GO:0005524:ATP binding;	K06070	;ko04015 Rap1 signaling pathway;ko04925 Aldosterone synthesis and secretion;
ENSMUSG00000002699	4459	2559	40.42	1942	36.14	3073	38.74	2405	39.22	3090	41.1	2748	40.71	11	33996920	34042295	+	Lcp2	lymphocyte cytosolic protein 2 [Source:MGI Symbol%3BAcc:MGI:1321402]	GO:0050663:cytokine secretion;GO:0045576:mast cell activation;	GO:0005737:cytoplasm;	-	K07361	;ko04015 Rap1 signaling pathway;ko04380 Osteoclast differentiation;ko04611 Platelet activation;ko04650 Natural killer cell mediated cytotoxicity;ko04660 T cell receptor signaling pathway;ko04664 Fc epsilon RI signaling pathway;ko05135 Yersinia infection;
ENSMUSG00000002718	5273	5146	68.74	4541	71.47	6370	67.9	4992	68.84	6214	69.89	5493	68.81	2	166747960	166788309	+	Cse1l	chromosome segregation 1-like (S. cerevisiae) [Source:MGI Symbol%3BAcc:MGI:1339951]	GO:0006886:intracellular protein transport;GO:0008283:cell proliferation;GO:0006915:apoptotic process;	GO:0005737:cytoplasm;GO:0005643:nuclear pore;	GO:0008565:protein transporter activity;GO:0008262:importin-alpha export receptor activity;GO:0005515:protein binding;	K18423	;ko05132 Salmonella infection;
ENSMUSG00000002728	3705	892	16.96	753	16.87	1108	16.81	972	19.08	1159	18.55	999	17.81	2	145744019	145758345	+	Naa20	N(alpha)-acetyltransferase 20%2C NatB catalytic subunit [Source:MGI Symbol%3BAcc:MGI:1915127]	-	GO:0005737:cytoplasm;GO:0005634:nucleus;	GO:0004596:peptide alpha-N-acetyltransferase activity;	K17972	-
ENSMUSG00000002731	2028	194	6.74	135	5.52	221	6.13	161	5.77	225	6.58	184	5.99	2	76460242	76478359	-	Prkra	protein kinase%2C interferon inducible double stranded RNA dependent activator [Source:MGI Symbol%3BAcc:MGI:1344375]	GO:0048705:skeletal system morphogenesis;GO:0006468:protein phosphorylation;GO:0042474:middle ear morphogenesis;GO:0042473:outer ear morphogenesis;GO:0030422:production of siRNA involved in RNA interference;GO:0006950:response to stress;	GO:0005737:cytoplasm;	GO:0003725:double-stranded RNA binding;GO:0016301:kinase activity;GO:0042803:protein homodimerization activity;	-	-
ENSMUSG00000002732	1485	42	1.99	32	1.79	34	1.29	34	1.66	30	1.2	31	1.38	2	76493388	76503460	-	Fkbp7	FK506 binding protein 7 [Source:MGI Symbol%3BAcc:MGI:1336879]	GO:0006457:protein folding;GO:0018208:peptidyl-proline modification;	GO:0016020:membrane;GO:0005783:endoplasmic reticulum;	GO:0005528:FK506 binding;GO:0005515:protein binding;GO:0005509:calcium ion binding;GO:0003755:peptidyl-prolyl cis-trans isomerase activity;	K09573	-
ENSMUSG00000002733	3126	1565	35.26	1403	37.25	1993	35.84	1449	33.71	1741	33.03	1460	30.85	2	76505625	76527172	+	Plekha3	pleckstrin homology domain-containing%2C family A (phosphoinositide binding specific) member 3 [Source:MGI Symbol%3BAcc:MGI:1932515]	-	GO:0016020:membrane;GO:0005794:Golgi apparatus;	GO:0005545:1-phosphatidylinositol binding;	-	-
ENSMUSG00000002741	2984	1303	30.76	1137	31.62	1661	31.29	1348	32.85	1621	32.22	1429	31.63	11	5905693	5917780	+	Ykt6	YKT6 v-SNARE homolog (S. cerevisiae) [Source:MGI Symbol%3BAcc:MGI:1927550]	GO:0042147:retrograde transport, endosome to Golgi;GO:0006903:vesicle targeting;GO:0006888:ER to Golgi vesicle-mediated transport;GO:0008152:metabolic process;GO:0006904:vesicle docking involved in exocytosis;GO:0015031:protein transport;	GO:0005768:endosome;GO:0031410:cytoplasmic vesicle;GO:0031201:SNARE complex;GO:0005783:endoplasmic reticulum;GO:0005794:Golgi apparatus;GO:0005887:integral component of plasma membrane;	GO:0019706:protein-cysteine S-palmitoyltransferase activity;GO:0005484:SNAP receptor activity;	K08516	;ko04130 SNARE interactions in vesicular transport;ko04138 Autophagy - yeast;
ENSMUSG00000002748	13667	5235	26.98	4289	26.04	5959	24.51	4886	26	6309	27.38	5132	24.8	5	135216118	135274983	+	Baz1b	bromodomain adjacent to zinc finger domain%2C 1B [Source:MGI Symbol%3BAcc:MGI:1353499]	GO:0043044:ATP-dependent chromatin remodeling;GO:0003007:heart morphogenesis;GO:0034725:DNA replication-dependent nucleosome disassembly;GO:0048096:chromatin-mediated maintenance of transcription;GO:0006302:double-strand break repair;GO:0016572:histone phosphorylation;	GO:0000793:condensed chromosome;GO:0043596:nuclear replication fork;GO:0005721:pericentric heterochromatin;	GO:0042809:vitamin D receptor binding;GO:0008270:zinc ion binding;GO:0004715:non-membrane spanning protein tyrosine kinase activity;GO:0071884:vitamin D receptor activator activity;GO:0035173:histone kinase activity;GO:0003682:chromatin binding;GO:0005524:ATP binding;GO:0070577:lysine-acetylated histone binding;GO:0032947:protein complex scaffold;	K11658	-
ENSMUSG00000002763	3796	384	7.13	331	7.24	532	7.88	394	7.55	518	8.09	442	7.69	17	47022389	47036467	+	Pex6	peroxisomal biogenesis factor 6 [Source:MGI Symbol%3BAcc:MGI:2385054]	GO:0016561:protein import into peroxisome matrix, translocation;GO:0050821:protein stabilization;	GO:0005829:cytosol;GO:0005778:peroxisomal membrane;	GO:0008022:protein C-terminus binding;GO:0032403:protein complex binding;GO:0042623:ATPase activity, coupled;GO:0005524:ATP binding;	K13339	;ko04146 Peroxisome;
ENSMUSG00000002767	1170	704	42.38	566	40.15	924	44.39	740	45.99	877	44.45	836	47.2	17	46957155	46961065	+	Mrpl2	mitochondrial ribosomal protein L2 [Source:MGI Symbol%3BAcc:MGI:1351622]	GO:0006412:translation;	GO:0005762:mitochondrial large ribosomal subunit;	GO:0003735:structural constituent of ribosome;	K02886	;ko03010 Ribosome;
ENSMUSG00000002768	1844	545	20.82	439	19.76	763	23.26	526	20.74	604	19.42	576	20.63	17	46989719	46994037	+	Mea1	male enhanced antigen 1 [Source:MGI Symbol%3BAcc:MGI:96957]	GO:0007275:multicellular organismal development;GO:0030154:cell differentiation;GO:0007283:spermatogenesis;GO:0032501:multicellular organismal process;GO:0044699:single-organism process;GO:0032502:developmental process;	GO:0005737:cytoplasm;	-	K13980	;ko00010 Glycolysis / Gluconeogenesis;ko00071 Fatty acid degradation;ko00350 Tyrosine metabolism;ko00620 Pyruvate metabolism;ko00830 Retinol metabolism;ko00980 Metabolism of xenobiotics by cytochrome P450;ko00982 Drug metabolism - cytochrome P450;ko01100 Metabolic pathways;ko05204 Chemical carcinogenesis;
ENSMUSG00000002769	1206	5	0.29	0	0	1	0.05	1	0.06	4	0.2	0	0	17	47036590	47040094	-	Gnmt	glycine N-methyltransferase [Source:MGI Symbol%3BAcc:MGI:1202304]	GO:0046498:S-adenosylhomocysteine metabolic process;GO:0006555:methionine metabolic process;GO:0006111:regulation of gluconeogenesis;GO:0006730:one-carbon metabolic process;GO:0032259:methylation;GO:0051289:protein homotetramerization;GO:0005977:glycogen metabolic process;GO:0046500:S-adenosylmethionine metabolic process;	GO:0005829:cytosol;GO:0005634:nucleus;	GO:0016594:glycine binding;GO:0005542:folic acid binding;GO:0017174:glycine N-methyltransferase activity;	K00552	;ko00260 Glycine, serine and threonine metabolism;ko01100 Metabolic pathways;
ENSMUSG00000002771	6658	7	0.07	2	0.02	8	0.07	7	0.08	8	0.07	3	0.03	7	45481307	45527802	-	Grin2d	glutamate receptor%2C ionotropic%2C NMDA2D (epsilon 4) [Source:MGI Symbol%3BAcc:MGI:95823]	-	-	-	K05212	;ko04020 Calcium signaling pathway;ko04024 cAMP signaling pathway;ko04080 Neuroactive ligand-receptor interaction;ko04713 Circadian entrainment;ko04720 Long-term potentiation;ko04724 Glutamatergic synapse;ko05010 Alzheimer disease;ko05014 Amyotrophic lateral sclerosis;ko05017 Spinocerebellar ataxia;ko05020 Prion disease;ko05022 Pathways of neurodegeneration - multiple diseases;ko05030 Cocaine add…
ENSMUSG00000002778	1874	1197	44.99	1063	47.07	1616	48.47	1105	42.88	1371	43.39	1204	42.44	7	45522196	45533156	+	Kdelr1	KDEL (Lys-Asp-Glu-Leu) endoplasmic reticulum protein retention receptor 1 [Source:MGI Symbol%3BAcc:MGI:1915387]	GO:0006621:protein retention in ER lumen;GO:0016192:vesicle-mediated transport;GO:0015031:protein transport;	GO:0005789:endoplasmic reticulum membrane;GO:0005794:Golgi apparatus;GO:0005793:endoplasmic reticulum-Golgi intermediate compartment;GO:0016021:integral component of membrane;GO:0005801:cis-Golgi network;GO:0005783:endoplasmic reticulum;	GO:0046923:ER retention sequence binding;	K10949	;ko05110 Vibrio cholerae infection;
ENSMUSG00000002781	7518	266	2.49	215	2.37	296	2.21	280	2.71	300	2.37	265	2.33	7	45546365	45566837	+	Tmem143	transmembrane protein 143 [Source:MGI Symbol%3BAcc:MGI:1917459]	-	GO:0016021:integral component of membrane;GO:0005739:mitochondrion;	-	-	-
ENSMUSG00000002791	3119	2	0.05	3	0.08	1	0.02	0	0	1	0.02	2	0.04	17	32295057	32326324	-	Pdxk-ps	pyridoxal (pyridoxine%2C vitamin B6) kinase%2C pseudogene [Source:MGI Symbol%3BAcc:MGI:1933201]	-	-	-	-	-
ENSMUSG00000002797	7745	143	1.3	128	1.37	173	1.26	128	1.2	151	1.16	151	1.29	6	54959565	54969935	-	Ggct	gamma-glutamyl cyclotransferase [Source:MGI Symbol%3BAcc:MGI:95700]	GO:0001836:release of cytochrome c from mitochondria;GO:0006750:glutathione biosynthetic process;	GO:0005829:cytosol;	GO:0003839:gamma-glutamylcyclotransferase activity;GO:0042803:protein homodimerization activity;	K00682	;ko00480 Glutathione metabolism;ko01100 Metabolic pathways;
ENSMUSG00000002799	6965	42	0.42	25	0.3	44	0.36	29	0.3	45	0.38	36	0.34	12	112871439	112893396	-	Jag2	jagged 2 [Source:MGI Symbol%3BAcc:MGI:1098270]	GO:0030155:regulation of cell adhesion;GO:0001709:cell fate determination;GO:0003016:respiratory system process;GO:0042475:odontogenesis of dentin-containing tooth;GO:0042492:gamma-delta T cell differentiation;GO:0016331:morphogenesis of embryonic epithelium;GO:0009912:auditory receptor cell fate commitment;GO:0007219:Notch signaling pathway;GO:0007283:spermatogenesis;GO:0001501:skeletal system d…	GO:0048471:perinuclear region of cytoplasm;GO:0005887:integral component of plasma membrane;	GO:0005509:calcium ion binding;GO:0005112:Notch binding;GO:0008083:growth factor activity;	K06052	;ko01522 Endocrine resistance;ko04330 Notch signaling pathway;ko04371 Apelin signaling pathway;ko04658 Th1 and Th2 cell differentiation;ko04668 TNF signaling pathway;ko05165 Human papillomavirus infection;ko05200 Pathways in cancer;ko05224 Breast cancer;
ENSMUSG00000002803	2324	179	5.43	170	6.07	227	5.49	165	5.16	223	5.69	175	4.97	12	112940102	112942565	+	Btbd6	BTB (POZ) domain containing 6 [Source:MGI Symbol%3BAcc:MGI:3026623]	-	GO:0005737:cytoplasm;	-	K10478	-
ENSMUSG00000002804	1587	103	4.57	84	4.39	128	4.53	106	4.86	144	5.38	116	4.83	12	112897911	112905744	-	Nudt14	nudix (nucleoside diphosphate linked moiety X)-type motif 14 [Source:MGI Symbol%3BAcc:MGI:1913424]	-	GO:0005737:cytoplasm;	GO:0046872:metal ion binding;GO:0008768:UDP-sugar diphosphatase activity;GO:0047631:ADP-ribose diphosphatase activity;	K08077	-
ENSMUSG00000002808	2745	3	0.08	1	0.03	0	0	2	0.05	0	0	0	0	13	19775876	19804097	-	Epdr1	ependymin related protein 1 (zebrafish) [Source:MGI Symbol%3BAcc:MGI:2145369]	GO:0007160:cell-matrix adhesion;	GO:0005576:extracellular region;GO:0005764:lysosome;	GO:0005509:calcium ion binding;	-	-
ENSMUSG00000002812	5039	1667	23.3	1387	22.84	2080	23.2	1532	22.11	1889	22.23	1633	21.41	11	60604949	60618089	-	Flii	flightless I actin binding protein [Source:MGI Symbol%3BAcc:MGI:1342286]	GO:0006355:regulation of transcription, DNA-templated;GO:0051014:actin filament severing;GO:0030036:actin cytoskeleton organization;GO:0007275:multicellular organismal development;	GO:0030054:cell junction;GO:0005730:nucleolus;GO:0005813:centrosome;GO:0005737:cytoplasm;	GO:0003779:actin binding;	-	-
ENSMUSG00000002814	4599	473	7.24	396	7.15	559	6.83	472	7.46	558	7.2	486	6.98	11	60630884	60668191	-	Top3a	topoisomerase (DNA) III alpha [Source:MGI Symbol%3BAcc:MGI:1197527]	GO:0006265:DNA topological change;	GO:0005694:chromosome;GO:0016605:PML body;	GO:0003917:DNA topoisomerase type I activity;GO:0008270:zinc ion binding;GO:0005524:ATP binding;	K03165	;ko03440 Homologous recombination;ko03460 Fanconi anemia pathway;
ENSMUSG00000002820	7264	331	3.21	341	3.9	488	3.78	358	3.58	431	3.52	432	3.93	9	21176589	21189068	+	Atg4d	autophagy related 4D%2C cysteine peptidase [Source:MGI Symbol%3BAcc:MGI:2444308]	GO:0015031:protein transport;GO:0006914:autophagy;GO:0006508:proteolysis;GO:0006810:transport;	GO:0005737:cytoplasm;	GO:0004197:cysteine-type endopeptidase activity;	K08342	;ko04136 Autophagy - other;ko04138 Autophagy - yeast;ko04140 Autophagy - animal;
ENSMUSG00000002825	1973	385	13.74	335	14.09	517	14.73	354	13.05	426	12.8	403	13.49	9	21323133	21331570	+	Qtrt1	queuine tRNA-ribosyltransferase catalytic subunit 1 [Source:MGI Symbol%3BAcc:MGI:1931441]	GO:0008616:queuosine biosynthetic process;	GO:0005739:mitochondrion;GO:0005634:nucleus;	GO:0046872:metal ion binding;GO:0005515:protein binding;GO:0008479:queuine tRNA-ribosyltransferase activity;	K00773	-
ENSMUSG00000002831	6350	3	0.03	0	0	1	0.01	1	0.01	1	0.01	1	0.01	17	56407591	56416803	-	Plin4	perilipin 4 [Source:MGI Symbol%3BAcc:MGI:1929709]	-	GO:0005811:lipid particle;GO:0005886:plasma membrane;	-	-	-
ENSMUSG00000002833	4876	957	13.82	834	14.19	1199	13.82	917	13.68	1086	13.21	968	13.11	17	56386634	56407607	+	Hdgfl2	HDGF like 2 [Source:MGI Symbol%3BAcc:MGI:1194492]	GO:0006351:transcription, DNA-templated;	GO:0005634:nucleus;	GO:0003677:DNA binding;	K16641	-
ENSMUSG00000002835	8854	1984	15.78	1770	16.59	2695	17.11	2030	16.67	2378	15.93	2060	15.37	17	56347439	56379289	+	Chaf1a	chromatin assembly factor 1%2C subunit A (p150) [Source:MGI Symbol%3BAcc:MGI:1351331]	GO:0031497:chromatin assembly;GO:0006281:DNA repair;GO:0007049:cell cycle;GO:0006355:regulation of transcription, DNA-templated;GO:0006260:DNA replication;	GO:0033186:CAF-1 complex;	GO:0070087:chromo shadow domain binding;	K10750	-
ENSMUSG00000002844	2966	941	22.35	738	20.65	1274	24.14	955	23.41	1184	23.67	1129	25.14	16	38264392	38273065	-	Adprh	ADP-ribosylarginine hydrolase [Source:MGI Symbol%3BAcc:MGI:1098234]	GO:0051725:protein de-ADP-ribosylation;	-	GO:0003875:ADP-ribosylarginine hydrolase activity;GO:0000287:magnesium ion binding;	K01245	-
ENSMUSG00000002845	4094	629	10.82	506	10.26	787	10.81	594	10.55	730	10.57	682	11	16	38379060	38412524	+	Tmem39a	transmembrane protein 39a [Source:MGI Symbol%3BAcc:MGI:1915096]	-	GO:0016021:integral component of membrane;GO:0016020:membrane;	-	-	-
ENSMUSG00000002846	1784	280	11.05	179	8.33	403	12.7	287	11.7	395	13.13	270	10	16	38318709	38343025	-	Timmdc1	translocase of inner mitochondrial membrane domain containing 1 [Source:MGI Symbol%3BAcc:MGI:1922139]	-	GO:0016021:integral component of membrane;GO:0005739:mitochondrion;	-	-	-
ENSMUSG00000002847	2009	47	1.65	53	2.19	76	2.13	71	2.57	68	2.01	70	2.3	16	38216479	38253507	-	Pla1a	phospholipase A1 member A [Source:MGI Symbol%3BAcc:MGI:1934677]	GO:0006631:fatty acid metabolic process;GO:0042997:negative regulation of Golgi to plasma membrane protein transport;GO:0016042:lipid catabolic process;GO:0002084:protein depalmitoylation;	GO:0005829:cytosol;GO:0005739:mitochondrion;GO:0005576:extracellular region;	GO:0008474:palmitoyl-(protein) hydrolase activity;GO:0004622:lysophospholipase activity;	K13618	;ko00564 Glycerophospholipid metabolism;ko04014 Ras signaling pathway;
ENSMUSG00000002870	6956	4207	42.6	3745	44.68	5376	43.44	4155	43.44	5113	43.59	4471	42.46	6	88860456	88875762	-	Mcm2	minichromosome maintenance complex component 2 [Source:MGI Symbol%3BAcc:MGI:105380]	GO:0006268:DNA unwinding involved in DNA replication;GO:0007049:cell cycle;GO:0071353:cellular response to interleukin-4;GO:0006270:DNA replication initiation;GO:0006334:nucleosome assembly;	GO:0005664:nuclear origin of replication recognition complex;GO:0042555:MCM complex;GO:0000785:chromatin;	GO:0003678:DNA helicase activity;GO:0042393:histone binding;GO:0046872:metal ion binding;GO:0005524:ATP binding;GO:0003688:DNA replication origin binding;	K02540	;ko03030 DNA replication;ko04110 Cell cycle;ko04111 Cell cycle - yeast;ko04113 Meiosis - yeast;
ENSMUSG00000002871	4171	348	5.88	258	5.13	434	5.85	369	6.43	467	6.64	370	5.86	6	88879233	88889220	+	Tpra1	transmembrane protein%2C adipocyte asscociated 1 [Source:MGI Symbol%3BAcc:MGI:1345190]	GO:0006629:lipid metabolic process;GO:0007568:aging;GO:0007186:G-protein coupled receptor signaling pathway;	GO:0016021:integral component of membrane;	GO:0004930:G-protein coupled receptor activity;	-	-
ENSMUSG00000002881	4100	1430	24.57	1185	23.99	1757	24.09	1279	22.68	1683	24.34	1477	23.8	1	52496453	52539838	-	Nab1	Ngfi-A binding protein 1 [Source:MGI Symbol%3BAcc:MGI:107564]	GO:0042552:myelination;GO:0045682:regulation of epidermis development;GO:0014037:Schwann cell differentiation;GO:0001958:endochondral ossification;GO:0045892:negative regulation of transcription, DNA-templated;GO:0050789:regulation of biological process;GO:0044763:single-organism cellular process;GO:0007399:nervous system development;GO:0048513:organ development;	GO:0005634:nucleus;	GO:0008134:transcription factor binding;	-	-
ENSMUSG00000002885	3757	37	0.69	37	0.82	50	0.75	43	0.83	50	0.79	33	0.58	8	84449880	84467955	-	Adgre5	adhesion G protein-coupled receptor E5 [Source:MGI Symbol%3BAcc:MGI:1347095]	GO:0007155:cell adhesion;GO:0007218:neuropeptide signaling pathway;	GO:0005886:plasma membrane;GO:0016021:integral component of membrane;	GO:0004930:G-protein coupled receptor activity;GO:0005509:calcium ion binding;	K08446	-
ENSMUSG00000002897	8662	551	4.48	476	4.56	706	4.58	647	5.43	765	5.24	688	5.25	6	120440208	120464520	+	Il17ra	interleukin 17 receptor A [Source:MGI Symbol%3BAcc:MGI:107399]	GO:0071345:cellular response to cytokine stimulus;GO:0072537:fibroblast activation;GO:1900017:positive regulation of cytokine production involved in inflammatory response;GO:0032747:positive regulation of interleukin-23 production;	GO:0005886:plasma membrane;GO:0016021:integral component of membrane;	-	K05164	;ko04060 Cytokine-cytokine receptor interaction;ko04657 IL-17 signaling pathway;
ENSMUSG00000002900	9917	4	0.03	0	0	10	0.06	3	0.02	0	0	0	0	12	31315233	31379643	+	Lamb1	laminin B1 [Source:MGI Symbol%3BAcc:MGI:96743]	GO:0042476:odontogenesis;GO:0007566:embryo implantation;GO:0007611:learning or memory;GO:0031175:neuron projection development;GO:0007162:negative regulation of cell adhesion;GO:0034446:substrate adhesion-dependent cell spreading;GO:0030335:positive regulation of cell migration;	GO:0070062:extracellular exosome;GO:0005606:laminin-1 complex;GO:0005615:extracellular space;GO:0043257:laminin-8 complex;GO:0048471:perinuclear region of cytoplasm;GO:0043259:laminin-10 complex;GO:0005607:laminin-2 complex;	GO:0043208:glycosphingolipid binding;GO:0019899:enzyme binding;GO:0005178:integrin binding;GO:0005201:extracellular matrix structural constituent;	K05636	;ko04151 PI3K-Akt signaling pathway;ko04510 Focal adhesion;ko04512 ECM-receptor interaction;ko05145 Toxoplasmosis;ko05146 Amoebiasis;ko05165 Human papillomavirus infection;ko05200 Pathways in cancer;ko05222 Small cell lung cancer;
ENSMUSG00000002908	4587	12	0.18	9	0.16	7	0.09	11	0.17	12	0.16	20	0.29	8	71294693	71315902	-	Kcnn1	potassium intermediate/small conductance calcium-activated channel%2C subfamily N%2C member 1 [Source:MGI Symbol%3BAcc:MGI:1933993]	GO:0006813:potassium ion transport;	GO:0005737:cytoplasm;GO:0005886:plasma membrane;GO:0016021:integral component of membrane;GO:0043025:neuronal cell body;	GO:0016286:small conductance calcium-activated potassium channel activity;GO:0046982:protein heterodimerization activity;GO:0005516:calmodulin binding;	K04942	;ko04911 Insulin secretion;ko04929 GnRH secretion;
ENSMUSG00000002910	3232	147	3.2	116	2.98	194	3.37	134	3.01	133	2.44	128	2.62	8	71287773	71292364	-	Arrdc2	arrestin domain containing 2 [Source:MGI Symbol%3BAcc:MGI:1918057]	GO:0007165:signal transduction;	-	-	-	-
ENSMUSG00000002930	1757	0	0	0	0	0	0	0	0	0	0	0	0	6	55994482	56009674	+	Ppp1r17	protein phosphatase 1%2C regulatory subunit 17 [Source:MGI Symbol%3BAcc:MGI:1333876]	GO:0010921:regulation of phosphatase activity;GO:0043086:negative regulation of catalytic activity;	GO:0005829:cytosol;	GO:0004865:protein serine/threonine phosphatase inhibitor activity;	K08067	;ko04730 Long-term depression;
ENSMUSG00000002944	3590	1735	34.04	1652	38.19	2073	32.46	1316	26.66	1794	29.64	1472	27.08	5	17986688	18093799	-	Cd36	CD36 molecule [Source:MGI Symbol%3BAcc:MGI:107899]	GO:0032755:positive regulation of interleukin-6 production;GO:0006641:triglyceride metabolic process;GO:0071447:cellular response to hydroperoxide;GO:0032735:positive regulation of interleukin-12 production;GO:0016525:negative regulation of angiogenesis;GO:0050830:defense response to Gram-positive bacterium;GO:0019395:fatty acid oxidation;GO:0015911:plasma membrane long-chain fatty acid transport…	GO:0005901:caveola;GO:0005783:endoplasmic reticulum;GO:0043234:protein complex;GO:0042383:sarcolemma;GO:0016021:integral component of membrane;GO:0005794:Golgi apparatus;GO:0005739:mitochondrion;GO:0009897:external side of plasma membrane;GO:0045177:apical part of cell;	GO:0070892:lipoteichoic acid receptor activity;GO:0070053:thrombospondin receptor activity;GO:0030169:low-density lipoprotein particle binding;GO:0050431:transforming growth factor beta binding;GO:0008035:high-density lipoprotein particle binding;GO:0070538:oleic acid binding;GO:0005041:low-density lipoprotein receptor activity;	K06259	;ko03320 PPAR signaling pathway;ko04145 Phagosome;ko04152 AMPK signaling pathway;ko04512 ECM-receptor interaction;ko04640 Hematopoietic cell lineage;ko04920 Adipocytokine signaling pathway;ko04931 Insulin resistance;ko04975 Fat digestion and absorption;ko04979 Cholesterol metabolism;ko05144 Malaria;
ENSMUSG00000002948	3829	713	13.12	639	13.85	941	13.81	640	12.15	773	11.97	681	11.75	8	4288740	4297897	+	Map2k7	mitogen-activated protein kinase kinase 7 [Source:MGI Symbol%3BAcc:MGI:1346871]	GO:0007257:activation of JUN kinase activity;GO:0043525:positive regulation of neuron apoptotic process;	GO:0005829:cytosol;GO:0005634:nucleus;	GO:0008022:protein C-terminus binding;GO:0004713:protein tyrosine kinase activity;GO:0004674:protein serine/threonine kinase activity;GO:0000287:magnesium ion binding;GO:0019903:protein phosphatase binding;GO:0008545:JUN kinase kinase activity;GO:0005524:ATP binding;GO:0031435:mitogen-activated protein kinase kinase kinase binding;	K04431	;ko04010 MAPK signaling pathway;ko04012 ErbB signaling pathway;ko04013 MAPK signaling pathway - fly;ko04141 Protein processing in endoplasmic reticulum;ko04214 Apoptosis - fly;ko04361 Axon regeneration;ko04380 Osteoclast differentiation;ko04530 Tight junction;ko04620 Toll-like receptor signaling pathway;ko04624 Toll and Imd signaling pathway;ko04660 T cell receptor signaling pathway;ko04664 Fc ep…
ENSMUSG00000002949	3664	1239	23.82	1000	22.65	1475	22.63	1124	22.31	1398	22.63	1288	23.22	8	4309731	4325913	-	Timm44	translocase of inner mitochondrial membrane 44 [Source:MGI Symbol%3BAcc:MGI:1343262]	GO:0055085:transmembrane transport;GO:0006886:intracellular protein transport;	GO:0005744:mitochondrial inner membrane presequence translocase complex;GO:0005759:mitochondrial matrix;	GO:0015450:P-P-bond-hydrolysis-driven protein transmembrane transporter activity;GO:0051087:chaperone binding;GO:0019899:enzyme binding;GO:0005524:ATP binding;	K17804	-
ENSMUSG00000002957	5663	1514	18.83	1258	18.43	1882	18.68	1477	18.97	1731	18.13	1490	17.38	7	141142086	141212924	+	Ap2a2	adaptor-related protein complex 2%2C alpha 2 subunit [Source:MGI Symbol%3BAcc:MGI:101920]	GO:0006886:intracellular protein transport;GO:0006897:endocytosis;	GO:0005905:coated pit;GO:0005886:plasma membrane;GO:0030141:secretory granule;GO:0030131:clathrin adaptor complex;	GO:0008289:lipid binding;GO:0005515:protein binding;GO:0008565:protein transporter activity;	K11824	;ko04144 Endocytosis;ko04721 Synaptic vesicle cycle;ko04961 Endocrine and other factor-regulated calcium reabsorption;ko05016 Huntington disease;
ENSMUSG00000002963	3250	353	7.65	277	7.07	442	7.64	378	8.46	457	8.34	411	8.35	7	44506563	44512416	+	Pnkp	polynucleotide kinase 3'- phosphatase [Source:MGI Symbol%3BAcc:MGI:1891698]	GO:0006979:response to oxidative stress;GO:0046939:nucleotide phosphorylation;GO:0006281:DNA repair;GO:0042769:DNA damage response, detection of DNA damage;GO:0016311:dephosphorylation;	GO:0005730:nucleolus;GO:0005634:nucleus;	GO:0046404:ATP-dependent polydeoxyribonucleotide 5'-hydroxyl-kinase activity;GO:0019201:nucleotide kinase activity;GO:0046403:polynucleotide 3'-phosphatase activity;GO:0005524:ATP binding;GO:0000166:nucleotide binding;	K08073	-
ENSMUSG00000002968	7629	897	8.28	705	7.67	1077	7.94	763	7.27	1057	8.22	881	7.63	7	44526189	44542136	-	Med25	mediator complex subunit 25 [Source:MGI Symbol%3BAcc:MGI:1922863]	GO:0044699:single-organism process;GO:0006357:regulation of transcription from RNA polymerase II promoter;GO:0048522:positive regulation of cellular process;GO:0048523:negative regulation of cellular process;GO:0000122:negative regulation of transcription from RNA polymerase II promoter;GO:0035563:positive regulation of chromatin binding;GO:2001178:positive regulation of mediator complex assembly…	GO:0016592:mediator complex;	GO:0046965:retinoid X receptor binding;GO:0001104:RNA polymerase II transcription cofactor activity;	K15168	-
ENSMUSG00000002980	3199	0	0	2	0.05	2	0.04	0	0	2	0.04	5	0.1	7	19490056	19504941	-	Bcam	basal cell adhesion molecule [Source:MGI Symbol%3BAcc:MGI:1929940]	GO:0007160:cell-matrix adhesion;	GO:0009986:cell surface;GO:0005887:integral component of plasma membrane;	GO:0005055:laminin receptor activity;GO:0043236:laminin binding;	K06578	-
ENSMUSG00000002981	6210	2213	25.1	1731	23.13	2744	24.84	2116	24.78	2616	24.98	2361	25.11	7	19365496	19398958	-	Clptm1	cleft lip and palate associated transmembrane protein 1 [Source:MGI Symbol%3BAcc:MGI:1927155]	GO:0033081:regulation of T cell differentiation in thymus;	GO:0009897:external side of plasma membrane;GO:0016021:integral component of membrane;	-	-	-
ENSMUSG00000002983	3885	114	2.07	64	1.37	127	1.84	82	1.53	120	1.83	98	1.67	7	19340142	19363363	-	Relb	avian reticuloendotheliosis viral (v-rel) oncogene related B [Source:MGI Symbol%3BAcc:MGI:103289]	GO:0045063:T-helper 1 cell differentiation;GO:0006355:regulation of transcription, DNA-templated;GO:0019882:antigen processing and presentation;GO:0010628:positive regulation of gene expression;GO:0043011:myeloid dendritic cell differentiation;	GO:0005829:cytosol;GO:0005856:cytoskeleton;GO:0005634:nucleus;	GO:0003677:DNA binding;GO:0005515:protein binding;GO:0003700:sequence-specific DNA binding transcription factor activity;	K09253	;ko04010 MAPK signaling pathway;ko04064 NF-kappa B signaling pathway;ko04380 Osteoclast differentiation;ko04625 C-type lectin receptor signaling pathway;ko05166 Human T-cell leukemia virus 1 infection;ko05169 Epstein-Barr virus infection;
ENSMUSG00000002984	4513	2270	35.43	1899	34.92	3090	38.49	2191	35.3	2690	35.35	2431	35.58	7	19435238	19449363	-	Tomm40	translocase of outer mitochondrial membrane 40 [Source:MGI Symbol%3BAcc:MGI:1858259]	GO:0055085:transmembrane transport;GO:0044070:regulation of anion transport;GO:0006626:protein targeting to mitochondrion;GO:0044267:cellular protein metabolic process;GO:0006811:ion transport;	GO:0005742:mitochondrial outer membrane translocase complex;GO:0031307:integral component of mitochondrial outer membrane;GO:0046930:pore complex;	GO:0015288:porin activity;GO:0008320:protein transmembrane transporter activity;GO:0008308:voltage-gated anion channel activity;	K11518	;ko05014 Amyotrophic lateral sclerosis;ko05022 Pathways of neurodegeneration - multiple diseases;
ENSMUSG00000002985	2138	123	4.05	115	4.46	209	5.49	109	3.71	92	2.55	108	3.34	7	19430034	19433113	-	Apoe	apolipoprotein E [Source:MGI Symbol%3BAcc:MGI:88057]	GO:0034374:low-density lipoprotein particle remodeling;GO:0042159:lipoprotein catabolic process;GO:0006979:response to oxidative stress;GO:0006874:cellular calcium ion homeostasis;GO:0031103:axon regeneration;GO:0034384:high-density lipoprotein particle clearance;GO:0033700:phospholipid efflux;GO:0045773:positive regulation of axon extension;GO:0006641:triglyceride metabolic process;GO:0043407:ne…	GO:0043025:neuronal cell body;GO:0034362:low-density lipoprotein particle;GO:0005769:early endosome;GO:0005770:late endosome;GO:0005794:Golgi apparatus;GO:0042627:chylomicron;GO:0034364:high-density lipoprotein particle;GO:0031232:extrinsic component of external side of plasma membrane;GO:0034361:very-low-density lipoprotein particle;GO:0005874:microtubule;GO:0030425:dendrite;GO:0034363:intermedi…	GO:0048156:tau protein binding;GO:0046848:hydroxyapatite binding;GO:0017127:cholesterol transporter activity;GO:0060228:phosphatidylcholine-sterol O-acyltransferase activator activity;GO:0046982:protein heterodimerization activity;GO:0042803:protein homodimerization activity;GO:0001540:beta-amyloid binding;GO:0008201:heparin binding;GO:0071813:lipoprotein particle binding;GO:0070326:very-low-dens…	K04524	;ko04979 Cholesterol metabolism;ko05010 Alzheimer disease;
ENSMUSG00000002992	813	0	0	0	0	0	0	0	0	0	0	0	0	7	19405504	19411866	-	Apoc2	apolipoprotein C-II [Source:MGI Symbol%3BAcc:MGI:88054]	GO:0042953:lipoprotein transport;GO:0043086:negative regulation of catalytic activity;GO:0033344:cholesterol efflux;GO:0045723:positive regulation of fatty acid biosynthetic process;GO:0010898:positive regulation of triglyceride catabolic process;GO:0060697:positive regulation of phospholipid catabolic process;GO:0051006:positive regulation of lipoprotein lipase activity;GO:0045833:negative regul…	GO:0042627:chylomicron;GO:0034366:spherical high-density lipoprotein particle;GO:0034361:very-low-density lipoprotein particle;GO:0034363:intermediate-density lipoprotein particle;GO:0034362:low-density lipoprotein particle;	GO:0060230:lipoprotein lipase activator activity;GO:0043274:phospholipase binding;GO:0016004:phospholipase activator activity;GO:0055102:lipase inhibitor activity;GO:0008289:lipid binding;GO:0042803:protein homodimerization activity;	-	-
ENSMUSG00000002996	6167	330	3.77	247	3.32	442	4.03	287	3.38	431	4.14	352	3.77	12	31976253	32000534	-	Hbp1	high mobility group box transcription factor 1 [Source:MGI Symbol%3BAcc:MGI:894659]	GO:0016055:Wnt signaling pathway;GO:0043268:positive regulation of potassium ion transport;GO:0006355:regulation of transcription, DNA-templated;	GO:0005634:nucleus;	GO:0003723:RNA binding;GO:0003677:DNA binding;GO:0005515:protein binding;	-	-
ENSMUSG00000002997	3652	318	6.13	277	6.29	445	6.85	303	6.03	408	6.63	333	6.02	12	32008475	32111295	-	Prkar2b	protein kinase%2C cAMP dependent regulatory%2C type II beta [Source:MGI Symbol%3BAcc:MGI:97760]	GO:0097332:response to antipsychotic drug;GO:0045859:regulation of protein kinase activity;GO:0007612:learning;GO:0008283:cell proliferation;GO:0097338:response to clozapine;GO:0006631:fatty acid metabolic process;GO:0007165:signal transduction;GO:0009887:organ morphogenesis;	GO:0045121:membrane raft;GO:0005743:mitochondrial inner membrane;GO:0005813:centrosome;GO:0005952:cAMP-dependent protein kinase complex;GO:0048471:perinuclear region of cytoplasm;GO:0005886:plasma membrane;	GO:0008603:cAMP-dependent protein kinase regulator activity;GO:0016301:kinase activity;GO:0030552:cAMP binding;GO:0019904:protein domain specific binding;GO:0031625:ubiquitin protein ligase binding;GO:0034236:protein kinase A catalytic subunit binding;	K04739	;ko04910 Insulin signaling pathway;
ENSMUSG00000003031	4552	554	8.57	446	8.13	723	8.93	448	7.16	546	7.11	447	6.49	6	134897364	134902476	+	Cdkn1b	cyclin-dependent kinase inhibitor 1B [Source:MGI Symbol%3BAcc:MGI:104565]	GO:0045892:negative regulation of transcription, DNA-templated;GO:0071407:cellular response to organic cyclic compound;GO:0008284:positive regulation of cell proliferation;GO:0000082:G1/S transition of mitotic cell cycle;GO:0031116:positive regulation of microtubule polymerization;GO:0060770:negative regulation of epithelial cell proliferation involved in prostate gland development;GO:0007605:sen…	GO:0043234:protein complex;GO:0005829:cytosol;GO:0005634:nucleus;GO:0005768:endosome;	GO:0051087:chaperone binding;GO:0004861:cyclin-dependent protein serine/threonine kinase inhibitor activity;GO:0008656:cysteine-type endopeptidase activator activity involved in apoptotic process;GO:0032403:protein complex binding;GO:0019903:protein phosphatase binding;GO:0016301:kinase activity;GO:0030544:Hsp70 protein binding;	K06624	;ko01522 Endocrine resistance;ko04012 ErbB signaling pathway;ko04066 HIF-1 signaling pathway;ko04068 FoxO signaling pathway;ko04110 Cell cycle;ko04151 PI3K-Akt signaling pathway;ko04933 AGE-RAGE signaling pathway in diabetic complications;ko04934 Cushing syndrome;ko05162 Measles;ko05165 Human papillomavirus infection;ko05169 Epstein-Barr virus infection;ko05200 Pathways in cancer;ko05202 Transcri…
ENSMUSG00000003032	3049	62	1.43	49	1.33	86	1.59	37	0.88	46	0.89	50	1.08	4	55527143	55532466	-	Klf4	Kruppel-like factor 4 (gut) [Source:MGI Symbol%3BAcc:MGI:1342287]	GO:0048662:negative regulation of smooth muscle cell proliferation;GO:0071407:cellular response to organic cyclic compound;GO:0014067:negative regulation of phosphatidylinositol 3-kinase signaling;GO:0034115:negative regulation of heterotypic cell-cell adhesion;GO:0045415:negative regulation of interleukin-8 biosynthetic process;GO:0090051:negative regulation of cell migration involved in sprouti…	GO:0000790:nuclear chromatin;GO:0005667:transcription factor complex;GO:0005730:nucleolus;	GO:0003690:double-stranded DNA binding;GO:0001190:RNA polymerase II transcription factor binding transcription factor activity involved in positive regulation of transcription;GO:0035014:phosphatidylinositol 3-kinase regulator activity;GO:0001085:RNA polymerase II transcription factor binding;GO:0001077:RNA polymerase II core promoter proximal region sequence-specific DNA binding transcription fa…	K17846	;ko04550 Signaling pathways regulating pluripotency of stem cells;
ENSMUSG00000003033	3184	1850	40.92	1554	40.5	2389	42.18	1631	37.25	1966	36.62	1805	37.45	8	72993862	73011229	+	Ap1m1	adaptor-related protein complex AP-1%2C mu subunit 1 [Source:MGI Symbol%3BAcc:MGI:102776]	GO:0016192:vesicle-mediated transport;GO:0006886:intracellular protein transport;GO:0032438:melanosome organization;GO:0035646:endosome to melanosome transport;GO:0006892:post-Golgi vesicle-mediated transport;GO:0050690:regulation of defense response to virus by virus;GO:0019048:modulation by virus of host morphology or physiology;GO:0019886:antigen processing and presentation of exogenous peptid…	GO:0030131:clathrin adaptor complex;GO:0005802:trans-Golgi network;GO:0030665:clathrin-coated vesicle membrane;GO:0005794:Golgi apparatus;GO:0005829:cytosol;GO:0005765:lysosomal membrane;GO:0000139:Golgi membrane;GO:0032588:trans-Golgi network membrane;	GO:0005515:protein binding;	K12393	;ko04142 Lysosome;ko05170 Human immunodeficiency virus 1 infection;
ENSMUSG00000003037	4678	1582	23.82	1335	23.68	2112	25.38	1550	24.09	1805	22.88	1706	24.09	8	72915044	72937748	+	Rab8a	RAB8A%2C member RAS oncogene family [Source:MGI Symbol%3BAcc:MGI:96960]	-	-	-	K07901	;ko04140 Autophagy - animal;ko04144 Endocytosis;ko04152 AMPK signaling pathway;ko04530 Tight junction;ko04972 Pancreatic secretion;ko05014 Amyotrophic lateral sclerosis;ko05022 Pathways of neurodegeneration - multiple diseases;
ENSMUSG00000003038	3060	171	3.94	75	2.03	148	2.72	127	3.02	140	2.71	98	2.12	4	133692049	133695961	-	Hmgn2	high mobility group nucleosomal binding domain 2 [Source:MGI Symbol%3BAcc:MGI:96136]	-	-	-	K11300	-
ENSMUSG00000003039	4409	954	15.24	920	17.32	1374	17.52	954	15.73	1041	14	1062	15.91	8	72973574	72978262	+	Fam32a	family with sequence similarity 32%2C member A [Source:MGI Symbol%3BAcc:MGI:1915172]	GO:0007049:cell cycle;GO:0006915:apoptotic process;	GO:0005730:nucleolus;	-	K13120	-
ENSMUSG00000003051	2217	0	0	0	0	0	0	0	0	0	0	0	0	1	135181313	135186306	-	Elf3	E74-like factor 3 [Source:MGI Symbol%3BAcc:MGI:1101781]	GO:0045892:negative regulation of transcription, DNA-templated;GO:0006954:inflammatory response;GO:0071709:membrane assembly;GO:0007184:SMAD protein import into nucleus;GO:0001824:blastocyst development;GO:0007182:common-partner SMAD protein phosphorylation;GO:0060056:mammary gland involution;GO:0051693:actin filament capping;GO:0072661:protein targeting to plasma membrane;GO:0043001:Golgi to pla…	GO:0008091:spectrin;GO:0043234:protein complex;GO:0032437:cuticular plate;GO:0005886:plasma membrane;GO:0031430:M band;GO:0005794:Golgi apparatus;GO:0005730:nucleolus;	GO:0003700:sequence-specific DNA binding transcription factor activity;GO:0030506:ankyrin binding;GO:0005543:phospholipid binding;GO:0005200:structural constituent of cytoskeleton;GO:0003713:transcription coactivator activity;GO:0032403:protein complex binding;GO:0005516:calmodulin binding;GO:0043565:sequence-specific DNA binding;GO:0003779:actin binding;	K09429	-
ENSMUSG00000003053	3061	0	0	0	0	0	0	0	0	0	0	0	0	19	39257849	39319157	+	Cyp2c29	cytochrome P450%2C family 2%2C subfamily c%2C polypeptide 29 [Source:MGI Symbol%3BAcc:MGI:103238]	GO:0042738:exogenous drug catabolic process;GO:0070989:oxidative demethylation;GO:0006082:organic acid metabolic process;	GO:0016020:membrane;GO:0005783:endoplasmic reticulum;	GO:0009055:electron carrier activity;GO:0005506:iron ion binding;GO:0020037:heme binding;GO:0034875:caffeine oxidase activity;GO:0070330:aromatase activity;	K07413	;ko00140 Steroid hormone biosynthesis;ko00590 Arachidonic acid metabolism;ko00591 Linoleic acid metabolism;ko00830 Retinol metabolism;ko01100 Metabolic pathways;ko04726 Serotonergic synapse;ko04750 Inflammatory mediator regulation of TRP channels;ko05204 Chemical carcinogenesis;
ENSMUSG00000003062	5600	313	3.94	311	4.61	516	5.18	376	4.88	486	5.15	417	4.92	13	19541846	19579965	-	Stard3nl	STARD3 N-terminal like [Source:MGI Symbol%3BAcc:MGI:1923455]	-	GO:0016021:integral component of membrane;GO:0005768:endosome;	-	-	-
ENSMUSG00000003068	4580	1381	21.24	1169	21.18	1810	22.21	1290	20.48	1615	20.91	1462	21.09	10	79951637	79966516	+	Stk11	serine/threonine kinase 11 [Source:MGI Symbol%3BAcc:MGI:1341870]	GO:0043276:anoikis;GO:0001894:tissue homeostasis;GO:0006914:autophagy;GO:0033762:response to glucagon;GO:0030010:establishment of cell polarity;GO:0030111:regulation of Wnt signaling pathway;GO:0050772:positive regulation of axonogenesis;GO:0060770:negative regulation of epithelial cell proliferation involved in prostate gland development;GO:0030511:positive regulation of transforming growth fact…	GO:0043234:protein complex;GO:0005829:cytosol;GO:0005739:mitochondrion;GO:0005634:nucleus;GO:0016020:membrane;	GO:0004674:protein serine/threonine kinase activity;GO:0000287:magnesium ion binding;GO:0002039:p53 binding;GO:0032403:protein complex binding;GO:0042802:identical protein binding;GO:0005524:ATP binding;GO:0030275:LRR domain binding;GO:0030295:protein kinase activator activity;	K07298	;ko04068 FoxO signaling pathway;ko04140 Autophagy - animal;ko04150 mTOR signaling pathway;ko04151 PI3K-Akt signaling pathway;ko04152 AMPK signaling pathway;ko04211 Longevity regulating pathway;ko04530 Tight junction;ko04920 Adipocytokine signaling pathway;
ENSMUSG00000003070	2131	0	0	0	0	5	0.13	0	0	2	0.06	3	0.09	10	80015316	80025844	+	Efna2	ephrin A2 [Source:MGI Symbol%3BAcc:MGI:102707]	GO:0046849:bone remodeling;GO:0048013:ephrin receptor signaling pathway;GO:0030316:osteoclast differentiation;	GO:0031594:neuromuscular junction;GO:0005886:plasma membrane;GO:0043204:perikaryon;GO:0031225:anchored component of membrane;	GO:0046875:ephrin receptor binding;	K05462	;ko04010 MAPK signaling pathway;ko04014 Ras signaling pathway;ko04015 Rap1 signaling pathway;ko04151 PI3K-Akt signaling pathway;ko04360 Axon guidance;ko05206 MicroRNAs in cancer;
ENSMUSG00000003072	1928	2252	82.27	1892	81.44	3257	94.96	2134	80.49	2618	80.53	2381	81.58	10	79974466	79981652	+	Atp5d	ATP synthase%2C H+ transporting%2C mitochondrial F1 complex%2C delta subunit [Source:MGI Symbol%3BAcc:MGI:1913293]	GO:0006172:ADP biosynthetic process;GO:0015986:ATP synthesis coupled proton transport;	GO:0000275:mitochondrial proton-transporting ATP synthase complex, catalytic core F(1);	GO:0046961:proton-transporting ATPase activity, rotational mechanism;GO:0046933:proton-transporting ATP synthase activity, rotational mechanism;GO:0032403:protein complex binding;	K02134	;ko00190 Oxidative phosphorylation;ko01100 Metabolic pathways;ko04714 Thermogenesis;ko05010 Alzheimer disease;ko05012 Parkinson disease;ko05014 Amyotrophic lateral sclerosis;ko05016 Huntington disease;ko05020 Prion disease;ko05022 Pathways of neurodegeneration - multiple diseases;
ENSMUSG00000003099	3136	2522	56.64	2005	53.06	3115	55.83	2268	52.59	2610	49.36	2527	53.23	7	16738565	16761849	-	Ppp5c	protein phosphatase 5%2C catalytic subunit [Source:MGI Symbol%3BAcc:MGI:102666]	GO:0006470:protein dephosphorylation;GO:0051291:protein heterooligomerization;GO:0043123:positive regulation of I-kappaB kinase/NF-kappaB signaling;GO:0043278:response to morphine;	GO:0005829:cytosol;GO:0043005:neuron projection;GO:0043025:neuronal cell body;GO:0005794:Golgi apparatus;GO:0005634:nucleus;	GO:0004871:signal transducer activity;GO:0046872:metal ion binding;GO:0042802:identical protein binding;GO:0004721:phosphoprotein phosphatase activity;	K04460	;ko04010 MAPK signaling pathway;
ENSMUSG00000003119	11730	1537	9.23	1289	9.12	1636	7.84	1522	9.44	2054	10.38	1592	8.97	11	98093885	98169330	+	Cdk12	cyclin-dependent kinase 12 [Source:MGI Symbol%3BAcc:MGI:1098802]	GO:0006397:mRNA processing;GO:0046777:protein autophosphorylation;GO:0008380:RNA splicing;GO:0043405:regulation of MAP kinase activity;GO:0070816:phosphorylation of RNA polymerase II C-terminal domain;	GO:0016607:nuclear speck;GO:0002944:cyclin K-CDK12 complex;GO:0019908:nuclear cyclin-dependent protein kinase holoenzyme complex;	GO:0004693:cyclin-dependent protein serine/threonine kinase activity;GO:0030332:cyclin binding;GO:0008353:RNA polymerase II carboxy-terminal domain kinase activity;GO:0005524:ATP binding;	K08819	-
ENSMUSG00000003123	5886	422	5.05	436	6.15	573	5.47	404	4.99	474	4.78	417	4.68	7	25078952	25098135	-	Lipe	lipase%2C hormone sensitive [Source:MGI Symbol%3BAcc:MGI:96790]	GO:0042758:long-chain fatty acid catabolic process;GO:0019433:triglyceride catabolic process;GO:0006363:termination of RNA polymerase I transcription;GO:0006361:transcription initiation from RNA polymerase I promoter;GO:0046340:diacylglycerol catabolic process;GO:0008203:cholesterol metabolic process;GO:0007565:female pregnancy;GO:0042493:response to drug;	GO:0005829:cytosol;GO:0005739:mitochondrion;GO:0005901:caveola;GO:0005615:extracellular space;GO:0005811:lipid particle;GO:0005634:nucleus;	GO:0042134:rRNA primary transcript binding;GO:0047372:acylglycerol lipase activity;GO:0033878:hormone-sensitive lipase activity;GO:0004806:triglyceride lipase activity;GO:0019901:protein kinase binding;	K07188	;ko04024 cAMP signaling pathway;ko04152 AMPK signaling pathway;ko04371 Apelin signaling pathway;ko04714 Thermogenesis;ko04910 Insulin signaling pathway;ko04923 Regulation of lipolysis in adipocytes;ko04925 Aldosterone synthesis and secretion;
ENSMUSG00000003131	8266	2759	23.51	2512	25.22	3681	25.03	2683	23.6	3587	25.73	3110	24.85	9	45874157	45923988	-	Pafah1b2	platelet-activating factor acetylhydrolase%2C isoform 1b%2C subunit 2 [Source:MGI Symbol%3BAcc:MGI:108415]	GO:0016042:lipid catabolic process;GO:0007420:brain development;GO:0007283:spermatogenesis;GO:0016239:positive regulation of macroautophagy;	GO:0005829:cytosol;GO:0005730:nucleolus;GO:0005886:plasma membrane;	GO:0003847:1-alkyl-2-acetylglycerophosphocholine esterase activity;GO:0046982:protein heterodimerization activity;GO:0042803:protein homodimerization activity;GO:0047179:platelet-activating factor acetyltransferase activity;	K16795	;ko00565 Ether lipid metabolism;ko01100 Metabolic pathways;
ENSMUSG00000003134	5239	6	0.08	8	0.13	9	0.1	11	0.15	5	0.06	17	0.21	1	39410573	39517836	-	Tbc1d8	TBC1 domain family%2C member 8 [Source:MGI Symbol%3BAcc:MGI:1927225]	-	GO:0005622:intracellular;	GO:0005509:calcium ion binding;	-	-
ENSMUSG00000003135	3508	770	15.46	688	16.28	985	15.78	753	15.61	903	15.27	826	15.55	1	39574073	39585970	+	Cnot11	CCR4-NOT transcription complex%2C subunit 11 [Source:MGI Symbol%3BAcc:MGI:106580]	GO:0008283:cell proliferation;GO:0000289:nuclear-transcribed mRNA poly(A) tail shortening;	GO:0030014:CCR4-NOT complex;GO:0005829:cytosol;	GO:0005515:protein binding;	-	-
ENSMUSG00000003153	7245	669	6.5	566	6.48	766	5.94	717	7.2	980	8.02	881	8.03	6	122704768	122778599	-	Slc2a3	solute carrier family 2 (facilitated glucose transporter)%2C member 3 [Source:MGI Symbol%3BAcc:MGI:95757]	GO:0055085:transmembrane transport;GO:0009749:response to glucose;GO:0070837:dehydroascorbic acid transport;GO:0046323:glucose import;GO:0043066:negative regulation of apoptotic process;	GO:0002080:acrosomal membrane;GO:0016021:integral component of membrane;GO:0005901:caveola;GO:0030672:synaptic vesicle membrane;	GO:0033300:dehydroascorbic acid transporter activity;GO:0019900:kinase binding;GO:0016936:galactoside binding;GO:0055056:D-glucose transmembrane transporter activity;GO:0005536:glucose binding;GO:0033222:xylose binding;	K08142	-
ENSMUSG00000003154	5346	211	2.78	186	2.89	272	2.86	289	3.93	332	3.68	284	3.51	6	122796873	122822325	+	Foxj2	forkhead box J2 [Source:MGI Symbol%3BAcc:MGI:1926805]	GO:0009888:tissue development;GO:0000122:negative regulation of transcription from RNA polymerase II promoter;GO:0048513:organ development;GO:0045893:positive regulation of transcription, DNA-templated;GO:0007389:pattern specification process;GO:0009790:embryo development;GO:0051090:regulation of sequence-specific DNA binding transcription factor activity;	GO:0005730:nucleolus;GO:0005667:transcription factor complex;	GO:0003690:double-stranded DNA binding;GO:0008301:DNA binding, bending;GO:0003705:RNA polymerase II distal enhancer sequence-specific DNA binding transcription factor activity;GO:0043565:sequence-specific DNA binding;GO:0019904:protein domain specific binding;GO:0008134:transcription factor binding;	K09403	-
ENSMUSG00000003161	4852	589	8.55	492	8.41	790	9.15	605	9.07	690	8.43	639	8.7	5	8096078	8119379	+	Sri	sorcin [Source:MGI Symbol%3BAcc:MGI:98419]	GO:0060315:negative regulation of ryanodine-sensitive calcium-release channel activity;GO:1901844:regulation of cell communication by electrical coupling involved in cardiac conduction;GO:0010459:negative regulation of heart rate;GO:1901077:regulation of relaxation of muscle;GO:0086004:regulation of cardiac muscle cell contraction;GO:1901385:regulation of voltage-gated calcium channel activity;	GO:0016529:sarcoplasmic reticulum;GO:0005829:cytosol;GO:0030018:Z disc;GO:0031982:vesicle;GO:0005789:endoplasmic reticulum membrane;GO:0005886:plasma membrane;	GO:0005509:calcium ion binding;GO:0002020:protease binding;GO:0046982:protein heterodimerization activity;	-	-
ENSMUSG00000003166	6853	739	7.6	599	7.25	939	7.7	784	8.32	867	7.5	841	8.11	16	17657346	17716426	-	Dgcr2	DiGeorge syndrome critical region gene 2 [Source:MGI Symbol%3BAcc:MGI:892866]	GO:0007155:cell adhesion;GO:0042493:response to drug;	GO:0016021:integral component of membrane;	GO:0030246:carbohydrate binding;	-	-
ENSMUSG00000003184	3442	573	11.73	500	12.06	843	13.77	642	13.56	656	11.3	689	13.22	7	44647072	44652272	+	Irf3	interferon regulatory factor 3 [Source:MGI Symbol%3BAcc:MGI:1859179]	GO:0000122:negative regulation of transcription from RNA polymerase II promoter;GO:0071359:cellular response to dsRNA;GO:0060340:positive regulation of type I interferon-mediated signaling pathway;GO:0050715:positive regulation of cytokine secretion;GO:0031663:lipopolysaccharide-mediated signaling pathway;GO:0045358:negative regulation of interferon-beta biosynthetic process;GO:0032728:positive r…	GO:0005737:cytoplasm;GO:0005634:nucleus;	GO:0044212:transcription regulatory region DNA binding;GO:0003700:sequence-specific DNA binding transcription factor activity;GO:0042803:protein homodimerization activity;	K05411	;ko04620 Toll-like receptor signaling pathway;ko04621 NOD-like receptor signaling pathway;ko04622 RIG-I-like receptor signaling pathway;ko04623 Cytosolic DNA-sensing pathway;ko05131 Shigellosis;ko05133 Pertussis;ko05135 Yersinia infection;ko05160 Hepatitis C;ko05161 Hepatitis B;ko05162 Measles;ko05163 Human cytomegalovirus infection;ko05164 Influenza A;ko05165 Human papillomavirus infection;ko051…
ENSMUSG00000003190	1976	100	3.56	81	3.4	112	3.19	91	3.35	119	3.57	106	3.54	7	44640646	44648136	-	Bcl2l12	BCL2-like 12 (proline rich) [Source:MGI Symbol%3BAcc:MGI:1922986]	GO:0042981:regulation of apoptotic process;	-	-	-	-
ENSMUSG00000003198	2448	132	3.8	116	3.93	160	3.67	123	3.65	145	3.51	143	3.86	17	56199093	56205928	+	Zfp959	zinc finger protein 959 [Source:MGI Symbol%3BAcc:MGI:2385058]	-	-	GO:0046872:metal ion binding;	K09228	;ko05168 Herpes simplex virus 1 infection;
ENSMUSG00000003199	2305	812	24.81	744	26.79	1101	26.85	814	25.68	1042	26.81	922	26.42	17	56312711	56323790	+	Mpnd	MPN domain containing [Source:MGI Symbol%3BAcc:MGI:1915297]	GO:0051603:proteolysis involved in cellular protein catabolic process;GO:0006508:proteolysis;	GO:0005737:cytoplasm;GO:0005839:proteasome core complex;GO:0005634:nucleus;	GO:0004298:threonine-type endopeptidase activity;GO:0008233:peptidase activity;	-	-
ENSMUSG00000003200	5012	646	9.08	589	9.75	887	9.95	697	10.11	781	9.24	716	9.44	17	56323750	56343635	-	Sh3gl1	SH3-domain GRB2-like 1 [Source:MGI Symbol%3BAcc:MGI:700010]	GO:0006897:endocytosis;	GO:0016020:membrane;GO:0005768:endosome;	GO:0005515:protein binding;GO:0008289:lipid binding;	K11247	;ko04144 Endocytosis;
ENSMUSG00000003206	1154	172	10.5	152	10.93	233	11.35	129	8.13	204	10.48	173	9.9	17	56259640	56264022	+	Ebi3	Epstein-Barr virus induced gene 3 [Source:MGI Symbol%3BAcc:MGI:1354171]	GO:0019221:cytokine-mediated signaling pathway;	GO:0005615:extracellular space;GO:0016020:membrane;	GO:0004896:cytokine receptor activity;GO:0005125:cytokine activity;GO:0045523:interleukin-27 receptor binding;	-	-
ENSMUSG00000003208	4956	239	3.4	219	3.67	385	4.37	257	3.77	356	4.26	304	4.05	17	56266099	56275285	+	Yju2	YJU2 splicing factor [Source:MGI Symbol%3BAcc:MGI:1920136]	-	-	-	-	-
ENSMUSG00000003226	11728	8120	48.77	6025	42.63	8143	39.03	6859	42.53	9211	46.58	7420	41.79	10	58282742	58330178	+	Ranbp2	RAN binding protein 2 [Source:MGI Symbol%3BAcc:MGI:894323]	GO:0006457:protein folding;GO:0016925:protein sumoylation;GO:0046907:intracellular transport;GO:0015031:protein transport;GO:0051028:mRNA transport;	GO:0042405:nuclear inclusion body;GO:0031965:nuclear membrane;GO:0044615:nuclear pore nuclear basket;	GO:0008270:zinc ion binding;GO:0016874:ligase activity;GO:0003755:peptidyl-prolyl cis-trans isomerase activity;GO:0005515:protein binding;	K12172	;ko03013 RNA transport;ko05014 Amyotrophic lateral sclerosis;
ENSMUSG00000003227	3637	0	0	0	0	0	0	0	0	0	0	0	0	10	58436611	58511476	-	Edar	ectodysplasin-A receptor [Source:MGI Symbol%3BAcc:MGI:1343498]	GO:0042475:odontogenesis of dentin-containing tooth;GO:0043473:pigmentation;GO:0006915:apoptotic process;GO:0030154:cell differentiation;GO:0060662:salivary gland cavitation;GO:0001942:hair follicle development;GO:0042346:positive regulation of NF-kappaB import into nucleus;	GO:0016021:integral component of membrane;GO:0045177:apical part of cell;GO:0005886:plasma membrane;	GO:0004872:receptor activity;	K05162	;ko04060 Cytokine-cytokine receptor interaction;ko04064 NF-kappa B signaling pathway;
ENSMUSG00000003228	7055	112	1.12	106	1.25	123	0.98	114	1.17	161	1.35	87	0.81	19	60878187	61084406	+	Grk5	G protein-coupled receptor kinase 5 [Source:MGI Symbol%3BAcc:MGI:109161]	GO:0046777:protein autophosphorylation;GO:0016055:Wnt signaling pathway;GO:0002029:desensitization of G-protein coupled receptor protein signaling pathway;GO:0007217:tachykinin receptor signaling pathway;GO:0038032:termination of G-protein coupled receptor signaling pathway;GO:0042493:response to drug;GO:0043066:negative regulation of apoptotic process;	GO:0005737:cytoplasm;GO:0005634:nucleus;GO:0005886:plasma membrane;	GO:0004703:G-protein coupled receptor kinase activity;GO:0008289:lipid binding;GO:0005524:ATP binding;	K08291	;ko04062 Chemokine signaling pathway;ko04144 Endocytosis;ko04341 Hedgehog signaling pathway - fly;ko05032 Morphine addiction;
ENSMUSG00000003233	6410	445	4.89	369	4.78	565	4.95	424	4.81	581	5.38	418	4.31	16	20335732	20352760	+	Dvl3	dishevelled segment polarity protein 3 [Source:MGI Symbol%3BAcc:MGI:108100]	-	-	-	K02353	;ko04150 mTOR signaling pathway;ko04310 Wnt signaling pathway;ko04330 Notch signaling pathway;ko04390 Hippo signaling pathway;ko04550 Signaling pathways regulating pluripotency of stem cells;ko04916 Melanogenesis;ko04934 Cushing syndrome;ko05010 Alzheimer disease;ko05022 Pathways of neurodegeneration - multiple diseases;ko05165 Human papillomavirus infection;ko05200 Pathways in cancer;ko05217 Bas…
ENSMUSG00000003234	3558	655	12.97	528	12.32	843	13.32	614	12.55	804	13.4	701	13.01	16	20367327	20380129	+	Abcf3	ATP-binding cassette%2C sub-family F (GCN20)%2C member 3 [Source:MGI Symbol%3BAcc:MGI:1351656]	GO:0051607:defense response to virus;	-	GO:0016887:ATPase activity;GO:0005515:protein binding;GO:0005524:ATP binding;GO:0017111:nucleoside-triphosphatase activity;GO:0000166:nucleotide binding;	K06158	-
ENSMUSG00000003235	2595	1632	44.3	1449	46.34	2248	48.69	1636	45.84	1982	45.3	1783	45.39	16	20317567	20328073	+	Eif2b5	eukaryotic translation initiation factor 2B%2C subunit 5 epsilon [Source:MGI Symbol%3BAcc:MGI:2446176]	GO:0009749:response to glucose;GO:0001541:ovarian follicle development;GO:0014003:oligodendrocyte development;GO:0032057:negative regulation of translational initiation in response to stress;GO:0045948:positive regulation of translational initiation;GO:0016070:RNA metabolic process;GO:0043434:response to peptide hormone;GO:0050790:regulation of catalytic activity;GO:0009408:response to heat;GO:00…	GO:0005634:nucleus;GO:0005851:eukaryotic translation initiation factor 2B complex;	GO:0016740:transferase activity;GO:0003743:translation initiation factor activity;GO:0031369:translation initiation factor binding;GO:0005085:guanyl-nucleotide exchange factor activity;	K03240	;ko03013 RNA transport;ko05168 Herpes simplex virus 1 infection;
ENSMUSG00000003269	3445	488	9.98	389	9.37	672	10.96	462	9.75	526	9.05	452	8.67	7	45456061	45464005	-	Cyth2	cytohesin 2 [Source:MGI Symbol%3BAcc:MGI:1334255]	GO:0032012:regulation of ARF protein signal transduction;GO:0030155:regulation of cell adhesion;	GO:0005737:cytoplasm;GO:0005886:plasma membrane;	GO:0005543:phospholipid binding;GO:0005086:ARF guanyl-nucleotide exchange factor activity;GO:0005515:protein binding;	K18441	;ko04072 Phospholipase D signaling pathway;ko04144 Endocytosis;ko05130 Pathogenic Escherichia coli infection;ko05131 Shigellosis;ko05132 Salmonella infection;
ENSMUSG00000003271	3950	2	0.04	2	0.04	4	0.06	3	0.06	4	0.06	6	0.1	7	45379407	45434093	-	Sult2b1	sulfotransferase family%2C cytosolic%2C 2B%2C member 1 [Source:MGI Symbol%3BAcc:MGI:1926342]	GO:0000103:sulfate assimilation;GO:0008202:steroid metabolic process;	GO:0005783:endoplasmic reticulum;GO:0005737:cytoplasm;GO:0043231:intracellular membrane-bounded organelle;	GO:0050294:steroid sulfotransferase activity;GO:0004027:alcohol sulfotransferase activity;	K01015	;ko00140 Steroid hormone biosynthesis;
ENSMUSG00000003273	1926	0	0	3	0.13	1	0.03	0	0	0	0	0	0	7	45349267	45354106	+	Car11	carbonic anhydrase 11 [Source:MGI Symbol%3BAcc:MGI:1336193]	-	GO:0005576:extracellular region;GO:0016323:basolateral plasma membrane;	GO:0004089:carbonate dehydratase activity;	-	-
ENSMUSG00000003279	17890	1	0	1	0	0	0	2	0.01	4	0.01	2	0.01	17	70276068	71128408	+	Dlgap1	DLG associated protein 1 [Source:MGI Symbol%3BAcc:MGI:1346065]	GO:0035418:protein localization to synapse;GO:0061136:regulation of proteasomal protein catabolic process;GO:0007268:synaptic transmission;GO:0070842:aggresome assembly;	GO:0030054:cell junction;GO:0045211:postsynaptic membrane;GO:0014069:postsynaptic density;GO:0005886:plasma membrane;	GO:0032403:protein complex binding;GO:0019904:protein domain specific binding;	K15008	;ko04724 Glutamatergic synapse;
ENSMUSG00000003282	8487	13	0.11	15	0.15	14	0.09	15	0.13	27	0.19	14	0.11	4	3900996	3938423	-	Plag1	pleiomorphic adenoma gene 1 [Source:MGI Symbol%3BAcc:MGI:1891916]	GO:0022612:gland morphogenesis;GO:0006355:regulation of transcription, DNA-templated;GO:0060252:positive regulation of glial cell proliferation;GO:0035264:multicellular organism growth;GO:0035265:organ growth;GO:0010629:negative regulation of gene expression;GO:0010628:positive regulation of gene expression;GO:0060736:prostate gland growth;GO:0006357:regulation of transcription from RNA polymeras…	GO:0005634:nucleus;	GO:0008270:zinc ion binding;GO:0000981:sequence-specific DNA binding RNA polymerase II transcription factor activity;GO:0003677:DNA binding;	K19484	-
ENSMUSG00000003283	2092	143	4.81	130	5.16	166	4.46	111	3.86	128	3.63	132	4.17	2	152950388	152993361	+	Hck	hemopoietic cell kinase [Source:MGI Symbol%3BAcc:MGI:96052]	GO:0008360:regulation of cell shape;GO:0043066:negative regulation of apoptotic process;GO:0071801:regulation of podosome assembly;GO:0006887:exocytosis;GO:0046777:protein autophosphorylation;GO:0008284:positive regulation of cell proliferation;GO:0051090:regulation of sequence-specific DNA binding transcription factor activity;GO:0018108:peptidyl-tyrosine phosphorylation;GO:0006954:inflammatory …	GO:0005925:focal adhesion;GO:0030133:transport vesicle;GO:0005884:actin filament;GO:0031234:extrinsic component of cytoplasmic side of plasma membrane;GO:0005764:lysosome;GO:0005794:Golgi apparatus;GO:0005829:cytosol;GO:0042995:cell projection;GO:0005901:caveola;GO:0005634:nucleus;	GO:0004715:non-membrane spanning protein tyrosine kinase activity;GO:0005524:ATP binding;	K08893	;ko04062 Chemokine signaling pathway;ko04666 Fc gamma R-mediated phagocytosis;ko05167 Kaposi sarcoma-associated herpesvirus infection;
ENSMUSG00000003299	2617	923	24.84	847	26.86	1335	28.67	910	25.29	1147	25.99	1014	25.59	9	20914034	20920135	+	Mrpl4	mitochondrial ribosomal protein L4 [Source:MGI Symbol%3BAcc:MGI:2137210]	GO:0006412:translation;	GO:0005840:ribosome;GO:0005739:mitochondrion;	GO:0003735:structural constituent of ribosome;	K02926	;ko03010 Ribosome;
ENSMUSG00000003308	4693	1491	22.38	1269	22.44	1939	23.22	1445	22.39	1721	21.75	1551	21.83	9	21141026	21150657	-	Keap1	kelch-like ECH-associated protein 1 [Source:MGI Symbol%3BAcc:MGI:1858732]	GO:0071353:cellular response to interleukin-4;GO:0042994:cytoplasmic sequestering of transcription factor;GO:0010629:negative regulation of gene expression;GO:0006355:regulation of transcription, DNA-templated;GO:0010499:proteasomal ubiquitin-independent protein catabolic process;GO:0051259:protein oligomerization;GO:0016567:protein ubiquitination;GO:0045604:regulation of epidermal cell different…	GO:0005925:focal adhesion;GO:0005913:cell-cell adherens junction;GO:0030496:midbody;GO:0005783:endoplasmic reticulum;GO:0005634:nucleus;GO:0031463:Cul3-RING ubiquitin ligase complex;	GO:0005515:protein binding;	K10456	;ko04120 Ubiquitin mediated proteolysis;ko05200 Pathways in cancer;ko05225 Hepatocellular carcinoma;ko05418 Fluid shear stress and atherosclerosis;
ENSMUSG00000003309	3140	0	0	4	0.11	7	0.13	5	0.12	7	0.13	6	0.13	9	21205571	21223633	-	Ap1m2	adaptor protein complex AP-1%2C mu 2 subunit [Source:MGI Symbol%3BAcc:MGI:1336974]	GO:0016192:vesicle-mediated transport;GO:0006886:intracellular protein transport;	GO:0005794:Golgi apparatus;GO:0031410:cytoplasmic vesicle;GO:0030131:clathrin adaptor complex;GO:0005802:trans-Golgi network;	-	K12393	;ko04142 Lysosome;ko05170 Human immunodeficiency virus 1 infection;
ENSMUSG00000003316	7090	4717	46.86	3750	43.89	5477	43.42	3921	40.21	5011	41.91	4276	39.84	8	111881053	111985848	-	Glg1	golgi apparatus protein 1 [Source:MGI Symbol%3BAcc:MGI:104967]	GO:0030512:negative regulation of transforming growth factor beta receptor signaling pathway;GO:0010955:negative regulation of protein processing;GO:0032330:regulation of chondrocyte differentiation;GO:0060349:bone morphogenesis;	GO:0005797:Golgi medial cisterna;GO:0016021:integral component of membrane;GO:0000139:Golgi membrane;GO:0031012:extracellular matrix;GO:0005886:plasma membrane;	GO:0017134:fibroblast growth factor binding;	K06816	;ko04514 Cell adhesion molecules;
ENSMUSG00000003341	4713	2	0.03	0	0	3	0.04	3	0.05	2	0.03	2	0.03	10	80355418	80374958	-	Atp8b3	ATPase%2C class I%2C type 8B%2C member 3 [Source:MGI Symbol%3BAcc:MGI:1914581]	GO:0045332:phospholipid translocation;GO:0007339:binding of sperm to zona pellucida;	GO:0001669:acrosomal vesicle;GO:0016021:integral component of membrane;	GO:0004012:phospholipid-translocating ATPase activity;GO:0005524:ATP binding;	K01530	-
ENSMUSG00000003344	3586	204	4.01	201	4.65	319	5	239	4.85	245	4.05	226	4.16	10	80478451	80492905	-	Btbd2	BTB (POZ) domain containing 2 [Source:MGI Symbol%3BAcc:MGI:1933831]	-	-	-	K10477	-
ENSMUSG00000003345	4835	1740	25.35	1474	25.3	2338	27.18	1599	24.05	1893	23.22	1691	23.1	10	80458672	80476583	+	Csnk1g2	casein kinase 1%2C gamma 2 [Source:MGI Symbol%3BAcc:MGI:1920014]	GO:0046777:protein autophosphorylation;GO:0016055:Wnt signaling pathway;	GO:0005737:cytoplasm;	GO:0042277:peptide binding;GO:0004674:protein serine/threonine kinase activity;GO:0001948:glycoprotein binding;GO:0005524:ATP binding;GO:0000287:magnesium ion binding;GO:0051219:phosphoprotein binding;	K08958	;ko04340 Hedgehog signaling pathway;ko04341 Hedgehog signaling pathway - fly;
ENSMUSG00000003346	1547	617	28.09	547	29.34	839	30.49	541	25.43	732	28.06	596	25.45	10	80419488	80426175	-	Abhd17a	abhydrolase domain containing 17A [Source:MGI Symbol%3BAcc:MGI:106388]	-	GO:0005576:extracellular region;	GO:0016787:hydrolase activity;	-	-
ENSMUSG00000003348	3254	373	8.07	308	7.85	514	8.88	344	7.69	457	8.33	371	7.53	10	80521087	80537811	-	Mob3a	MOB kinase activator 3A [Source:MGI Symbol%3BAcc:MGI:3050117]	-	GO:0005622:intracellular;	GO:0016301:kinase activity;GO:0046872:metal ion binding;	-	-
ENSMUSG00000003352	4010	4	0.07	3	0.06	4	0.06	5	0.09	0	0	2	0.03	15	98528721	98542410	+	Cacnb3	calcium channel%2C voltage-dependent%2C beta 3 subunit [Source:MGI Symbol%3BAcc:MGI:103307]	GO:0034765:regulation of ion transmembrane transport;GO:0070588:calcium ion transmembrane transport;GO:0050852:T cell receptor signaling pathway;	GO:0016324:apical plasma membrane;GO:0005891:voltage-gated calcium channel complex;	GO:0019901:protein kinase binding;GO:0008331:high voltage-gated calcium channel activity;	K04864	;ko04010 MAPK signaling pathway;ko04260 Cardiac muscle contraction;ko04261 Adrenergic signaling in cardiomyocytes;ko04921 Oxytocin signaling pathway;ko05410 Hypertrophic cardiomyopathy;ko05412 Arrhythmogenic right ventricular cardiomyopathy;ko05414 Dilated cardiomyopathy;
ENSMUSG00000003354	1992	12	0.42	26	1.08	25	0.71	10	0.37	9	0.27	12	0.4	15	98606088	98621217	+	Ccdc65	coiled-coil domain containing 65 [Source:MGI Symbol%3BAcc:MGI:2146001]	-	-	-	-	-
ENSMUSG00000003355	2706	657	17.1	577	17.7	919	19.09	589	15.83	648	14.2	614	14.99	15	98622247	98626079	-	Fkbp11	FK506 binding protein 11 [Source:MGI Symbol%3BAcc:MGI:1913370]	GO:0006457:protein folding;GO:0000413:protein peptidyl-prolyl isomerization;	GO:0016021:integral component of membrane;	GO:0003755:peptidyl-prolyl cis-trans isomerase activity;GO:0005528:FK506 binding;	K09576	-
ENSMUSG00000003360	6229	2571	29.07	2171	28.92	3379	30.49	2475	28.89	2967	28.25	2624	27.83	15	98543015	98560775	-	Ddx23	DEAD box helicase 23 [Source:MGI Symbol%3BAcc:MGI:1921601]	-	-	-	K12858	;ko03040 Spliceosome;
ENSMUSG00000003363	2924	665	16.02	521	14.79	879	16.9	817	20.32	953	19.33	807	18.23	7	27231425	27252643	-	Pld3	phospholipase D family%2C member 3 [Source:MGI Symbol%3BAcc:MGI:1333782]	GO:0016042:lipid catabolic process;	GO:0005789:endoplasmic reticulum membrane;GO:0016021:integral component of membrane;GO:0005783:endoplasmic reticulum;	GO:0070290:N-acylphosphatidylethanolamine-specific phospholipase D activity;GO:0004630:phospholipase D activity;	K16860	;ko00564 Glycerophospholipid metabolism;ko00565 Ether lipid metabolism;ko01100 Metabolic pathways;ko01110 Biosynthesis of secondary metabolites;
ENSMUSG00000003378	5168	7	0.1	13	0.21	31	0.34	23	0.32	24	0.28	18	0.23	7	24709274	24771771	-	Grik5	glutamate receptor%2C ionotropic%2C kainate 5 (gamma 2) [Source:MGI Symbol%3BAcc:MGI:95818]	GO:0071333:cellular response to glucose stimulus;GO:0060079:regulation of excitatory postsynaptic membrane potential;GO:0035249:synaptic transmission, glutamatergic;GO:0031630:regulation of synaptic vesicle fusion to presynaptic membrane;GO:0035235:ionotropic glutamate receptor signaling pathway;GO:0043525:positive regulation of neuron apoptotic process;GO:0006621:protein retention in ER lumen;GO…	GO:0042734:presynaptic membrane;GO:0045211:postsynaptic membrane;GO:0014069:postsynaptic density;GO:0032983:kainate selective glutamate receptor complex;GO:0030054:cell junction;GO:0043195:terminal bouton;GO:0043204:perikaryon;GO:0030288:outer membrane-bounded periplasmic space;	GO:0030165:PDZ domain binding;GO:0015277:kainate selective glutamate receptor activity;GO:0042802:identical protein binding;GO:0005234:extracellular-glutamate-gated ion channel activity;GO:0017124:SH3 domain binding;	K05205	;ko04080 Neuroactive ligand-receptor interaction;ko04724 Glutamatergic synapse;
ENSMUSG00000003379	1457	2	0.1	3	0.17	5	0.19	1	0.05	4	0.16	3	0.14	7	24596806	24601622	+	Cd79a	CD79A antigen (immunoglobulin-associated alpha) [Source:MGI Symbol%3BAcc:MGI:101774]	GO:0050853:B cell receptor signaling pathway;GO:0030183:B cell differentiation;GO:0042100:B cell proliferation;	GO:0019815:B cell receptor complex;GO:0009897:external side of plasma membrane;GO:0005771:multivesicular body;GO:0016021:integral component of membrane;GO:0045121:membrane raft;	GO:0004888:transmembrane signaling receptor activity;GO:0005515:protein binding;	K06506	;ko04662 B cell receptor signaling pathway;ko05340 Primary immunodeficiency;
ENSMUSG00000003380	1523	457	21.13	392	21.36	626	23.1	486	23.2	496	19.31	472	20.47	7	24669177	24672179	-	Rabac1	Rab acceptor 1 (prenylated) [Source:MGI Symbol%3BAcc:MGI:1201692]	GO:0016192:vesicle-mediated transport;	GO:0005794:Golgi apparatus;GO:0030054:cell junction;GO:0005886:plasma membrane;GO:0008021:synaptic vesicle;GO:0016021:integral component of membrane;	GO:0070064:proline-rich region binding;GO:0042802:identical protein binding;GO:0030674:protein binding, bridging;GO:0008022:protein C-terminus binding;	-	-
ENSMUSG00000003382	10274	1538	10.54	1251	10.1	1851	10.13	1592	11.27	2185	12.61	1649	10.6	3	87432714	87447463	+	Etv3	ets variant 3 [Source:MGI Symbol%3BAcc:MGI:1350926]	GO:0000122:negative regulation of transcription from RNA polymerase II promoter;	GO:0017053:transcriptional repressor complex;	GO:0043565:sequence-specific DNA binding;GO:0003700:sequence-specific DNA binding transcription factor activity;GO:0005515:protein binding;	K09433	-
ENSMUSG00000003402	4275	2047	33.73	1861	36.13	2737	35.99	1962	33.37	2372	32.91	2136	33	9	21914102	21925518	+	Prkcsh	protein kinase C substrate 80K-H [Source:MGI Symbol%3BAcc:MGI:107877]	GO:0051291:protein heterooligomerization;GO:0006491:N-glycan processing;GO:0001889:liver development;GO:0072001:renal system development;GO:0006807:nitrogen compound metabolic process;GO:0016310:phosphorylation;GO:0010977:negative regulation of neuron projection development;GO:0001701:in utero embryonic development;	GO:0017177:glucosidase II complex;GO:0005886:plasma membrane;	GO:0005080:protein kinase C binding;GO:0003723:RNA binding;GO:0005509:calcium ion binding;GO:0016301:kinase activity;	K08288	;ko04141 Protein processing in endoplasmic reticulum;
ENSMUSG00000003410	6890	1	0.01	1	0.01	0	0	0	0	0	0	0	0	9	21926301	21963319	-	Elavl3	ELAV like RNA binding protein 3 [Source:MGI Symbol%3BAcc:MGI:109157]	GO:0030154:cell differentiation;GO:0007399:nervous system development;	-	GO:0017091:AU-rich element binding;GO:0000166:nucleotide binding;	K13208	-
ENSMUSG00000003411	3524	0	0	0	0	1	0.02	0	0	0	0	0	0	4	108736260	108800521	+	Rab3b	RAB3B%2C member RAS oncogene family [Source:MGI Symbol%3BAcc:MGI:1917158]	GO:0007264:small GTPase mediated signal transduction;GO:0017157:regulation of exocytosis;GO:0018125:peptidyl-cysteine methylation;GO:0015031:protein transport;	GO:0005829:cytosol;GO:0030141:secretory granule;GO:0008021:synaptic vesicle;GO:0005886:plasma membrane;	GO:0005515:protein binding;GO:0005525:GTP binding;	K06108	-
ENSMUSG00000003418	7664	0	0	0	0	0	0	0	0	0	0	0	0	2	13655832	13798875	-	St8sia6	ST8 alpha-N-acetyl-neuraminide alpha-2%2C8-sialyltransferase 6 [Source:MGI Symbol%3BAcc:MGI:2386797]	GO:0016051:carbohydrate biosynthetic process;GO:0001574:ganglioside biosynthetic process;GO:0009311:oligosaccharide metabolic process;GO:0006493:protein O-linked glycosylation;	GO:0030173:integral component of Golgi membrane;	GO:0008373:sialyltransferase activity;	K06615	-
ENSMUSG00000003420	2102	42	1.41	32	1.26	55	1.47	35	1.21	42	1.18	42	1.32	7	44742414	44753275	-	Fcgrt	Fc fragment of IgG receptor and transporter [Source:MGI Symbol%3BAcc:MGI:103017]	GO:0006955:immune response;GO:0019882:antigen processing and presentation;	GO:0016021:integral component of membrane;GO:0042612:MHC class I protein complex;	GO:0030881:beta-2-microglobulin binding;GO:0019864:IgG binding;	-	-
ENSMUSG00000003421	2800	872	21.94	737	21.84	1114	22.36	768	19.94	954	20.21	849	20.03	7	44711853	44727634	+	Nosip	nitric oxide synthase interacting protein [Source:MGI Symbol%3BAcc:MGI:1913644]	GO:0051001:negative regulation of nitric-oxide synthase activity;	GO:0005737:cytoplasm;GO:0005634:nucleus;	-	K13125	-
ENSMUSG00000003423	2020	517	18.03	415	17.05	718	19.98	449	16.16	566	16.62	533	17.43	7	44803727	44809489	+	Pih1d1	PIH1 domain containing 1 [Source:MGI Symbol%3BAcc:MGI:1916095]	GO:0000492:box C/D snoRNP assembly;	GO:0070761:pre-snoRNP complex;	-	-	-
ENSMUSG00000003429	865	9372	763.13	8186	785.35	12911	838.99	8762	736.57	10746	736.74	10185	777.77	7	44771803	44773863	-	Rps11	ribosomal protein S11 [Source:MGI Symbol%3BAcc:MGI:1351329]	GO:0006413:translational initiation;GO:0019083:viral transcription;GO:0006414:translational elongation;GO:0006415:translational termination;GO:0006614:SRP-dependent cotranslational protein targeting to membrane;GO:0000184:nuclear-transcribed mRNA catabolic process, nonsense-mediated decay;	GO:0022627:cytosolic small ribosomal subunit;	GO:0019843:rRNA binding;GO:0003735:structural constituent of ribosome;	K02949	;ko03010 Ribosome;ko05171 Coronavirus disease - COVID-19;
ENSMUSG00000003435	5764	2498	30.52	1952	28.1	3187	31.08	2373	29.94	2903	29.87	2543	29.14	7	28014316	28038171	-	Supt5	suppressor of Ty 5%2C DSIF elongation factor subunit [Source:MGI Symbol%3BAcc:MGI:1202400]	GO:0000122:negative regulation of transcription from RNA polymerase II promoter;GO:0032785:negative regulation of DNA-templated transcription, elongation;GO:0032968:positive regulation of transcription elongation from RNA polymerase II promoter;GO:0016239:positive regulation of macroautophagy;GO:0045944:positive regulation of transcription from RNA polymerase II promoter;	GO:0032044:DSIF complex;	GO:0046982:protein heterodimerization activity;GO:0003682:chromatin binding;GO:0019899:enzyme binding;	K15172	-
ENSMUSG00000003436	2850	2	0.05	0	0	0	0	1	0.03	0	0	1	0.02	7	27992978	28001663	-	Dll3	delta like canonical Notch ligand 3 [Source:MGI Symbol%3BAcc:MGI:1096877]	GO:0001709:cell fate determination;GO:0048712:negative regulation of astrocyte differentiation;GO:0050769:positive regulation of neurogenesis;GO:0001501:skeletal system development;GO:0007386:compartment pattern specification;GO:0045746:negative regulation of Notch signaling pathway;GO:0048339:paraxial mesoderm development;GO:0001756:somitogenesis;GO:0001701:in utero embryonic development;	GO:0016021:integral component of membrane;	GO:0005112:Notch binding;	K06051	;ko01522 Endocrine resistance;ko04330 Notch signaling pathway;ko04658 Th1 and Th2 cell differentiation;ko05200 Pathways in cancer;ko05224 Breast cancer;
ENSMUSG00000003437	3438	1194	24.46	1046	25.25	1519	24.84	1175	24.85	1331	22.96	1229	23.61	7	28092376	28098813	+	Paf1	Paf1%2C RNA polymerase II complex component [Source:MGI Symbol%3BAcc:MGI:1923988]	GO:0001711:endodermal cell fate commitment;GO:0000122:negative regulation of transcription from RNA polymerase II promoter;GO:0010390:histone monoubiquitination;GO:0045638:negative regulation of myeloid cell differentiation;GO:0031442:positive regulation of mRNA 3'-end processing;GO:0016055:Wnt signaling pathway;GO:0032968:positive regulation of transcription elongation from RNA polymerase II pro…	GO:0016593:Cdc73/Paf1 complex;GO:0005730:nucleolus;GO:0005739:mitochondrion;	GO:0000993:RNA polymerase II core binding;GO:0003682:chromatin binding;	K15174	;ko04011 MAPK signaling pathway - yeast;
ENSMUSG00000003438	2684	1178	30.91	944	29.19	1574	32.96	1127	30.53	1323	29.23	1171	28.82	7	28004941	28011497	-	Timm50	translocase of inner mitochondrial membrane 50 [Source:MGI Symbol%3BAcc:MGI:1913775]	GO:0001836:release of cytochrome c from mitochondria;GO:0035335:peptidyl-tyrosine dephosphorylation;GO:0007006:mitochondrial membrane organization;GO:0015031:protein transport;	GO:0016021:integral component of membrane;GO:0005744:mitochondrial inner membrane presequence translocase complex;GO:0016607:nuclear speck;	GO:0043021:ribonucleoprotein complex binding;GO:0004722:protein serine/threonine phosphatase activity;GO:0004725:protein tyrosine phosphatase activity;GO:0005134:interleukin-2 receptor binding;	K17496	-
ENSMUSG00000003444	1281	222	12.21	188	12.18	271	11.89	216	12.26	264	12.22	221	11.4	7	28085571	28092133	-	Med29	mediator complex subunit 29 [Source:MGI Symbol%3BAcc:MGI:1914474]	GO:0006355:regulation of transcription, DNA-templated;	GO:0016592:mediator complex;	GO:0005515:protein binding;	K15142	-
ENSMUSG00000003452	27373	1	0	1	0	1	0	5	0.01	0	0	0	0	6	149310384	149464827	+	Bicd1	BICD cargo adaptor 1 [Source:MGI Symbol%3BAcc:MGI:1101760]	GO:0016032:viral process;GO:1900275:negative regulation of phospholipase C activity;GO:0034063:stress granule assembly;GO:0072393:microtubule anchoring at microtubule organizing center;GO:1900276:regulation of proteinase activated receptor activity;GO:1900737:negative regulation of phospholipase C-activating G-protein coupled receptor signaling pathway;GO:0048260:positive regulation of receptor-m…	GO:0005802:trans-Golgi network;GO:0016020:membrane;GO:0005794:Golgi apparatus;GO:0005829:cytosol;GO:0031410:cytoplasmic vesicle;GO:0072517:host cell viral assembly compartment;GO:0048471:perinuclear region of cytoplasm;	GO:0045502:dynein binding;GO:0017137:Rab GTPase binding;GO:0034452:dynactin binding;GO:0031871:proteinase activated receptor binding;GO:0008093:cytoskeletal adaptor activity;	K18739	-
ENSMUSG00000003458	3975	1139	20.18	991	20.69	1422	20.11	1128	20.63	1312	19.57	1207	20.06	1	171893580	171910362	-	Ncstn	nicastrin [Source:MGI Symbol%3BAcc:MGI:1891700]	GO:0006509:membrane protein ectodomain proteolysis;GO:0002262:myeloid cell homeostasis;GO:0007219:Notch signaling pathway;GO:0050435:beta-amyloid metabolic process;GO:0042098:T cell proliferation;GO:0016485:protein processing;GO:0050673:epithelial cell proliferation;GO:0043085:positive regulation of catalytic activity;	GO:0005765:lysosomal membrane;GO:0005794:Golgi apparatus;GO:0005783:endoplasmic reticulum;GO:0005887:integral component of plasma membrane;	GO:0004175:endopeptidase activity;GO:0005515:protein binding;	K06171	;ko04330 Notch signaling pathway;ko05010 Alzheimer disease;
ENSMUSG00000003464	3815	839	15.49	643	13.99	1031	15.19	730	13.91	899	13.97	819	14.18	1	171954322	171964060	+	Pex19	peroxisomal biogenesis factor 19 [Source:MGI Symbol%3BAcc:MGI:1334458]	GO:0016559:peroxisome fission;GO:0072321:chaperone-mediated protein transport;GO:1900131:negative regulation of lipid binding;GO:0050821:protein stabilization;GO:0045046:protein import into peroxisome membrane;GO:0061077:chaperone-mediated protein folding;GO:0016557:peroxisome membrane biogenesis;	GO:0005829:cytosol;GO:0043234:protein complex;GO:0016021:integral component of membrane;GO:0031526:brush border membrane;GO:0005778:peroxisomal membrane;GO:0005634:nucleus;	GO:0047485:protein N-terminus binding;GO:0036105:peroxisome membrane class-1 targeting sequence binding;GO:0051117:ATPase binding;	K13337	;ko04146 Peroxisome;
ENSMUSG00000003469	2910	0	0	0	0	2	0.04	3	0.07	1	0.02	1	0.02	14	70694916	70706272	+	Phyhip	phytanoyl-CoA hydroxylase interacting protein [Source:MGI Symbol%3BAcc:MGI:1860417]	-	-	-	-	-
ENSMUSG00000003476	5115	0	0	0	0	0	0	0	0	0	0	0	0	6	55067034	55110001	-	Crhr2	corticotropin releasing hormone receptor 2 [Source:MGI Symbol%3BAcc:MGI:894312]	GO:0032755:positive regulation of interleukin-6 production;GO:0032811:negative regulation of epinephrine secretion;GO:0007015:actin filament organization;GO:0016525:negative regulation of angiogenesis;GO:0014064:positive regulation of serotonin secretion;GO:0033685:negative regulation of luteinizing hormone secretion;GO:0030818:negative regulation of cAMP biosynthetic process;GO:0019233:sensory p…	GO:0009986:cell surface;GO:0005791:rough endoplasmic reticulum;GO:0043679:axon terminus;GO:0005886:plasma membrane;GO:0043204:perikaryon;GO:0016021:integral component of membrane;GO:0005794:Golgi apparatus;GO:0070852:cell body fiber;GO:0030425:dendrite;GO:0043196:varicosity;	GO:0017046:peptide hormone binding;GO:0015056:corticotrophin-releasing factor receptor activity;GO:0043404:corticotropin-releasing hormone receptor activity;GO:0005179:hormone activity;	K04579	;ko04080 Neuroactive ligand-receptor interaction;ko04934 Cushing syndrome;
ENSMUSG00000003477	1600	0	0	0	0	0	0	0	0	0	0	0	0	6	55147611	55152028	-	Inmt	indolethylamine N-methyltransferase [Source:MGI Symbol%3BAcc:MGI:102963]	GO:0032259:methylation;GO:0009308:amine metabolic process;GO:0009636:response to toxic substance;	GO:0005829:cytosol;	GO:0030748:amine N-methyltransferase activity;GO:0004790:thioether S-methyltransferase activity;	K00562	;ko00380 Tryptophan metabolism;ko00450 Selenocompound metabolism;ko01100 Metabolic pathways;
ENSMUSG00000003484	1855	0	0	0	0	0	0	0	0	0	0	1	0.04	8	72742326	72763470	-	Cyp4f18	cytochrome P450%2C family 4%2C subfamily f%2C polypeptide 18 [Source:MGI Symbol%3BAcc:MGI:1919304]	GO:0032305:positive regulation of icosanoid secretion;GO:0000038:very long-chain fatty acid metabolic process;GO:0019373:epoxygenase P450 pathway;GO:0055078:sodium ion homeostasis;GO:0036101:leukotriene B4 catabolic process;GO:0030195:negative regulation of blood coagulation;GO:0042360:vitamin E metabolic process;GO:0042371:vitamin K biosynthetic process;GO:0017144:drug metabolic process;GO:00030…	GO:0016021:integral component of membrane;GO:0005789:endoplasmic reticulum membrane;GO:0016324:apical plasma membrane;GO:0005783:endoplasmic reticulum;	GO:0047057:vitamin-K-epoxide reductase (warfarin-sensitive) activity;GO:0020037:heme binding;GO:0009055:electron carrier activity;GO:0052869:arachidonic acid omega-hydroxylase activity;GO:0050051:leukotriene-B4 20-monooxygenase activity;GO:0008392:arachidonic acid epoxygenase activity;GO:0005506:iron ion binding;GO:0052871:alpha-tocopherol omega-hydroxylase activity;GO:0052872:tocotrienol omega-h…	K17726	;ko00590 Arachidonic acid metabolism;ko01100 Metabolic pathways;
ENSMUSG00000003500	3294	1128	24.12	951	23.96	1536	26.21	953	21.04	1174	21.14	1136	22.78	6	29200433	29216363	-	Impdh1	inosine monophosphate dehydrogenase 1 [Source:MGI Symbol%3BAcc:MGI:96567]	GO:0055114:oxidation-reduction process;GO:0009409:response to cold;GO:0046651:lymphocyte proliferation;GO:0060041:retina development in camera-type eye;GO:0006177:GMP biosynthetic process;	GO:0005737:cytoplasm;GO:0005634:nucleus;	GO:0046872:metal ion binding;GO:0003677:DNA binding;GO:0000166:nucleotide binding;GO:0003938:IMP dehydrogenase activity;	K00088	;ko00230 Purine metabolism;ko00983 Drug metabolism - other enzymes;ko01100 Metabolic pathways;ko01110 Biosynthesis of secondary metabolites;
ENSMUSG00000003505	3232	0	0	0	0	0	0	0	0	0	0	0	0	7	18079347	18088934	-	Psg18	pregnancy specific glycoprotein 18 [Source:MGI Symbol%3BAcc:MGI:1347251]	GO:2001179:regulation of interleukin-10 secretion;GO:0007565:female pregnancy;GO:0010628:positive regulation of gene expression;GO:0009691:cytokinin biosynthetic process;	-	-	K06499	-
ENSMUSG00000003518	4682	2459	36.99	2006	35.56	3158	37.91	2910	45.19	3818	48.36	3320	46.84	11	101861969	101877839	-	Dusp3	dual specificity phosphatase 3 (vaccinia virus phosphatase VH1-related) [Source:MGI Symbol%3BAcc:MGI:1919599]	GO:0050868:negative regulation of T cell activation;GO:0045931:positive regulation of mitotic cell cycle;GO:0070373:negative regulation of ERK1 and ERK2 cascade;GO:0046329:negative regulation of JNK cascade;GO:0050860:negative regulation of T cell receptor signaling pathway;GO:0035335:peptidyl-tyrosine dephosphorylation;GO:0000188:inactivation of MAPK activity;GO:0001701:in utero embryonic develo…	GO:0005654:nucleoplasm;GO:0001772:immunological synapse;GO:0005829:cytosol;	GO:0008138:protein tyrosine/serine/threonine phosphatase activity;GO:0033549:MAP kinase phosphatase activity;GO:0004725:protein tyrosine phosphatase activity;	K17614	;ko04010 MAPK signaling pathway;
ENSMUSG00000003526	7797	10	0.09	9	0.1	17	0.12	10	0.09	26	0.2	20	0.17	16	17878221	17908067	-	Prodh	proline dehydrogenase [Source:MGI Symbol%3BAcc:MGI:97770]	GO:0055114:oxidation-reduction process;GO:0006537:glutamate biosynthetic process;GO:0006562:proline catabolic process;GO:0006560:proline metabolic process;	GO:0005743:mitochondrial inner membrane;	GO:0004657:proline dehydrogenase activity;GO:0016597:amino acid binding;GO:0071949:FAD binding;	K00318	;ko00330 Arginine and proline metabolism;ko01100 Metabolic pathways;ko01110 Biosynthesis of secondary metabolites;
ENSMUSG00000003527	4231	362	6.03	305	5.98	486	6.46	365	6.27	445	6.24	402	6.28	16	17718573	17729212	-	Ess2	ess-2 splicing factor [Source:MGI Symbol%3BAcc:MGI:107854]	GO:0006396:RNA processing;GO:0008380:RNA splicing;GO:0006397:mRNA processing;	GO:0071013:catalytic step 2 spliceosome;	-	K13118	-
ENSMUSG00000003528	2164	1457	47.42	1176	45.1	1978	51.38	1376	46.24	1733	47.49	1635	49.91	16	17743087	17746083	-	Slc25a1	solute carrier family 25 (mitochondrial carrier%2C citrate transporter)%2C member 1 [Source:MGI Symbol%3BAcc:MGI:1345283]	GO:0006843:mitochondrial citrate transport;	GO:0005743:mitochondrial inner membrane;GO:0016021:integral component of membrane;	GO:0015137:citrate transmembrane transporter activity;	K15100	-
ENSMUSG00000003531	2985	211	4.98	182	5.06	307	5.78	222	5.41	262	5.21	270	5.97	16	17870724	17889496	+	Dgcr6	DiGeorge syndrome critical region gene 6 [Source:MGI Symbol%3BAcc:MGI:1202877]	-	-	-	-	-
ENSMUSG00000003534	4774	12	0.18	3	0.05	14	0.16	11	0.17	10	0.12	8	0.11	17	35992459	36015513	-	Ddr1	discoidin domain receptor family%2C member 1 [Source:MGI Symbol%3BAcc:MGI:99216]	GO:0007595:lactation;GO:0038063:collagen-activated tyrosine kinase receptor signaling pathway;GO:0014909:smooth muscle cell migration;GO:0038083:peptidyl-tyrosine autophosphorylation;GO:0001952:regulation of cell-matrix adhesion;GO:0043583:ear development;GO:0001558:regulation of cell growth;GO:0061302:smooth muscle cell-matrix adhesion;GO:0060749:mammary gland alveolus development;GO:0008285:neg…	GO:0016323:basolateral plasma membrane;GO:0016021:integral component of membrane;	GO:0038062:protein tyrosine kinase collagen receptor activity;GO:0046872:metal ion binding;GO:0005518:collagen binding;GO:0005524:ATP binding;GO:0000166:nucleotide binding;GO:0043167:ion binding;	K05124	-
ENSMUSG00000003541	1131	2086	129.91	1653	121.29	2916	144.92	2099	134.95	2219	116.35	2233	130.42	17	36132576	36133815	+	Ier3	immediate early response 3 [Source:MGI Symbol%3BAcc:MGI:104814]	GO:0050728:negative regulation of inflammatory response;GO:0046822:regulation of nucleocytoplasmic transport;GO:0045820:negative regulation of glycolytic process;GO:0003085:negative regulation of systemic arterial blood pressure;GO:0000075:cell cycle checkpoint;GO:0043066:negative regulation of apoptotic process;GO:0001562:response to protozoan;GO:2000377:regulation of reactive oxygen species met…	GO:0016021:integral component of membrane;GO:0005634:nucleus;	GO:0005515:protein binding;	-	-
ENSMUSG00000003545	6243	35	0.39	32	0.43	47	0.42	22	0.26	30	0.28	24	0.25	7	19036621	19043976	-	Fosb	FBJ osteosarcoma oncogene B [Source:MGI Symbol%3BAcc:MGI:95575]	GO:0000122:negative regulation of transcription from RNA polymerase II promoter;GO:0007275:multicellular organismal development;GO:0007610:behavior;GO:0051412:response to corticosterone;GO:0006355:regulation of transcription, DNA-templated;GO:0007565:female pregnancy;GO:0032870:cellular response to hormone stimulus;GO:0071277:cellular response to calcium ion;GO:0042493:response to drug;GO:0032570…	GO:0005634:nucleus;	GO:0003677:DNA binding;GO:0008134:transcription factor binding;GO:0003690:double-stranded DNA binding;GO:0043565:sequence-specific DNA binding;GO:0003700:sequence-specific DNA binding transcription factor activity;GO:0046982:protein heterodimerization activity;	K09029	;ko04380 Osteoclast differentiation;ko04657 IL-17 signaling pathway;ko05030 Cocaine addiction;ko05031 Amphetamine addiction;ko05034 Alcoholism;
ENSMUSG00000003546	2377	359	10.64	314	10.96	438	10.36	498	15.23	561	14	564	15.67	17	46941550	46956948	-	Klc4	kinesin light chain 4 [Source:MGI Symbol%3BAcc:MGI:1922014]	-	GO:0005737:cytoplasm;GO:0005874:microtubule;GO:0005871:kinesin complex;	GO:0003777:microtubule motor activity;	K10407	;ko05010 Alzheimer disease;ko05012 Parkinson disease;ko05014 Amyotrophic lateral sclerosis;ko05016 Huntington disease;ko05020 Prion disease;ko05022 Pathways of neurodegeneration - multiple diseases;ko05132 Salmonella infection;
ENSMUSG00000003549	3111	209	4.73	197	5.26	274	4.95	199	4.65	212	4.04	214	4.54	7	19078703	19090449	+	Ercc1	excision repair cross-complementing rodent repair deficiency%2C complementation group 1 [Source:MGI Symbol%3BAcc:MGI:95412]	GO:0000720:pyrimidine dimer repair by nucleotide-excision repair;GO:0009650:UV protection;GO:0006312:mitotic recombination;GO:0010165:response to X-ray;GO:0009744:response to sucrose;GO:0032205:negative regulation of telomere maintenance;GO:0048568:embryonic organ development;GO:0043066:negative regulation of apoptotic process;GO:0035166:post-embryonic hemopoiesis;GO:0006949:syncytium formation;G…	GO:0000784:nuclear chromosome, telomeric region;GO:0005737:cytoplasm;GO:0005730:nucleolus;GO:0000109:nucleotide-excision repair complex;GO:0005669:transcription factor TFIID complex;	GO:0003684:damaged DNA binding;GO:0008022:protein C-terminus binding;GO:0003697:single-stranded DNA binding;GO:0019904:protein domain specific binding;GO:0017025:TBP-class protein binding;GO:0001094:TFIID-class transcription factor binding;GO:0000014:single-stranded DNA endodeoxyribonuclease activity;GO:0004519:endonuclease activity;	K10849	;ko01524 Platinum drug resistance;ko03420 Nucleotide excision repair;ko03460 Fanconi anemia pathway;
ENSMUSG00000003555	2769	0	0	0	0	0	0	0	0	0	0	1	0.02	19	46655604	46661611	-	Cyp17a1	cytochrome P450%2C family 17%2C subfamily a%2C polypeptide 1 [Source:MGI Symbol%3BAcc:MGI:88586]	GO:0018894:dibenzo-p-dioxin metabolic process;GO:0010034:response to acetate;GO:0060992:response to fungicide;GO:0051597:response to methylmercury;GO:0030325:adrenal gland development;GO:0006704:glucocorticoid biosynthetic process;GO:0032526:response to retinoic acid;GO:0021766:hippocampus development;GO:0006702:androgen biosynthetic process;GO:0017085:response to insecticide;GO:0048545:response …	GO:0016020:membrane;GO:0043025:neuronal cell body;GO:0030424:axon;GO:0005783:endoplasmic reticulum;GO:0005739:mitochondrion;	GO:0004508:steroid 17-alpha-monooxygenase activity;GO:0020037:heme binding;GO:0009055:electron carrier activity;GO:0005506:iron ion binding;GO:0016829:lyase activity;	K00512	;ko00140 Steroid hormone biosynthesis;ko01100 Metabolic pathways;ko04913 Ovarian steroidogenesis;ko04917 Prolactin signaling pathway;ko04927 Cortisol synthesis and secretion;ko04934 Cushing syndrome;
ENSMUSG00000003559	3212	408	8.95	344	8.89	511	8.94	385	8.72	527	9.73	458	9.42	19	46695897	46729538	+	As3mt	arsenite methyltransferase [Source:MGI Symbol%3BAcc:MGI:1929882]	GO:0018872:arsonoacetate metabolic process;GO:0046685:response to arsenic-containing substance;GO:0032259:methylation;GO:0009404:toxin metabolic process;	GO:0005829:cytosol;GO:0005739:mitochondrion;	GO:0030792:methylarsonite methyltransferase activity;GO:0030791:arsenite methyltransferase activity;	K07755	-
ENSMUSG00000003573	3440	220	4.5	187	4.51	280	4.58	230	4.86	274	4.72	284	5.45	8	70735477	70747011	+	Homer3	homer scaffolding protein 3 [Source:MGI Symbol%3BAcc:MGI:1347359]	GO:0007216:G-protein coupled glutamate receptor signaling pathway;	GO:0045211:postsynaptic membrane;GO:0030054:cell junction;GO:0005886:plasma membrane;GO:0045178:basal part of cell;GO:0014069:postsynaptic density;GO:0005829:cytosol;	GO:0019904:protein domain specific binding;GO:0008022:protein C-terminus binding;	K15010	;ko04068 FoxO signaling pathway;ko04724 Glutamatergic synapse;
ENSMUSG00000003575	11182	342	2.15	280	2.08	394	1.98	313	2.04	410	2.17	362	2.14	8	70835005	70892229	-	Crtc1	CREB regulated transcription coactivator 1 [Source:MGI Symbol%3BAcc:MGI:2142523]	GO:0045944:positive regulation of transcription from RNA polymerase II promoter;GO:0032793:positive regulation of CREB transcription factor activity;GO:0051289:protein homotetramerization;	GO:0005730:nucleolus;GO:0005737:cytoplasm;GO:0005886:plasma membrane;	GO:0008140:cAMP response element binding protein binding;	K15309	;ko05166 Human T-cell leukemia virus 1 infection;
ENSMUSG00000003581	2232	70	2.21	60	2.23	112	2.82	90	2.93	118	3.14	83	2.46	11	4085202	4091172	+	Rnf215	ring finger protein 215 [Source:MGI Symbol%3BAcc:MGI:1918923]	-	GO:0016021:integral component of membrane;GO:0016020:membrane;	GO:0008270:zinc ion binding;GO:0046872:metal ion binding;	-	-
ENSMUSG00000003585	3505	14	0.28	5	0.12	9	0.14	10	0.21	14	0.24	16	0.3	11	4047039	4073415	-	Sec14l2	SEC14-like lipid binding 2 [Source:MGI Symbol%3BAcc:MGI:1915065]	GO:0006810:transport;GO:0045540:regulation of cholesterol biosynthetic process;GO:0045893:positive regulation of transcription, DNA-templated;	GO:0016021:integral component of membrane;GO:0005737:cytoplasm;GO:0005634:nucleus;	GO:0008431:vitamin E binding;GO:0005543:phospholipid binding;GO:0005215:transporter activity;	K17981	-
ENSMUSG00000003604	5001	333	4.69	256	4.25	449	5.05	304	4.42	368	4.36	345	4.56	2	112323309	112464918	+	Aven	apoptosis%2C caspase activation inhibitor [Source:MGI Symbol%3BAcc:MGI:1921518]	GO:0043066:negative regulation of apoptotic process;	GO:0016020:membrane;GO:0005622:intracellular;	-	K04963	;ko04020 Calcium signaling pathway;ko04371 Apelin signaling pathway;ko04713 Circadian entrainment;ko04921 Oxytocin signaling pathway;ko04970 Salivary secretion;ko05010 Alzheimer disease;ko05012 Parkinson disease;ko05020 Prion disease;ko05022 Pathways of neurodegeneration - multiple diseases;
ENSMUSG00000003617	9566	1737	12.79	1393	12.08	1991	11.7	837	6.36	1059	6.57	1092	7.54	3	20011218	20063309	+	Cp	ceruloplasmin [Source:MGI Symbol%3BAcc:MGI:88476]	GO:0030324:lung development;GO:0055114:oxidation-reduction process;GO:0001889:liver development;GO:0007584:response to nutrient;GO:0006879:cellular iron ion homeostasis;GO:0015679:plasma membrane copper ion transport;GO:0046688:response to copper ion;GO:0007568:aging;GO:0006825:copper ion transport;GO:0006811:ion transport;	GO:0005615:extracellular space;GO:0046658:anchored component of plasma membrane;	GO:0005507:copper ion binding;GO:0051087:chaperone binding;GO:0004322:ferroxidase activity;	K13624	;ko00860 Porphyrin and chlorophyll metabolism;ko04216 Ferroptosis;
ENSMUSG00000003623	5456	360	4.65	253	3.85	416	4.29	314	4.18	406	4.41	389	4.71	5	9016033	9047324	-	Crot	carnitine O-octanoyltransferase [Source:MGI Symbol%3BAcc:MGI:1921364]	-	-	-	K05940	;ko04146 Peroxisome;
ENSMUSG00000003644	4258	2151	35.58	1802	35.12	2592	34.22	1627	27.79	2033	28.31	1745	27.07	4	133574601	133615108	-	Rps6ka1	ribosomal protein S6 kinase polypeptide 1 [Source:MGI Symbol%3BAcc:MGI:104558]	GO:0048011:neurotrophin TRK receptor signaling pathway;GO:0043555:regulation of translation in response to stress;GO:0034138:toll-like receptor 3 signaling pathway;GO:2000491:positive regulation of hepatic stellate cell activation;GO:0007411:axon guidance;GO:0034142:toll-like receptor 4 signaling pathway;GO:0008063:Toll signaling pathway;GO:0007268:synaptic transmission;GO:0034130:toll-like recep…	GO:0005829:cytosol;GO:0005654:nucleoplasm;GO:0005819:spindle;GO:0005840:ribosome;GO:0005634:nucleus;	GO:0004674:protein serine/threonine kinase activity;GO:0008134:transcription factor binding;GO:0000287:magnesium ion binding;GO:0043027:cysteine-type endopeptidase inhibitor activity involved in apoptotic process;GO:0005524:ATP binding;	K04373	;ko04010 MAPK signaling pathway;ko04114 Oocyte meiosis;ko04150 mTOR signaling pathway;ko04714 Thermogenesis;ko04720 Long-term potentiation;ko04722 Neurotrophin signaling pathway;ko04914 Progesterone-mediated oocyte maturation;ko04931 Insulin resistance;ko05135 Yersinia infection;
ENSMUSG00000003657	1743	0	0	0	0	0	0	0	0	1	0.03	1	0.04	8	110864134	110894842	-	Calb2	calbindin 2 [Source:MGI Symbol%3BAcc:MGI:101914]	GO:0051480:cytosolic calcium ion homeostasis;	GO:0005737:cytoplasm;GO:0005921:gap junction;GO:0005634:nucleus;	GO:0005509:calcium ion binding;	-	-
ENSMUSG00000003660	7819	4613	41.55	3719	39.47	5478	39.38	4652	43.26	5799	43.98	5019	42.4	2	127050306	127082371	+	Snrnp200	small nuclear ribonucleoprotein 200 (U5) [Source:MGI Symbol%3BAcc:MGI:2444401]	GO:0000398:mRNA splicing, via spliceosome;	GO:0005682:U5 snRNP;GO:0071013:catalytic step 2 spliceosome;	GO:0004004:ATP-dependent RNA helicase activity;GO:0003676:nucleic acid binding;GO:0005524:ATP binding;	K12854	;ko03040 Spliceosome;
ENSMUSG00000003662	3197	571	12.58	529	13.73	811	14.26	593	13.49	693	12.86	641	13.24	2	127082858	127089736	-	Ciao1	cytosolic iron-sulfur protein assembly 1 [Source:MGI Symbol%3BAcc:MGI:1346998]	GO:0006357:regulation of transcription from RNA polymerase II promoter;GO:0016226:iron-sulfur cluster assembly;GO:0007059:chromosome segregation;	GO:0097361:CIA complex;GO:0071817:MMXD complex;	GO:0003700:sequence-specific DNA binding transcription factor activity;	-	-
ENSMUSG00000003665	4518	2	0.03	1	0.02	1	0.01	0	0	1	0.01	0	0	17	18063585	18075467	-	Has1	hyaluronan synthase 1 [Source:MGI Symbol%3BAcc:MGI:106590]	GO:0036120:cellular response to platelet-derived growth factor stimulus;GO:0030213:hyaluronan biosynthetic process;GO:0010764:negative regulation of fibroblast migration;	GO:0016021:integral component of membrane;	GO:0050501:hyaluronan synthase activity;	K00752	-
ENSMUSG00000003680	5017	398	5.59	363	6	531	5.95	429	6.22	484	5.72	464	6.11	19	8751851	8763781	-	Taf6l	TATA-box binding protein associated factor 6 like [Source:MGI Symbol%3BAcc:MGI:2444957]	GO:0043966:histone H3 acetylation;GO:0006352:DNA-templated transcription, initiation;GO:0051090:regulation of sequence-specific DNA binding transcription factor activity;	GO:0030914:STAGA complex;	GO:0046982:protein heterodimerization activity;GO:0004402:histone acetyltransferase activity;GO:0003713:transcription coactivator activity;	K03131	;ko03022 Basal transcription factors;
ENSMUSG00000003721	3473	279	5.66	233	5.57	371	6	280	5.86	369	6.3	337	6.41	1	121232082	121260318	-	Insig2	insulin induced gene 2 [Source:MGI Symbol%3BAcc:MGI:1920249]	GO:0032933:SREBP signaling pathway;GO:0060021:palate development;GO:0032868:response to insulin;GO:0070542:response to fatty acid;GO:0060363:cranial suture morphogenesis;GO:0042472:inner ear morphogenesis;GO:0006695:cholesterol biosynthetic process;GO:0042474:middle ear morphogenesis;GO:0010894:negative regulation of steroid biosynthetic process;GO:0006641:triglyceride metabolic process;GO:004571…	GO:0032937:SREBP-SCAP-Insig complex;	GO:0008134:transcription factor binding;	-	-
ENSMUSG00000003731	6729	2043	21.38	1579	19.47	2287	19.1	2017	21.8	2561	22.57	2229	21.88	4	129537773	129566560	-	Kpna6	karyopherin (importin) alpha 6 [Source:MGI Symbol%3BAcc:MGI:1100836]	GO:0006606:protein import into nucleus;GO:0045944:positive regulation of transcription from RNA polymerase II promoter;GO:0060135:maternal process involved in female pregnancy;	GO:0005737:cytoplasm;GO:0005634:nucleus;	GO:0008565:protein transporter activity;GO:0005515:protein binding;	K15042	;ko05164 Influenza A;
ENSMUSG00000003746	9647	94	0.69	85	0.73	140	0.82	119	0.9	129	0.79	129	0.88	10	53780881	53952705	-	Man1a	mannosidase 1%2C alpha [Source:MGI Symbol%3BAcc:MGI:104677]	GO:0008152:metabolic process;	GO:0000139:Golgi membrane;GO:0005793:endoplasmic reticulum-Golgi intermediate compartment;GO:0016021:integral component of membrane;	GO:0004571:mannosyl-oligosaccharide 1,2-alpha-mannosidase activity;GO:0005509:calcium ion binding;	K01230	;ko00510 N-Glycan biosynthesis;ko00513 Various types of N-glycan biosynthesis;ko01100 Metabolic pathways;ko04141 Protein processing in endoplasmic reticulum;
ENSMUSG00000003752	5285	84	1.12	67	1.05	122	1.3	62	0.85	99	1.11	101	1.26	7	26906597	26928086	-	Itpkc	inositol 1%2C4%2C5-trisphosphate 3-kinase C [Source:MGI Symbol%3BAcc:MGI:2442554]	GO:0016310:phosphorylation;	GO:0005737:cytoplasm;GO:0005634:nucleus;	GO:0008440:inositol-1,4,5-trisphosphate 3-kinase activity;GO:0005524:ATP binding;GO:0005516:calmodulin binding;	K00911	;ko00562 Inositol phosphate metabolism;ko01100 Metabolic pathways;ko04020 Calcium signaling pathway;ko04070 Phosphatidylinositol signaling system;
ENSMUSG00000003762	5586	209	2.64	190	2.82	255	2.57	197	2.56	308	3.27	217	2.57	7	26932448	26957375	+	Coq8b	coenzyme Q8B [Source:MGI Symbol%3BAcc:MGI:1924139]	GO:0016310:phosphorylation;	GO:0016021:integral component of membrane;GO:0005739:mitochondrion;	GO:0004674:protein serine/threonine kinase activity;	K08869	-
ENSMUSG00000003778	10633	1502	9.95	1207	9.42	1767	9.34	1422	9.72	1747	9.74	1447	8.99	18	34731668	34757654	-	Brd8	bromodomain containing 8 [Source:MGI Symbol%3BAcc:MGI:1925906]	GO:0040008:regulation of growth;GO:0043967:histone H4 acetylation;GO:0043968:histone H2A acetylation;GO:0006355:regulation of transcription, DNA-templated;	GO:0035267:NuA4 histone acetyltransferase complex;	-	K11321	-
ENSMUSG00000003779	4338	2536	41.18	2277	43.56	3296	42.71	2310	38.72	2865	39.17	2595	39.51	18	34757666	34766330	+	Kif20a	kinesin family member 20A [Source:MGI Symbol%3BAcc:MGI:1201682]	GO:0001578:microtubule bundle formation;GO:0000910:cytokinesis;GO:0007018:microtubule-based movement;GO:0015031:protein transport;	GO:0005875:microtubule associated complex;GO:0005874:microtubule;GO:0005819:spindle;GO:0005794:Golgi apparatus;	GO:0003777:microtubule motor activity;GO:0005524:ATP binding;GO:0019901:protein kinase binding;	K10402	-
ENSMUSG00000003808	4538	1415	21.96	1171	21.41	1776	22	1300	20.83	1524	19.92	1314	19.13	8	85583618	85595886	+	Farsa	phenylalanyl-tRNA synthetase%2C alpha subunit [Source:MGI Symbol%3BAcc:MGI:1913840]	GO:0006432:phenylalanyl-tRNA aminoacylation;	GO:0005737:cytoplasm;	GO:0005524:ATP binding;GO:0004826:phenylalanine-tRNA ligase activity;GO:0000049:tRNA binding;	K01889	;ko00970 Aminoacyl-tRNA biosynthesis;
ENSMUSG00000003809	2754	172	4.4	143	4.31	277	5.65	190	5.02	193	4.16	243	5.83	8	85613022	85620550	-	Gcdh	glutaryl-Coenzyme A dehydrogenase [Source:MGI Symbol%3BAcc:MGI:104541]	GO:0019395:fatty acid oxidation;GO:0046949:fatty-acyl-CoA biosynthetic process;	GO:0005743:mitochondrial inner membrane;	GO:0000062:fatty-acyl-CoA binding;GO:0004361:glutaryl-CoA dehydrogenase activity;GO:0050660:flavin adenine dinucleotide binding;	K00252	;ko00071 Fatty acid degradation;ko00310 Lysine degradation;ko00362 Benzoate degradation;ko00380 Tryptophan metabolism;ko01100 Metabolic pathways;ko01110 Biosynthesis of secondary metabolites;ko01120 Microbial metabolism in diverse environments;
ENSMUSG00000003810	8049	1253	10.96	1041	10.73	1341	9.36	1142	10.32	1482	10.92	1228	10.08	4	116163959	116321380	-	Mast2	microtubule associated serine/threonine kinase 2 [Source:MGI Symbol%3BAcc:MGI:894676]	GO:0006468:protein phosphorylation;GO:0048515:spermatid differentiation;GO:0045075:regulation of interleukin-12 biosynthetic process;	GO:0030054:cell junction;GO:0015630:microtubule cytoskeleton;GO:0005737:cytoplasm;GO:0016020:membrane;	GO:0008017:microtubule binding;GO:0004674:protein serine/threonine kinase activity;GO:0019902:phosphatase binding;GO:0005524:ATP binding;GO:0000287:magnesium ion binding;	K08789	-
ENSMUSG00000003812	5389	2243	29.32	1883	29	2788	29.08	2875	38.79	3365	37.03	3026	37.09	8	85635189	85649544	+	Dnase2a	deoxyribonuclease II alpha [Source:MGI Symbol%3BAcc:MGI:1329019]	GO:0006915:apoptotic process;GO:0006308:DNA catabolic process;GO:0030218:erythrocyte differentiation;	GO:0005764:lysosome;	GO:0004531:deoxyribonuclease II activity;	K01158	;ko04142 Lysosome;
ENSMUSG00000003813	2577	809	22.11	702	22.61	987	21.53	766	21.61	996	22.92	856	21.94	8	85560648	85567294	-	Rad23a	RAD23 homolog A%2C nucleotide excision repair protein [Source:MGI Symbol%3BAcc:MGI:105126]	GO:0006289:nucleotide-excision repair;GO:0045070:positive regulation of viral genome replication;GO:0032434:regulation of proteasomal ubiquitin-dependent protein catabolic process;	GO:0000502:proteasome complex;GO:0005634:nucleus;	GO:0031593:polyubiquitin binding;GO:0003684:damaged DNA binding;	K10839	;ko03420 Nucleotide excision repair;ko04141 Protein processing in endoplasmic reticulum;
ENSMUSG00000003814	2880	35737	874	32035	923.08	45030	878.87	32764	827.24	39306	809.38	36432	835.6	8	85568479	85573563	-	Calr	calreticulin [Source:MGI Symbol%3BAcc:MGI:88252]	GO:0055007:cardiac muscle cell differentiation;GO:0045665:negative regulation of neuron differentiation;GO:0008284:positive regulation of cell proliferation;GO:0030866:cortical actin cytoskeleton organization;GO:0061077:chaperone-mediated protein folding;GO:0007283:spermatogenesis;GO:0017148:negative regulation of translation;GO:0033574:response to testosterone;GO:0045740:positive regulation of D…	GO:0005829:cytosol;GO:0005615:extracellular space;GO:0005844:polysome;GO:0001669:acrosomal vesicle;GO:0048471:perinuclear region of cytoplasm;GO:0042824:MHC class I peptide loading complex;GO:0005794:Golgi apparatus;GO:0009897:external side of plasma membrane;GO:0033018:sarcoplasmic reticulum lumen;GO:0005634:nucleus;GO:0031012:extracellular matrix;	GO:0005506:iron ion binding;GO:0051082:unfolded protein binding;GO:0031625:ubiquitin protein ligase binding;GO:0042562:hormone binding;GO:0030246:carbohydrate binding;GO:0005178:integrin binding;GO:0003729:mRNA binding;GO:0050681:androgen receptor binding;GO:0042277:peptide binding;GO:0001948:glycoprotein binding;GO:0005509:calcium ion binding;	K08057	;ko04141 Protein processing in endoplasmic reticulum;ko04145 Phagosome;ko04612 Antigen processing and presentation;ko05142 Chagas disease;ko05163 Human cytomegalovirus infection;ko05166 Human T-cell leukemia virus 1 infection;ko05168 Herpes simplex virus 1 infection;ko05169 Epstein-Barr virus infection;ko05170 Human immunodeficiency virus 1 infection;
ENSMUSG00000003824	1968	1769	63.31	1651	69.62	2617	74.75	1838	67.91	2130	64.19	1936	64.98	8	85598740	85614850	+	Syce2	synaptonemal complex central element protein 2 [Source:MGI Symbol%3BAcc:MGI:1919096]	GO:0007130:synaptonemal complex assembly;GO:0007128:meiotic prophase I;GO:0051301:cell division;	GO:0000801:central element;	GO:0005515:protein binding;	K19535	-
ENSMUSG00000003847	18378	13768	52.77	10279	46.42	12171	37.23	12176	48.18	17592	56.77	11921	42.85	8	108020102	108106149	+	Nfat5	nuclear factor of activated T cells 5 [Source:MGI Symbol%3BAcc:MGI:1859333]	GO:0045944:positive regulation of transcription from RNA polymerase II promoter;GO:0070884:regulation of calcineurin-NFAT signaling cascade;GO:0001816:cytokine production;	GO:0005737:cytoplasm;GO:0005634:nucleus;	GO:0003677:DNA binding;GO:0003700:sequence-specific DNA binding transcription factor activity;	K17335	-
ENSMUSG00000003848	3486	1217	24.59	1037	24.69	1538	24.8	1148	23.95	1376	23.41	1244	23.57	8	108139118	108151683	-	Nob1	NIN1/RPN12 binding protein 1 homolog [Source:MGI Symbol%3BAcc:MGI:1914869]	GO:0030490:maturation of SSU-rRNA;	GO:0005737:cytoplasm;GO:0005730:nucleolus;	GO:0046872:metal ion binding;	K11883	;ko03008 Ribosome biogenesis in eukaryotes;
ENSMUSG00000003849	1553	11	0.5	22	1.18	18	0.65	13	0.61	13	0.5	11	0.47	8	108114857	108129838	-	Nqo1	NAD(P)H dehydrogenase%2C quinone 1 [Source:MGI Symbol%3BAcc:MGI:103187]	GO:0043525:positive regulation of neuron apoptotic process;GO:0006979:response to oxidative stress;GO:0006801:superoxide metabolic process;GO:0043086:negative regulation of catalytic activity;GO:0055114:oxidation-reduction process;	GO:0005829:cytosol;GO:0043025:neuronal cell body;	GO:0003955:NAD(P)H dehydrogenase (quinone) activity;GO:0004784:superoxide dismutase activity;	K00355	;ko00130 Ubiquinone and other terpenoid-quinone biosynthesis;ko01100 Metabolic pathways;ko01110 Biosynthesis of secondary metabolites;ko01240 Biosynthesis of cofactors;ko05200 Pathways in cancer;ko05225 Hepatocellular carcinoma;ko05418 Fluid shear stress and atherosclerosis;
ENSMUSG00000003863	7899	37	0.33	33	0.35	28	0.2	39	0.36	37	0.28	44	0.37	7	44988546	45016443	-	Ppfia3	protein tyrosine phosphatase%2C receptor type%2C f polypeptide (PTPRF)%2C interacting protein (liprin)%2C alpha 3 [Source:MGI Symbol%3BAcc:MGI:1924037]	GO:0048172:regulation of short-term neuronal synaptic plasticity;GO:0007269:neurotransmitter secretion;	GO:0005737:cytoplasm;	-	-	-
ENSMUSG00000003865	4789	791	11.63	623	10.8	961	11.28	762	11.57	885	10.96	861	11.88	7	45084268	45106043	+	Gys1	glycogen synthase 1%2C muscle [Source:MGI Symbol%3BAcc:MGI:101805]	GO:0005978:glycogen biosynthetic process;GO:0007507:heart development;GO:0006006:glucose metabolic process;GO:0044281:small molecule metabolic process;	GO:0005737:cytoplasm;GO:0016234:inclusion body;GO:0005829:cytosol;	GO:0004373:glycogen (starch) synthase activity;GO:0019901:protein kinase binding;GO:0005536:glucose binding;	K00693	;ko00500 Starch and sucrose metabolism;ko01100 Metabolic pathways;ko01110 Biosynthesis of secondary metabolites;ko04151 PI3K-Akt signaling pathway;ko04152 AMPK signaling pathway;ko04910 Insulin signaling pathway;ko04922 Glucagon signaling pathway;ko04931 Insulin resistance;
ENSMUSG00000003868	2902	2438	59.17	2071	59.22	3232	62.6	2432	60.94	2792	57.06	2578	58.68	7	45071184	45087520	-	Ruvbl2	RuvB-like protein 2 [Source:MGI Symbol%3BAcc:MGI:1342299]	GO:0043967:histone H4 acetylation;GO:0032508:DNA duplex unwinding;GO:0006310:DNA recombination;GO:0006355:regulation of transcription, DNA-templated;GO:0034644:cellular response to UV;GO:0043968:histone H2A acetylation;GO:0006281:DNA repair;	GO:0031011:Ino80 complex;GO:0035267:NuA4 histone acetyltransferase complex;GO:0030529:ribonucleoprotein complex;GO:0071339:MLL1 complex;	GO:0003684:damaged DNA binding;GO:0043141:ATP-dependent 5'-3' DNA helicase activity;GO:0042802:identical protein binding;GO:0005524:ATP binding;GO:0003678:DNA helicase activity;	K11338	-
ENSMUSG00000003872	1463	4	0.19	4	0.23	8	0.31	8	0.4	4	0.16	8	0.36	7	45017315	45020007	-	Lin7b	lin-7 homolog B (C. elegans) [Source:MGI Symbol%3BAcc:MGI:1330858]	GO:0007043:cell-cell junction assembly;GO:0006887:exocytosis;GO:0007269:neurotransmitter secretion;GO:0015031:protein transport;	GO:0005923:bicellular tight junction;GO:0045211:postsynaptic membrane;GO:0016323:basolateral plasma membrane;GO:0014069:postsynaptic density;GO:0043005:neuron projection;GO:0005886:plasma membrane;	GO:0019904:protein domain specific binding;	-	-
ENSMUSG00000003873	1576	2999	134.03	2570	135.33	4184	149.23	2954	136.3	3525	132.64	3281	137.52	7	45111121	45116322	-	Bax	BCL2-associated X protein [Source:MGI Symbol%3BAcc:MGI:99702]	GO:0043525:positive regulation of neuron apoptotic process;GO:0008053:mitochondrial fusion;GO:0048087:positive regulation of developmental pigmentation;GO:1900103:positive regulation of endoplasmic reticulum unfolded protein response;GO:0006808:regulation of nitrogen utilization;GO:0030521:androgen receptor signaling pathway;GO:2001244:positive regulation of intrinsic apoptotic signaling pathway;…	GO:0005741:mitochondrial outer membrane;GO:0005789:endoplasmic reticulum membrane;GO:0097136:Bcl-2 family protein complex;GO:0044445:cytosolic part;GO:0005634:nucleus;GO:0005757:mitochondrial permeability transition pore complex;	GO:0008289:lipid binding;GO:0043621:protein self-association;GO:0004882:androgen receptor activity;GO:0030331:estrogen receptor binding;GO:0032403:protein complex binding;GO:0046982:protein heterodimerization activity;GO:0097162:MADS box domain binding;GO:0008134:transcription factor binding;GO:0042803:protein homodimerization activity;GO:0031072:heat shock protein binding;GO:0051087:chaperone bi…	K02159	;ko01521 EGFR tyrosine kinase inhibitor resistance;ko01522 Endocrine resistance;ko01524 Platinum drug resistance;ko04071 Sphingolipid signaling pathway;ko04115 p53 signaling pathway;ko04141 Protein processing in endoplasmic reticulum;ko04210 Apoptosis;ko04211 Longevity regulating pathway;ko04215 Apoptosis - multiple species;ko04217 Necroptosis;ko04722 Neurotrophin signaling pathway;ko04932 Non-al…
ENSMUSG00000003882	4663	10	0.15	8	0.14	10	0.12	63	0.98	93	1.18	90	1.27	15	9505874	9530262	-	Il7r	interleukin 7 receptor [Source:MGI Symbol%3BAcc:MGI:96562]	GO:0016049:cell growth;GO:0000902:cell morphogenesis;GO:0048535:lymph node development;GO:0008361:regulation of cell size;GO:0010628:positive regulation of gene expression;GO:0001915:negative regulation of T cell mediated cytotoxicity;GO:0033089:positive regulation of T cell differentiation in thymus;GO:0048872:homeostasis of number of cells;GO:0002377:immunoglobulin production;GO:0042100:B cell …	GO:0009897:external side of plasma membrane;GO:0016021:integral component of membrane;	GO:0004896:cytokine receptor activity;	K05072	;ko04060 Cytokine-cytokine receptor interaction;ko04068 FoxO signaling pathway;ko04151 PI3K-Akt signaling pathway;ko04630 JAK-STAT signaling pathway;ko04640 Hematopoietic cell lineage;ko05200 Pathways in cancer;ko05340 Primary immunodeficiency;
ENSMUSG00000003923	4438	1106	17.55	1004	18.77	1504	19.05	1109	18.17	1344	17.96	1193	17.76	10	71061294	71074110	-	Tfam	transcription factor A%2C mitochondrial [Source:MGI Symbol%3BAcc:MGI:107810]	GO:0006264:mitochondrial DNA replication;GO:0006391:transcription initiation from mitochondrial promoter;GO:0033108:mitochondrial respiratory chain complex assembly;GO:0045893:positive regulation of transcription, DNA-templated;	GO:0005667:transcription factor complex;GO:0042645:mitochondrial nucleoid;	GO:0031072:heat shock protein binding;GO:0008301:DNA binding, bending;GO:0070363:mitochondrial light strand promoter sense binding;GO:0003700:sequence-specific DNA binding transcription factor activity;GO:0003682:chromatin binding;	K11830	;ko04371 Apelin signaling pathway;ko05016 Huntington disease;
ENSMUSG00000003929	6790	261	2.71	220	2.69	290	2.4	245	2.62	316	2.76	275	2.68	17	33548316	33577852	-	Zfp81	zinc finger protein 81 [Source:MGI Symbol%3BAcc:MGI:1890752]	-	-	GO:0046872:metal ion binding;	K09228	;ko05168 Herpes simplex virus 1 infection;
ENSMUSG00000003934	3183	6	0.13	7	0.18	13	0.23	6	0.14	12	0.22	3	0.06	11	69444918	69451031	-	Efnb3	ephrin B3 [Source:MGI Symbol%3BAcc:MGI:109196]	GO:0016198:axon choice point recognition;GO:0048013:ephrin receptor signaling pathway;GO:0007628:adult walking behavior;	GO:0016020:membrane;	GO:0046875:ephrin receptor binding;	K05463	;ko04360 Axon guidance;
ENSMUSG00000003948	3581	380	7.47	343	7.95	491	7.71	382	7.76	408	6.76	349	6.44	11	90140282	90169415	+	Mmd	monocyte to macrophage differentiation-associated [Source:MGI Symbol%3BAcc:MGI:1914718]	GO:0019835:cytolysis;	GO:0005887:integral component of plasma membrane;GO:0031902:late endosome membrane;GO:0005765:lysosomal membrane;	GO:0004872:receptor activity;	K11064	-
ENSMUSG00000003949	6681	0	0	0	0	0	0	1	0.01	0	0	2	0.02	11	90227362	90281721	-	Hlf	hepatic leukemia factor [Source:MGI Symbol%3BAcc:MGI:96108]	GO:0001525:angiogenesis;GO:0048469:cell maturation;GO:0002027:regulation of heart rate;GO:0030324:lung development;GO:0043129:surfactant homeostasis;GO:0048511:rhythmic process;GO:0042415:norepinephrine metabolic process;GO:0001892:embryonic placenta development;GO:0043619:regulation of transcription from RNA polymerase II promoter in response to oxidative stress;GO:0035914:skeletal muscle cell d…	GO:0005737:cytoplasm;GO:0005667:transcription factor complex;	GO:0004871:signal transducer activity;GO:0001077:RNA polymerase II core promoter proximal region sequence-specific DNA binding transcription factor activity involved in positive regulation of transcription;GO:0046982:protein heterodimerization activity;GO:0035035:histone acetyltransferase binding;GO:0043565:sequence-specific DNA binding;GO:0008134:transcription factor binding;	K09057	;ko04711 Circadian rhythm - fly;
ENSMUSG00000003955	850	748	61.98	619	60.43	1085	71.75	709	60.65	889	62.03	792	61.55	16	35864131	35891964	-	Fam162a	family with sequence similarity 162%2C member A [Source:MGI Symbol%3BAcc:MGI:1917436]	GO:0051402:neuron apoptotic process;GO:0071456:cellular response to hypoxia;GO:0090200:positive regulation of release of cytochrome c from mitochondria;GO:0043065:positive regulation of apoptotic process;GO:0006919:activation of cysteine-type endopeptidase activity involved in apoptotic process;GO:0006927:transformed cell apoptotic process;	GO:0005739:mitochondrion;GO:0016021:integral component of membrane;	-	-	-
ENSMUSG00000003970	1359	17484	906.16	15252	931.36	25048	1036.02	17264	923.74	20339	887.55	19112	928.96	15	76788278	76790514	+	Rpl8	ribosomal protein L8 [Source:MGI Symbol%3BAcc:MGI:1350927]	GO:0006412:translation;	GO:0022625:cytosolic large ribosomal subunit;	GO:0003735:structural constituent of ribosome;GO:0019843:rRNA binding;	K02938	;ko03010 Ribosome;ko05171 Coronavirus disease - COVID-19;
ENSMUSG00000003974	3049	0	0	0	0	0	0	0	0	0	0	0	0	5	9535541	9775170	-	Grm3	glutamate receptor%2C metabotropic 3 [Source:MGI Symbol%3BAcc:MGI:1351340]	GO:0035249:synaptic transmission, glutamatergic;GO:0050804:regulation of synaptic transmission;GO:0007196:adenylate cyclase-inhibiting G-protein coupled glutamate receptor signaling pathway;GO:0051930:regulation of sensory perception of pain;	GO:0030424:axon;GO:0016021:integral component of membrane;GO:0097449:astrocyte projection;GO:0042734:presynaptic membrane;GO:0045211:postsynaptic membrane;GO:0048786:presynaptic active zone;GO:0014069:postsynaptic density;GO:0005886:plasma membrane;	GO:0005246:calcium channel regulator activity;GO:0001641:group II metabotropic glutamate receptor activity;	K04605	;ko04072 Phospholipase D signaling pathway;ko04080 Neuroactive ligand-receptor interaction;ko04724 Glutamatergic synapse;ko05030 Cocaine addiction;
ENSMUSG00000003992	7985	3	0.03	0	0	2	0.01	2	0.02	1	0.01	1	0.01	13	91608402	91851548	+	Ssbp2	single-stranded DNA binding protein 2 [Source:MGI Symbol%3BAcc:MGI:1914220]	GO:0006351:transcription, DNA-templated;GO:0006355:regulation of transcription, DNA-templated;	GO:0005737:cytoplasm;GO:0005634:nucleus;	GO:0003677:DNA binding;GO:0005515:protein binding;GO:0003697:single-stranded DNA binding;	-	-
ENSMUSG00000004018	3372	238	4.97	244	6	366	6.1	236	5.09	314	5.52	283	5.54	11	26336135	26421876	+	Fancl	Fanconi anemia%2C complementation group L [Source:MGI Symbol%3BAcc:MGI:1914280]	GO:0007276:gamete generation;GO:0006281:DNA repair;GO:0006513:protein monoubiquitination;GO:0042127:regulation of cell proliferation;	GO:0043240:Fanconi anaemia nuclear complex;GO:0005635:nuclear envelope;GO:0005737:cytoplasm;	GO:0008270:zinc ion binding;GO:0031625:ubiquitin protein ligase binding;GO:0004842:ubiquitin-protein transferase activity;	K10606	;ko03460 Fanconi anemia pathway;ko04120 Ubiquitin mediated proteolysis;
ENSMUSG00000004031	8767	0	0	0	0	0	0	1	0.01	0	0	0	0	1	158072839	158183896	-	Brinp2	bone morphogenic protein/retinoic acid inducible neural-specific 2 [Source:MGI Symbol%3BAcc:MGI:2443333]	GO:0007399:nervous system development;GO:0045786:negative regulation of cell cycle;	GO:0030425:dendrite;GO:0005576:extracellular region;GO:0043025:neuronal cell body;GO:0005783:endoplasmic reticulum;	-	-	-
ENSMUSG00000004032	1278	11	0.61	8	0.52	22	0.97	16	0.91	16	0.74	18	0.93	3	107803137	107806002	+	Gstm5	glutathione S-transferase%2C mu 5 [Source:MGI Symbol%3BAcc:MGI:1309466]	GO:0006749:glutathione metabolic process;	GO:0005737:cytoplasm;	GO:0004364:glutathione transferase activity;GO:0042803:protein homodimerization activity;	K00799	;ko00480 Glutathione metabolism;ko00980 Metabolism of xenobiotics by cytochrome P450;ko00982 Drug metabolism - cytochrome P450;ko00983 Drug metabolism - other enzymes;ko01100 Metabolic pathways;ko01524 Platinum drug resistance;ko04212 Longevity regulating pathway - worm;ko05200 Pathways in cancer;ko05204 Chemical carcinogenesis;ko05225 Hepatocellular carcinoma;ko05418 Fluid shear stress and ather…
ENSMUSG00000004035	1601	0	0	0	0	1	0.04	0	0	0	0	0	0	3	107833650	107839133	-	Gstm7	glutathione S-transferase%2C mu 7 [Source:MGI Symbol%3BAcc:MGI:1915562]	GO:0008152:metabolic process;	GO:0005737:cytoplasm;	GO:0004364:glutathione transferase activity;	K00799	;ko00480 Glutathione metabolism;ko00980 Metabolism of xenobiotics by cytochrome P450;ko00982 Drug metabolism - cytochrome P450;ko00983 Drug metabolism - other enzymes;ko01100 Metabolic pathways;ko01524 Platinum drug resistance;ko04212 Longevity regulating pathway - worm;ko05200 Pathways in cancer;ko05204 Chemical carcinogenesis;ko05225 Hepatocellular carcinoma;ko05418 Fluid shear stress and ather…
ENSMUSG00000004038	1311	0	0	0	0	0	0	0	0	0	0	0	0	3	107871012	107876599	-	Gstm3	glutathione S-transferase%2C mu 3 [Source:MGI Symbol%3BAcc:MGI:106026]	-	-	-	K00799	;ko00480 Glutathione metabolism;ko00980 Metabolism of xenobiotics by cytochrome P450;ko00982 Drug metabolism - cytochrome P450;ko00983 Drug metabolism - other enzymes;ko01100 Metabolic pathways;ko01524 Platinum drug resistance;ko04212 Longevity regulating pathway - worm;ko05200 Pathways in cancer;ko05204 Chemical carcinogenesis;ko05225 Hepatocellular carcinoma;ko05418 Fluid shear stress and ather…
ENSMUSG00000004040	9527	1260	9.32	1046	9.11	1596	9.42	1065	8.13	1331	8.29	1162	8.06	11	100775924	100830366	-	Stat3	signal transducer and activator of transcription 3 [Source:MGI Symbol%3BAcc:MGI:103038]	-	-	-	K04692	;ko01521 EGFR tyrosine kinase inhibitor resistance;ko04062 Chemokine signaling pathway;ko04066 HIF-1 signaling pathway;ko04068 FoxO signaling pathway;ko04217 Necroptosis;ko04550 Signaling pathways regulating pluripotency of stem cells;ko04630 JAK-STAT signaling pathway;ko04659 Th17 cell differentiation;ko04917 Prolactin signaling pathway;ko04920 Adipocytokine signaling pathway;ko04931 Insulin res…
ENSMUSG00000004043	7133	342	3.38	268	3.12	401	3.16	339	3.46	427	3.55	359	3.32	11	100750177	100775995	+	Stat5a	signal transducer and activator of transcription 5A [Source:MGI Symbol%3BAcc:MGI:103036]	GO:0000255:allantoin metabolic process;GO:0042104:positive regulation of activated T cell proliferation;GO:0006600:creatine metabolic process;GO:0006549:isoleucine metabolic process;GO:0060376:positive regulation of mast cell differentiation;GO:0060397:JAK-STAT cascade involved in growth hormone signaling pathway;GO:0046449:creatinine metabolic process;GO:0033026:negative regulation of mast cell …	GO:0005829:cytosol;GO:0005730:nucleolus;GO:0005737:cytoplasm;GO:0005634:nucleus;GO:0005654:nucleoplasm;	GO:0003700:sequence-specific DNA binding transcription factor activity;GO:0004871:signal transducer activity;GO:0000979:RNA polymerase II core promoter sequence-specific DNA binding;GO:0003690:double-stranded DNA binding;GO:0005515:protein binding;GO:0005509:calcium ion binding;	K11223	;ko04012 ErbB signaling pathway;ko04217 Necroptosis;ko04630 JAK-STAT signaling pathway;ko04658 Th1 and Th2 cell differentiation;ko04659 Th17 cell differentiation;ko04917 Prolactin signaling pathway;ko04933 AGE-RAGE signaling pathway in diabetic complications;ko04935 Growth hormone synthesis, secretion and action;ko05161 Hepatitis B;ko05162 Measles;ko05166 Human T-cell leukemia virus 1 infection;k…
[truncated: 54,698 more rows]
